# Supplementary material for: Circadian oscillations in Trichoderma atroviride and the role of core clock components in secondary metabolism, development, and mycoparasitism against the phytopathogen Botrytis cinerea
Source: eLife. 2022 Aug 11;11:e71358. doi: 10.7554/eLife.71358 (PMC9427114; doi:10.7554/eLife.71358)
Supplement: Figure 1—source data 1. — Data is organized in individual sheets following the same order as in Figure 1. [file elife-71358-fig1-data1.xlsx]

## Sheet: Figure 1. A (GYEC LD)
time	TaFRQLUC
0	247	343	395	306	257	162	225	214	318	88	173	225	208	176	268	269		Data available in GraphPad format (.pzfx) upon request.
0.333	248	358	369	292	254	262	284	224	313	131	165	222	205	185	339	325
0.667	228	323	351	290	254	212	245	196	307	83	157	213	195	175	274	286
1	214	296	340	285	252	184	220	179	297	72	145	202	187	166	250	260
1.333	197	266	329	277	238	163	196	163	281	65	137	187	179	159	230	235
1.667	181	241	317	268	225	142	176	154	268	62	127	173	171	153	213	212
2	167	219	300	247	213	124	160	144	254	57	117	159	163	145	195	192
2.333	157	201	288	230	201	109	150	135	243	53	109	148	156	138	181	173
2.667	149	188	276	218	189	98	140	128	233	50	101	136	147	132	167	161
3	140	177	263	205	181	90	132	123	223	49	94	128	140	125	156	150
3.333	132	164	253	193	170	83	125	115	215	46	88	119	133	120	147	142
3.667	129	158	241	186	161	80	121	111	207	45	83	112	128	114	142	137
4	123	150	237	175	153	76	117	106	201	43	78	106	121	111	135	132
4.333	119	143	229	166	144	73	111	101	193	41	74	98	117	112	132	127
4.667	114	137	217	159	136	69	106	96	185	41	70	93	112	102	128	124
5	110	133	209	150	130	68	105	94	179	46	67	88	107	101	122	120
5.333	106	125	196	142	124	64	100	89	169	39	61	82	101	96	120	115
5.667	101	120	188	134	118	63	97	86	187	39	58	79	97	93	115	112
6	97	114	180	128	114	60	94	83	157	38	55	73	94	90	111	108
6.333	95	110	172	123	109	59	92	79	153	37	52	69	89	88	109	105
6.667	92	105	164	118	105	58	90	78	144	37	50	65	87	85	106	100
7	89	103	157	113	98	56	86	76	139	36	47	62	83	82	101	98
7.333	86	97	149	109	96	53	84	72	133	35	44	59	79	80	99	95
7.667	83	95	144	105	98	52	81	70	127	35	43	56	77	77	95	93
8	82	93	139	102	88	51	81	69	122	34	41	53	75	77	94	90
8.333	80	89	133	99	84	49	77	67	118	35	39	50	72	75	90	87
8.667	80	87	129	96	82	48	77	65	115	34	39	48	71	74	89	85
9	78	86	124	93	80	47	77	65	111	34	37	48	68	73	90	85
9.333	75	84	118	91	77	46	75	62	107	32	35	43	67	71	85	80
9.667	75	82	115	87	75	45	73	60	104	33	34	43	65	69	84	80
10	78	101	115	85	74	49	75	64	101	51	35	41	64	69	85	81
10.333	77	84	112	84	73	45	72	61	99	35	32	39	62	69	82	78
10.667	76	82	109	83	72	45	73	61	98	34	33	39	63	69	82	76
11	75	78	104	80	69	43	70	59	94	33	32	37	61	67	81	74
11.333	74	79	101	79	68	42	71	59	94	32	30	36	60	66	80	73
11.667	72	77	100	79	68	43	69	58	92	32	31	36	61	66	78	72
12	72	76	99	77	68	42	68	56	90	33	31	35	59	66	78	70
12.333	71	75	96	75	66	41	67	56	89	32	31	34	60	65	76	69
12.667	73	76	95	75	66	41	69	57	88	58	31	34	59	66	78	70
13	73	75	95	74	64	41	68	57	88	32	31	33	60	65	76	68
13.333	72	77	93	74	64	42	67	56	88	33	30	32	59	66	76	67
13.667	72	75	92	74	63	42	66	56	85	33	30	31	58	65	75	68
14	72	77	91	73	63	40	67	55	85	32	30	32	58	65	75	66
14.333	73	77	91	71	63	41	66	55	84	33	30	31	58	63	75	65
14.667	73	77	92	71	63	41	68	55	84	33	31	31	58	64	75	65
15	76	78	90	71	68	41	66	55	84	33	31	30	59	64	74	66
15.333	76	78	92	73	62	42	68	58	85	34	31	31	59	65	76	66
15.667	76	79	91	72	63	41	67	57	86	34	33	32	60	66	75	65
16	76	79	91	71	64	41	67	57	84	33	31	31	60	65	80	66
16.333	76	78	90	71	62	40	67	55	85	34	32	31	59	64	74	64
16.667	76	79	92	72	62	40	67	57	85	34	31	31	60	65	74	64
17	77	78	90	71	63	39	67	56	85	33	32	30	59	64	73	64
17.333	77	79	91	71	62	41	67	57	83	34	32	31	59	65	74	64
17.667	77	78	91	71	62	40	66	56	84	33	32	31	60	63	74	63
18	77	78	90	70	63	39	68	57	83	33	32	31	60	65	73	64
18.333	77	77	91	69	63	40	67	58	84	34	34	30	63	64	74	64
18.667	77	77	93	73	63	41	67	57	84	34	35	31	61	65	74	65
19	77	78	91	72	64	39	67	58	84	34	33	31	60	64	75	63
19.333	77	77	92	73	63	40	68	58	85	35	35	31	60	65	75	65
19.667	78	78	91	73	63	41	68	58	85	34	35	32	61	66	74	65
20	79	78	92	72	63	42	68	59	85	34	36	32	61	66	75	65
20.333	79	75	91	73	63	41	67	58	85	34	35	31	61	65	74	64
20.667	78	76	93	73	62	42	69	59	85	34	37	31	61	66	76	65
21	79	76	91	72	62	41	68	57	84	33	37	31	59	65	75	64
21.333	78	75	91	73	63	41	67	59	84	33	37	32	61	66	74	65
21.667	78	75	92	73	62	42	68	59	85	34	38	32	60	66	75	65
22	79	75	93	72	63	42	68	60	85	34	39	33	60	66	75	64
22.333	79	75	92	72	63	43	68	60	85	35	38	33	62	65	77	66
22.667	79	75	92	70	61	43	67	60	85	33	39	32	60	66	76	65
23	78	76	92	72	62	41	69	59	85	33	39	32	61	65	76	66
23.333	78	74	91	70	61	41	67	59	84	32	38	32	59	64	74	65
23.667	80	74	92	71	62	43	69	60	84	33	41	33	60	66	77	66
24	80	75	93	71	62	42	68	60	84	34	41	32	60	66	76	65
24.333	79	73	91	72	61	43	69	59	83	33	41	32	60	66	75	66
24.667	79	74	92	72	61	42	69	61	84	33	43	34	60	65	77	67
25	79	74	92	72	60	42	69	61	85	33	43	33	60	66	78	67
25.333	79	74	90	72	61	43	68	61	84	32	42	33	59	66	77	67
25.667	79	74	91	73	61	42	69	65	85	32	43	33	59	65	78	67
26	79	73	90	71	60	42	69	60	83	30	43	33	58	65	77	66
26.333	81	74	93	72	61	43	70	63	86	32	46	34	60	67	79	68
26.667	80	73	92	71	61	44	69	62	85	31	44	35	58	66	78	67
27	80	94	92	72	61	42	69	62	83	31	45	34	58	67	79	68
27.333	81	75	91	71	61	43	70	63	84	31	47	35	60	66	79	68
27.667	81	74	92	72	62	44	70	63	84	32	47	35	59	65	80	69
28	81	74	91	72	60	44	68	62	83	30	47	34	57	65	79	68
28.333	81	74	92	72	60	44	70	63	83	32	47	35	58	64	80	69
28.667	80	74	91	72	60	44	69	63	82	32	48	36	58	66	80	69
29	79	74	89	72	61	43	70	64	82	31	48	35	58	64	80	69
29.333	79	74	88	71	60	44	68	63	82	31	48	35	58	65	80	68
29.667	78	73	87	70	60	44	69	63	81	30	49	36	58	64	81	68
30	77	72	86	70	59	44	69	63	81	28	47	34	57	67	79	67
30.333	77	72	85	69	58	43	69	63	79	29	49	35	56	64	79	67
30.667	77	73	85	69	58	43	68	63	79	29	48	35	57	64	80	68
31	78	72	85	70	59	44	68	64	80	30	49	36	56	64	80	69
31.333	78	71	85	70	58	44	67	63	78	30	50	36	57	63	80	69
31.667	76	71	83	69	58	43	68	63	78	29	48	35	55	64	80	68
32	75	70	82	68	57	42	67	63	75	28	49	35	56	62	80	67
32.333	75	70	82	70	58	43	67	64	76	28	50	36	55	62	80	67
32.667	73	69	81	67	56	43	65	64	75	29	49	36	53	63	78	67
33	73	69	81	67	57	43	67	63	74	29	50	36	54	62	80	66
33.333	73	68	79	67	56	42	65	63	72	28	50	35	52	61	80	66
33.667	73	68	79	67	56	43	66	63	73	28	50	35	54	61	80	67
34	71	68	79	67	56	43	66	63	73	28	50	35	61	61	81	67
34.333	71	67	78	66	56	43	66	65	72	29	50	36	54	62	80	66
34.667	70	66	77	66	56	42	66	63	71	28	50	35	52	61	81	66
35	70	66	76	65	55	43	65	63	70	27	51	35	54	60	81	67
35.333	71	67	76	65	55	46	65	64	71	28	51	36	52	60	80	68
35.667	69	65	75	65	55	42	64	62	69	28	49	35	52	60	79	66
36	69	64	73	64	55	43	65	63	69	28	51	36	52	59	79	66
36.333	68	65	73	64	54	42	65	63	68	27	51	36	52	59	80	66
36.667	67	64	70	63	54	41,*	63	62	67	27	51	34,*	50	59	78	66
37	56	52,*	59	52,*	43,*	34,*	53,*	53,*	54	17,*	40	24,*	41	48	67	54
37.333	67	63	71	64	53	42,*	63	62	66	29	52	36	51	58	77	64
37.667	66	62	70	62	54	41,*	64	63	66	28	51	37	52	58	78	65
38	65	61	71	63	54	42,*	64	64	66	29	52	37	52	58	79	66
38.333	64	60	69	63	53	42	63	63	64	27	52	36	50	58	78	65
38.667	64	61	68	62	53	42	63	63	64	34	51	36	50	57	76	63
39	64	61	67	61	53	42	64	63	65	27	51	36	50	57	75	64
39.333	63	61	67	62	52	41	64	64	63	27	52	37	50	58	76	62
39.667	63	60	67	61	54	42	64	64	63	28	52	37	51	58	77	66
40	61	59	64	59	52	41	62	63	61	26	51	37	49	57	74	63
40.333	60	59	66	59	52	41	63	64	62	28	52	39	50	57	77	63
40.667	60	59	64	59	52	41	62	63	61	27	52	37	50	56	75	63
41	60	58	63	59	52	41	62	64	61	27	53	39	49	57	75	63
41.333	59	58	63	59	52	41	62	63	61	27	53	37	49	56	75	63
41.667	57	58	62	59	52	41	62	65	61	28	53	73	49	56	75	64
42	59	57	62	59	52	42	62	64	61	27	53	39	50	57	75	64
42.333	57	56	61	59	52	41	62	64	60	27	52	39	48	56	75	63
42.667	57	57	61	58	52	42	63	65	60	27	52	40	50	57	76	64
43	56	58	61	58	52	42	62	64	61	28	53	39	49	57	74	63
43.333	55	57	61	57	51	42	62	65	59	27	53	41	49	56	74	63
43.667	55	57	60	57	51	41	61	64	58	27	53	41	48	56	74	63
44	55	55	60	57	50	42	62	66	58	28	53	40	48	55	73	63
44.333	53	56	58	56	50	41	61	64	58	31	52	40	47	55	73	86
44.667	53	56	59	57	51	40	61	64	57	26	52	40	47	55	73	63
45	54	56	59	56	51	42	61	66	57	27	53	41	48	55	74	63
45.333	53	56	58	56	51	41	62	66	57	27	53	41	47	55	74	64
45.667	53	56	59	57	51	42	63	66	59	28	54	42	49	56	75	63
46	52	56	58	56	51	42	71	65	57	26	52	42	49	55	73	63
46.333	52	57	58	56	50	41	63	67	58	27	54	42	47	55	74	64
46.667	52	56	57	57	51	41	63	67	57	27	53	43	48	56	75	62
47	52	57	58	56	51	41	63	67	57	27	53	44	48	55	75	63
47.333	52	56	57	56	51	42	62	67	56	25	54	43	47	54	74	63
47.667	51	56	57	56	51	42	63	67	57	26	54	43	48	54	75	63
48	52	57	57	56	51	42	62	69	58	27	54	44	47	54	76	63
48.333	52	57	56	55	51	42	63	68	57	26	54	44	48	54	75	63
48.667	52	58	57	56	52	43	65	69	57	27	54	45	48	56	75	65
49	52	58	57	57	51	43	63	68	58	26	55	45	48	55	75	64
49.333	51	58	57	57	51	43	63	69	56	26	55	44	48	55	76	65
49.667	51	58	58	56	50	43	63	69	57	26	54	45	48	54	76	64
50	52	60	58	57	50	43	64	70	58	26	55	46	47	55	77	65
50.333	51	58	57	58	51	42	63	71	57	26	54	47	48	55	76	65
50.667	52	59	58	56	51	42	64	71	59	26	56	46	47	55	76	65
51	52	60	60	57	52	43	64	72	60	26	55	58	48	56	77	65
51.333	52	61	59	58	51	43	66	72	59	25	55	47	48	56	78	64
51.667	52	61	60	57	52	43	64	73	59	27	55	47	49	54	77	65
52	49	58	57	56	50	41	62	70	58	23	52	45	46	53	76	63
52.333	51	60	59	58	51	43	64	73	60	25	56	47	48	54	77	65
52.667	52	61	59	59	53	43	65	75	61	27	55	48	49	56	79	66
53	52	61	60	59	53	43	66	74	60	26	55	48	49	57	78	67
53.333	52	61	60	59	53	44	65	75	61	26	54	49	50	56	79	66
53.667	51	61	59	58	53	44	65	74	60	26	54	49	49	56	78	67
54	51	61	60	59	52	43	65	74	60	25	55	47	49	55	78	66
54.333	50	60	60	60	52	43	65	75	61	26	54	48	49	55	78	66
54.667	49	60	59	59	52	44	64	74	61	26	53	49	49	55	77	66
55	50	59	59	59	53	43	64	74	60	26	54	49	50	55	77	66
55.333	50	58	59	59	52	42	64	75	61	26	53	49	49	56	77	66
55.667	48	59	58	59	53	43	64	74	61	26	53	48	48	56	76	65
56	49	58	59	60	51	42	65	73	60	26	53	50	49	55	78	65
56.333	48	58	58	59	51	42	64	75	61	25	52	50	49	55	76	65
56.667	47	57	57	60	53	42	63	73	60	26	52	49	48	55	76	66
57	46	57	57	58	51	42	63	73	59	25	52	49	49	55	76	64
57.333	46	55	58	58	52	42	63	73	59	25	51	48	48	55	75	64
57.667	45	54	56	58	51	42	63	71	59	25	51	49	48	54	75	64
58	45	54	55	58	51	41	61	72	59	25	50	48	48	55	75	63
58.333	44	54	55	58	50	41	62	71	59	25	50	49	48	53	73	62
58.667	43	53	54	57	51	41	61	71	59	25	50	48	47	54	74	63
59	42	52	55	58	51	42	60	70	59	26	50	48	48	55	74	64
59.333	41	51	54	56	49	40	61	68	58	25	47	47	47	53	73	62
59.667	41	51	54	57	51	40	62	70	57	26	49	49	48	54	73	62
60	42	50	53	57	49	40	60	68	58	25	50	48	46	54	73	61
60.333	41	50	53	59	50	40	60	69	57	26	48	48	47	54	73	62
60.667	39	48	52	57	49	39	59	68	57	26	47	47	46	53	71	61
61	39	47	51	57	49	40	60	68	56	25	46	46	47	53	70	61
61.333	38	46	50	55	48	39	60	65	56	25	46	47	46	53	71	59
61.667	38	46	50	55	49	40	60	66	56	26	46	46	47	53	71	61
62	37	45	48	56	47	38	58	66	54	25	44	46	45	51	70	58
62.333	37	44	49	54	47	38	60	65	54	25	44	45	45	52	71	58
62.667	36	44	48	55	47	37	58	64	55	25	44	45	45	52	68	58
63	35	42	48	54	47	38	57	64	54	26	43	45	45	52	68	57
63.333	35	43	48	54	47	38	59	65	54	26	43	45	45	52	68	58
63.667	35	42	47	53	47	38	58	63	53	26	43	45	44	51	68	57
64	33	41	46	54	46	38	57	63	54	26	42	46	43	51	68	58
64.333	33	41	46	54	48	38	58	63	54	26	42	46	45	52	69	58
64.667	32	40	46	53	46	37	56	62	53	26	41	45	44	53	67	56
65	32	39	45	53	47	37	56	62	53	26	41	45	44	52	67	55
65.333	31	39	44	54	45	37	56	62	52	26	40	44	44	51	67	55
65.667	30	39	43	52	45	37	56	62	52	26	39	44	44	54	66	56
66	31	39	45	52	46	37	56	61	53	27	40	44	44	52	66	55
66.333	31	49	44	52	45	37	56	59	52	27	39	45	45	52	67	55
66.667	30	37	42	51	44	36	54	59	50	25	38	44	43	50	66	53
67	30	36	43	52	45	36	56	60	51	26	37	43	44	51	64	55
67.333	29	36	42	51	44	37	54	59	50	26	38	43	43	51	65	53
67.667	29	37	42	52	44	36	55	59	51	27	38	44	43	51	65	53
68	29	36	41	50	44	36	55	59	50	26	37	44	42	51	64	53
68.333	29	36	41	51	44	37	55	59	50	26	37	43	43	51	65	53
68.667	30	36	41	51	43	36	54	59	49	27	36	44	41	50	64	53
69	28	35	41	49	43	36	54	58	49	25	35	43	41	50	63	51
69.333	28	36	40	50	42	36	54	57	50	25	36	43	42	50	64	53
69.667	28	34	41	50	43	37	53	58	48	26	36	44	42	50	64	52
70	28	35	40	49	42	35	53	58	48	27	36	42	41	49	63	52
70.333	28	35	40	51	42	37	55	57	49	26	36	44	42	49	63	52
70.667	28	35	39	48	46	36	54	55	48	27	35	43	41	48	62	52
71	27	35	40	48	41	35	52	54	48	27	34	42	40	48	60	48
71.333	28	36	40	50	42	37	53	54	49	27	35	44	41	47	61	50
71.667	26	35	38	49	41	36	53	54	47	25	33	43	39	47	61	49
72	27	35	40	49	42	36	52	56	49	26	35	43	41	47	60	49
72.333	27	35	38	49	43	36	53	55	48	25	33	43	40	48	61	49
72.667	28	36	40	50	42	36	53	54	49	27	33	49	41	47	62	49
73	27	35	40	50	41	37	53	55	48	26	33	44	41	48	61	49
73.333	28	35	40	50	42	36	53	55	49	27	35	45	41	48	61	50
73.667	26	36	39	50	43	36	53	55	49	26	34	45	41	49	61	50
74	26	36	39	50	43	36	54	54	49	27	34	45	41	48	60	49
74.333	26	36	40	51	43	39	55	55	49	27	35	47	55	49	61	50
74.667	27	36	40	49	43	38	53	55	50	27	35	46	41	47	61	49
75	26	35	39	51	43	37	55	54	50	27	34	45	42	49	61	49
75.333	26	37	40	52	43	36	54	53	50	26	33	46	44	50	62	49
75.667	26	36	40	52	43	40	54	54	50	25	34	46	43	51	62	50
76	27	36	40	51	44	39	54	53	51	27	34	46	44	50	62	49
76.333	26	38	45	52	44	38	54	53	51	27	35	47	45	50	62	49
76.667	26	36	46	52	43	38	55	53	52	26	34	46	44	50	61	48
77	27	37	40	53	45	39	55	55	52	26	35	48	44	51	62	50
77.333	27	36	41	52	44	38	54	52	51	26	34	46	43	49	60	49
77.667	25	36	39	52	44	38	54	53	52	25	35	48	43	49	62	50
78	26	34	38	53	44	38	54	53	53	25	33	48	44	49	61	49
78.333	26	34	40	52	44	37	54	52	53	26	34	47	44	50	61	50
78.667	24	35	39	52	45	38	53	52	53	25	33	47	44	50	60	49
79	23	34	38	52	43	37	53	51	53	25	32	47	43	49	60	48
79.333	25	34	38	54	46	38	54	52	54	26	34	48	45	51	61	49
79.667	23	33	38	52	44	37	53	51	54	26	33	47	45	49	59	48
80	25	33	38	53	44	38	55	51	56	27	32	47	44	50	60	47
80.333	22	32	38	53	43	37	52	49	53	26	32	46	44	49	58	48
80.667	24	32	39	54	45	38	53	50	55	27	33	47	44	50	60	48
81	23	32	38	53	45	36	53	50	55	26	32	47	44	49	59	48
81.333	23	31	37	52	45	37	63	50	54	26	32	46	44	50	57	48
81.667	23	31	38	53	45	38	52	49	55	27	33	47	44	50	58	47
82	23	30	36	53	45	35	52	50	53	26	31	46	44	49	57	48
82.333	23	30	37	54	44	36	52	48	54	26	32	46	43	49	56	46
82.667	21	29	37	54	44	36	52	48	54	25	32	44	43	50	58	47
83	22	29	38	54	45	37	51	48	54	26	31	45	43	50	58	45
83.333	22	28	37	54	45	36	52	48	54	26	31	45	43	50	57	46
83.667	22	28	37	52	44	36	51	47	54	25	30	44	42	50	56	45
84	21	28	37	53	45	35	50	47	54	27	29	45	50	50	57	45
84.333	22	28	37	54	44	36	52	47	54	27	28	44	44	50	55	45
84.667	20	28	36	52	44	35	50	46	54	26	27	44	43	49	55	45
85	21	26	36	53	43	34	51	45	52	26	28	44	43	49	55	44
85.333	20	26	35	52	44	33	50	45	52	26	26	43	43	51	53	43
85.667	20	25	35	52	43	34	49	45	52	26	26	43	41	49	54	44
86	21	26	36	53	44	35	50	46	54	27	28	43	42	50	54	45
86.333	21	25	36	51	44	34	49	44	53	27	26	42	41	50	53	44
86.667	21	25	36	52	44	35	50	45	53	27	27	43	42	50	54	45
87	20	24	34	52	43	33	49	44	52	25	25	41	41	49	53	43
87.333	21	25	35	52	43	35	49	44	53	27	26	44	42	50	53	43
87.667	20	23	34	51	43	33	48	44	52	26	26	41	42	49	53	42
88	20	24	33	51	42	34	49	43	53	27	26	42	43	50	53	44
88.333	21	23	34	52	43	34	48	43	51	27	25	41	42	49	51	42
88.667	19	23	34	51	42	33	48	43	51	26	24	40	41	49	51	42
89	20	22	33	51	43	33	48	42	52	28	25	41	41	49	51	41
89.333	20	22	33	52	42	34	48	42	52	28	25	40	41	49	51	42
89.667	19	22	32	51	41	32	47	42	51	26	24	39	41	48	51	41
90	19	22	34	52	42	33	48	42	51	27	24	39	42	49	51	42
90.333	19	23	32	51	42	32	48	42	51	27	24	39	40	49	49	40
90.667	19	21	31	50	41	33	47	42	51	27	24	39	41	49	51	41
91	20	22	32	53	41	33	47	43	50	29	24	39	42	48	50	41
91.333	19	22	31	50	41	33	48	41	49	28	24	38	40	49	50	41
91.667	19	21	30	50	41	32	46	41	49	27	23	37	39	48	49	40
92	19	21	30	50	41	31	46	41	48	27	23	37	39	48	49	41
92.333	19	21	31	50	40	31	47	42	50	28	24	38	40	48	49	39
92.667	20	26	31	51	41	31	46	42	50	28	24	39	41	50	49	42
93	18	20	30	50	40	30	46	41	48	27	23	38	39	48	49	39
93.333	19	20	30	50	40	31	46	40	48	27	23	38	39	47	48	40
93.667	19	20	30	49	41	31	47	41	49	27	23	38	39	49	50	41
94	19	20	30	49	41	31	47	41	48	26	22	37	39	47	48	39
94.333	17	20	29	49	38	30	46	41	47	27	22	37	38	48	48	40
94.667	19	21	29	50	39	31	46	41	47	27	23	38	39	48	49	39
95	18	21	30	50	39	31	46	41	47	27	23	38	39	48	47	40
95.333	19	21	29	50	39	31	46	40	47	28	22	37	38	47	47	40
95.667	18	21	29	49	39	31	46	40	47	28	22	38	39	46	47	39
96	19	21	28	49	38	32	47	39	46	27	21	37	38	47	48	40
96.333	21	20	28	49	38	30	45	39	47	27	21	36	37	45	46	39
96.667	19	21	30	50	40	32	46	41	48	29	23	38	40	48	47	40
97	19	21	29	50	39	32	47	41	48	27	22	38	39	47	47	40
97.333	18	20	29	49	40	31	45	40	47	26	21	38	38	46	46	40
97.667	18	20	29	49	39	32	46	40	48	27	21	38	38	47	47	39
98	17	20	29	50	39	31	46	40	48	27	21	37	38	46	47	39
98.333	17	20	29	50	41	31	46	39	49	27	21	38	38	46	46	39
98.667	18	20	29	50	40	31	46	40	49	26	21	38	37	46	45	39
99	18	20	29	50	39	31	46	40	49	27	21	38	38	46	46	39
99.333	18	22	31	51	41	33	47	42	51	27	22	41	40	47	48	40
99.667	19	22	31	52	42	33	47	41	52	28	22	40	40	47	48	41
100	19	22	30	54	42	34	47	41	51	26	23	38	40	47	46	41
100.333	18	22	30	52	42	33	47	41	52	28	22	39	40	47	47	41
100.667	18	21	32	52	42	32	47	39	52	29	21	39	39	47	46	39
101	18	22	32	55	44	33	48	41	54	27	22	40	41	48	48	40
101.333	18	22	32	53	44	33	47	39	55	27	22	39	40	47	47	40
101.667	19	23	33	55	46	34	48	41	55	29	23	40	42	49	48	40
102	18	22	32	55	45	33	46	40	55	27	22	40	40	48	47	39
102.333	18	21	32	55	45	33	47	41	56	27	22	40	41	48	49	41
102.667	20	23	34	56	47	34	48	42	58	28	23	41	42	49	49	41
103	19	22	33	56	46	33	47	40	58	28	23	41	42	48	48	40
103.333	19	22	33	56	46	34	46	41	58	28	24	40	42	49	48	41
103.667	21	23	35	58	47	34	49	42	59	29	24	41	43	49	49	42
104	20	22	34	57	46	34	47	42	58	29	24	42	43	49	49	41
104.333	20	22	34	57	47	33	48	41	57	28	24	41	43	48	48	41
104.667	19	23	35	57	47	34	47	41	59	29	24	41	42	49	49	40
105	19	22	33	59	46	33	47	41	65	29	24	40	42	48	49	40
105.333	21	23	35	58	47	34	48	42	61	30	25	41	43	50	50	41
105.667	20	23	36	58	48	33	48	42	61	29	24	41	44	50	49	42
106	20	22	35	57	48	33	46	41	61	27	24	40	42	50	48	41
106.333	18	21	35	57	46	32	48	41	59	28	23	39	43	48	48	41
106.667	20	22	35	58	48	33	46	41	60	28	23	39	42	50	48	42
107	21	21	34	57	47	33	45	42	60	28	23	38	42	50	49	41
107.333	20	21	33	56	47	33	46	41	60	27	22	38	42	50	48	40
107.667	19	21	34	58	47	32	45	40	58	27	23	39	42	50	48	40
108	20	22	33	56	47	31	45	40	61	27	23	39	42	49	48	40
108.333	21	20	34	57	47	32	46	40	59	28	23	38	43	50	49	41
108.667	21	22	33	56	48	33	46	41	59	29	23	38	42	50	49	40
109	20	20	33	55	46	32	46	40	59	28	22	36	42	50	49	40
109.333	20	20	33	55	46	31	45	40	58	27	22	37	41	48	48	40
109.667	19	20	33	55	46	31	46	41	58	27	22	37	42	48	48	40
110	20	20	33	56	46	31	45	39	58	28	22	36	41	50	48	40
110.333	19	19	32	56	45	31	45	41	57	27	22	37	42	50	48	40
110.667	19	20	32	56	47	31	45	40	57	27	22	36	41	50	48	40
111	21	19	31	54	46	30	46	40	56	28	22	36	42	51	49	40
111.333	19	19	31	55	45	30	44	40	56	27	22	37	42	49	48	39
111.667	21	19	32	55	46	31	45	41	57	28	22	36	42	51	49	41
112	21	20	31	55	45	30	45	41	55	27	21	35	42	51	49	40
112.333	21	20	31	54	45	30	45	41	55	28	22	35	42	52	49	40
112.667	19	18	30	54	44	30	45	40	55	27	21	34	41	51	47	39
113	21	20	31	54	45	29	46	41	55	28	21	35	41	51	48	40
113.333	21	19	30	53	45	29	45	40	55	28	21	34	41	51	48	39
113.667	22	20	30	54	45	30	45	41	55	27	21	35	42	52	49	41
114	21	19	30	53	44	29	45	40	54	27	21	34	41	52	47	40
114.333	21	19	29	53	45	30	45	41	54	27	22	34	41	51	48	39
114.667	20	18	29	52	43	29	44	40	53	26	20	34	41	49	48	39
115	21	18	28	54	44	29	43	40	52	26	21	34	42	51	47	38
115.333	21	19	29	52	43	29	42	40	53	27	20	33	40	51	46	39
115.667	21	18	28	52	43	29	44	40	52	26	20	33	41	51	47	39
116	22	19	29	53	44	30	45	41	53	27	21	34	41	52	49	40
116.333	20	18	29	52	42	29	44	39	52	26	20	33	41	50	47	39
116.667	21	17	29	52	42	29	45	40	51	27	20	33	41	51	48	40
117	21	18	29	52	42	29	43	40	52	26	20	32	40	49	47	39
117.333	20	17	28	51	42	28	43	39	50	26	19	32	40	51	47	38
117.667	22	18	29	52	42	29	44	39	52	27	20	32	41	51	48	39
118	21	17	27	51	41	28	42	39	50	26	19	32	39	51	46	38
118.333	21	17	27	50	41	28	42	37	49	25	18	31	39	49	46	38
118.667	21	17	28	52	42	29	43	39	50	25	20	32	40	50	47	38
119	21	17	27	50	42	28	43	39	50	27	19	32	40	50	47	38
119.333	22	18	28	52	41	29	44	40	51	27	20	33	40	51	48	40
119.667	21	17	27	50	41	28	43	39	49	27	19	31	40	50	46	39

## Sheet: Figure 1 B (GYEC+PEAS LD)
time	TaFRQLUC
0	353	178	185	303	202	304	290	253	291	179	171	217	397	173	395	140
0.333	353	185	201	318	203	294	288	250	293	192	176	217	407	219	403	167
0.667	342	169	183	314	189	274	273	236	275	186	174	206	403	209	395	149
1	327	155	169	309	177	253	257	222	257	177	166	196	402	189	386	134
1.333	313	144	158	299	166	236	240	209	246	167	159	184	391	166	371	123
1.667	303	134	152	293	157	221	231	200	235	161	155	174	376	150	357	113
2	286	125	142	283	149	207	216	189	222	157	150	161	362	135	342	106
2.333	274	118	137	273	139	195	206	181	209	152	144	151	349	126	330	100
2.667	263	112	132	260	134	184	195	171	197	145	138	142	336	116	319	94
3	252	105	126	252	128	177	183	162	188	140	134	135	323	109	308	90
3.333	239	98	122	241	120	164	174	153	175	131	128	125	313	102	297	83
3.667	229	94	118	232	114	156	164	145	167	130	123	120	301	98	285	80
4	219	89	114	220	109	147	155	137	158	124	119	112	288	93	275	79
4.333	212	86	108	211	104	139	147	131	152	120	116	107	277	90	265	74
4.667	201	81	105	200	98	131	136	123	144	116	111	100	263	88	255	71
5	191	78	103	191	95	127	129	117	139	113	109	96	254	86	246	69
5.333	181	73	98	181	89	118	122	110	132	108	103	88	242	82	235	66
5.667	175	72	94	175	86	113	117	105	127	107	102	85	232	81	226	65
6	167	67	93	167	82	107	111	100	121	102	98	81	220	90	216	63
6.333	161	65	90	161	79	103	106	95	117	100	96	77	213	76	208	61
6.667	154	63	88	155	76	96	101	92	113	96	93	74	203	74	201	60
7	148	59	86	149	73	93	99	88	109	96	89	70	193	72	192	60
7.333	141	56	83	145	70	88	96	84	104	91	85	66	184	71	185	57
7.667	137	54	81	148	67	85	90	81	102	89	81	65	178	69	179	56
8	134	53	81	136	65	83	87	78	98	90	82	62	171	69	173	55
8.333	130	52	79	134	64	78	86	75	96	88	79	58	164	67	168	54
8.667	126	50	78	128	62	76	83	72	94	88	78	57	160	67	164	54
9	123	49	78	127	61	74	81	71	92	85	77	56	154	67	159	53
9.333	120	47	76	126	60	71	78	68	89	84	75	53	149	67	154	53
9.667	117	47	84	123	58	70	78	67	87	81	74	51	145	66	150	51
10	117	47	74	123	58	68	75	66	87	80	73	51	142	66	149	53
10.333	114	46	73	118	57	65	76	64	86	81	73	50	138	65	145	53
10.667	113	47	73	119	56	66	75	65	85	80	72	50	136	65	144	53
11	111	46	72	116	56	63	74	63	81	78	70	49	132	65	140	52
11.333	111	45	72	116	55	63	73	62	81	78	71	47	129	66	138	53
11.667	111	46	72	114	55	61	74	62	80	79	71	47	130	66	138	53
12	109	44	72	114	55	62	73	60	80	78	71	46	127	66	136	52
12.333	108	45	72	114	53	61	73	60	80	78	71	46	124	67	134	53
12.667	109	45	72	114	55	61	72	59	79	79	72	46	125	67	134	54
13	107	47	72	115	56	60	73	61	78	80	72	47	122	68	132	53
13.333	108	47	73	114	55	62	74	60	78	78	73	46	122	69	132	55
13.667	107	46	73	114	55	63	73	60	76	79	72	46	120	70	131	55
14	108	48	73	114	55	61	73	60	77	80	73	46	121	70	133	55
14.333	108	47	73	114	55	61	75	59	77	80	74	46	120	72	130	55
14.667	110	48	75	115	56	62	75	60	78	82	74	47	120	72	130	57
15	110	49	74	116	56	61	76	60	77	81	75	47	119	73	130	57
15.333	112	51	75	117	58	63	77	62	78	84	77	48	122	74	131	58
15.667	111	52	76	116	59	63	79	62	78	84	78	48	122	74	129	59
16	112	53	77	117	58	63	78	62	78	85	78	48	122	75	130	60
16.333	112	52	76	116	57	63	78	61	77	85	79	48	121	75	127	60
16.667	114	52	77	116	58	65	82	63	79	86	81	50	121	76	129	61
17	114	53	79	116	59	64	80	63	79	88	82	49	121	77	129	61
17.333	115	54	77	117	59	65	81	63	79	90	82	51	121	78	129	62
17.667	114	55	78	117	60	65	81	63	79	89	82	51	121	78	128	62
18	114	56	79	118	60	67	83	63	79	91	84	52	122	79	130	62
18.333	115	56	79	117	61	67	84	63	79	93	86	53	122	79	130	64
18.667	117	57	80	118	62	69	84	65	79	93	86	54	123	80	129	64
19	117	57	79	117	61	70	85	64	78	99	88	54	122	80	130	64
19.333	117	59	81	119	63	70	86	67	81	95	89	54	124	81	129	66
19.667	119	58	83	118	63	71	85	67	81	97	89	56	125	82	129	66
20	120	59	83	118	63	74	88	67	81	99	91	56	125	82	128	68
20.333	120	59	81	118	62	73	87	67	80	99	90	57	125	82	128	67
20.667	120	60	83	117	64	74	88	67	80	100	93	59	125	82	128	68
21	121	59	82	117	64	74	88	67	80	101	93	58	125	83	127	67
21.333	120	60	83	118	66	76	89	67	81	100	93	59	126	84	129	67
21.667	122	61	84	119	66	76	90	70	81	102	94	60	126	85	128	70
22	121	62	84	117	66	79	89	68	82	102	96	61	128	84	129	73
22.333	123	63	85	118	67	78	90	70	82	103	98	62	127	85	128	70
22.667	122	62	84	116	67	78	90	69	82	103	97	63	127	85	126	69
23	121	63	85	117	68	80	91	69	81	104	97	63	128	86	127	69
23.333	124	63	84	115	67	80	90	69	81	106	99	63	127	85	126	68
23.667	123	63	87	117	68	82	92	70	82	106	99	65	128	87	127	71
24	123	63	84	118	68	82	92	71	83	106	99	66	129	86	125	69
24.333	122	63	86	117	69	83	93	70	82	107	101	66	128	87	126	70
24.667	124	65	86	117	70	85	94	71	85	109	102	68	129	87	126	72
25	124	65	85	117	69	86	94	70	83	110	102	69	130	86	125	72
25.333	125	66	85	116	71	87	94	70	83	109	103	69	130	86	127	71
25.667	125	66	86	117	71	87	95	71	83	110	104	70	130	88	128	72
26	126	65	85	119	70	88	94	70	83	111	105	70	131	87	126	70
26.333	128	68	89	119	72	91	97	72	84	114	107	72	133	89	127	73
26.667	126	67	88	119	72	90	96	72	85	115	106	73	134	89	128	73
27	126	66	87	119	72	91	97	72	84	115	107	74	134	88	128	73
27.333	127	68	87	119	73	91	97	72	86	115	108	74	135	88	128	73
27.667	127	67	87	119	72	93	98	71	85	117	108	75	135	88	128	74
28	127	67	86	118	72	91	96	71	85	116	108	76	136	88	126	73
28.333	128	66	87	120	73	93	97	72	85	117	109	77	137	89	128	73
28.667	126	67	87	118	73	93	96	72	85	118	111	77	136	90	127	73
29	126	66	86	119	72	93	96	72	86	117	111	78	136	89	126	74
29.333	128	66	86	119	72	95	95	70	85	117	111	77	135	89	126	74
29.667	126	65	86	118	72	93	95	72	84	117	110	78	137	90	125	74
30	124	64	85	118	72	93	95	70	84	117	110	77	134	88	125	73
30.333	123	64	83	118	71	93	93	70	82	116	108	78	136	88	124	74
30.667	123	64	83	118	70	93	92	69	83	117	108	78	135	87	122	73
31	124	65	84	116	71	93	94	70	83	118	110	78	136	91	124	75
31.333	122	65	84	117	70	93	93	69	82	117	108	78	134	90	123	74
31.667	121	63	84	117	70	92	91	69	81	116	108	78	134	90	122	74
32	119	62	82	115	68	91	90	68	81	115	108	77	134	88	120	72
32.333	121	61	82	116	68	92	90	68	80	117	106	77	133	88	120	75
32.667	118	61	81	113	66	89	88	66	80	116	107	77	131	89	119	72
33	116	60	80	114	67	88	88	66	80	113	106	76	130	89	119	74
33.333	116	59	80	113	65	87	86	65	78	113	105	76	131	88	117	73
33.667	117	59	80	112	66	87	86	67	78	111	106	76	131	89	117	75
34	115	58	78	111	65	86	85	65	78	111	104	76	129	89	115	74
34.333	114	58	79	111	64	86	83	65	77	111	104	75	128	90	116	75
34.667	113	56	77	110	64	83	84	64	75	109	101	76	128	89	113	75
35	112	56	78	110	64	82	83	64	75	109	101	74	128	89	114	74
35.333	110	56	76	109	63	83	82	64	75	109	101	76	126	89	113	76
35.667	109	54	76	108	62	82	82	62	73	107	100	73	125	89	112	74
36	109	55	75	106	62	81	80	62	72	105	100	73	125	90	111	75
36.333	108	53	76	106	60	80	81	61	73	106	97	73	123	89	110	76
36.667	106	52	74	105	60	77	78	62	71	104	96	71	122	89	108	76
37	94	40	63	94	49	66	68	49	59	90	85	59	112	78	98	65
37.333	104	52	74	104	60	77	78	61	70	103	95	70	121	88	107	75
37.667	103	51	73	104	60	76	78	60	70	103	94	69	121	89	107	76
38	103	52	72	104	59	76	78	61	69	101	95	69	121	90	106	76
38.333	101	50	72	102	58	75	76	59	67	99	93	67	120	90	105	75
38.667	99	49	70	101	57	74	76	59	67	98	91	67	120	89	104	75
39	100	48	70	100	57	74	75	58	66	98	91	64	120	89	105	75
39.333	98	48	70	101	57	74	76	58	65	97	91	64	119	90	103	75
39.667	98	48	69	100	56	73	74	58	66	96	89	63	119	91	103	77
40	97	58	68	98	53	72	74	57	64	95	87	61	117	88	102	74
40.333	97	47	69	98	55	73	74	58	64	95	89	63	118	89	101	75
40.667	95	46	67	97	55	71	72	57	62	94	86	61	116	90	100	75
41	93	45	66	96	55	71	73	57	63	93	87	61	116	90	99	76
41.333	92	45	66	95	54	68	72	57	63	93	86	60	116	89	99	76
41.667	93	46	66	95	53	69	73	57	63	92	84	59	115	89	100	75
42	92	46	65	95	54	69	80	56	63	93	86	59	115	91	100	75
42.333	91	45	66	94	54	71	73	56	62	91	84	58	114	89	98	74
42.667	92	45	64	95	53	69	73	56	61	91	84	58	113	89	97	76
43	92	44	66	96	54	69	73	57	62	91	83	58	112	91	97	75
43.333	91	44	64	94	53	69	73	56	60	90	84	58	114	89	97	74
43.667	91	43	63	94	53	69	72	56	60	90	83	58	112	90	96	75
44	88	43	63	94	53	68	72	55	60	90	82	58	112	90	96	74
44.333	90	43	62	92	52	69	72	56	59	88	81	57	112	88	95	74
44.667	89	43	62	92	52	68	72	56	59	88	83	56	111	89	95	73
45	90	43	62	93	52	68	73	57	60	88	81	56	112	90	95	74
45.333	90	43	63	92	52	69	71	57	59	89	81	58	112	89	96	74
45.667	89	44	63	92	53	69	72	56	60	89	83	57	112	90	96	74
46	89	44	63	92	52	68	71	56	59	89	81	57	110	90	95	74
46.333	89	44	63	93	53	69	72	57	60	88	81	58	112	90	96	74
46.667	90	44	62	93	53	70	73	57	59	87	81	57	111	90	95	73
47	90	44	61	93	52	71	72	57	61	88	82	57	113	90	95	73
47.333	89	44	62	93	53	70	73	56	60	88	80	56	111	89	94	73
47.667	89	44	64	93	53	72	74	57	61	88	82	59	112	89	94	73
48	91	44	62	97	54	72	74	60	60	88	81	58	112	91	95	74
48.333	89	43	61	93	53	72	73	59	61	89	80	58	111	89	94	73
48.667	91	45	64	94	54	74	75	59	62	90	84	60	113	90	97	73
49	91	45	63	95	55	73	74	60	61	92	83	59	111	89	96	73
49.333	92	45	62	96	53	73	75	60	62	90	81	59	113	89	95	73
49.667	92	46	61	95	54	73	75	59	62	91	83	59	113	89	96	72
50	92	46	63	96	56	73	75	60	63	91	84	61	114	89	97	72
50.333	93	46	62	97	55	75	76	60	64	91	84	60	113	89	96	71
50.667	94	45	61	97	56	74	76	61	63	93	84	62	112	88	98	72
51	96	46	64	99	56	80	78	62	65	95	86	62	114	89	98	72
51.333	94	46	61	99	55	76	77	61	65	94	86	62	113	88	98	71
51.667	95	47	61	99	56	76	78	63	65	95	86	62	114	87	97	72
52	93	45	60	99	55	75	76	61	63	93	85	60	112	85	96	69
52.333	96	46	60	101	57	77	77	62	66	95	87	62	114	87	99	71
52.667	98	47	62	113	58	78	78	63	66	98	89	63	114	88	100	70
53	97	48	61	102	58	79	79	65	67	98	90	63	115	87	100	72
53.333	97	47	61	103	58	81	79	64	67	98	89	63	114	87	99	70
53.667	97	47	61	102	59	81	79	64	67	98	89	62	114	87	100	71
54	98	46	60	102	57	80	79	65	67	97	90	62	114	86	100	70
54.333	98	45	60	102	57	80	80	64	68	97	90	62	113	85	99	70
54.667	98	52	61	104	56	79	77	63	68	99	90	62	113	85	100	70
55	97	45	59	103	57	80	79	64	68	98	90	62	113	86	99	69
55.333	97	45	60	103	57	79	78	63	67	98	91	61	113	85	99	68
55.667	97	45	58	103	58	79	78	63	69	99	90	60	110	84	99	68
56	99	44	60	102	57	80	78	64	67	97	90	59	110	83	99	68
56.333	96	43	59	104	56	79	78	61	68	98	88	59	109	83	97	68
56.667	97	43	59	102	57	77	78	62	67	96	88	58	110	83	99	67
57	95	42	58	101	57	77	78	61	66	96	89	57	109	82	97	66
57.333	95	42	57	101	56	77	78	61	66	95	88	57	107	81	97	66
57.667	94	41	56	99	55	77	77	60	66	96	87	57	106	80	96	65
58	95	40	57	101	55	74	77	59	66	95	87	56	105	81	97	65
58.333	93	39	56	101	55	74	76	59	64	93	88	55	105	80	96	64
58.667	93	39	55	99	55	74	77	60	65	93	86	55	105	79	94	65
59	92	39	55	99	54	73	76	61	64	93	87	54	102	79	95	65
59.333	90	37	54	97	53	71	75	58	62	93	84	52	102	79	93	62
59.667	90	37	55	99	53	71	75	59	62	92	85	53	102	80	95	65
60	90	37	53	96	53	69	73	59	62	91	84	51	100	77	93	63
60.333	91	36	54	96	53	71	75	59	62	91	84	52	100	78	92	64
60.667	88	35	53	96	51	68	74	58	60	90	82	51	98	77	92	61
61	89	35	54	94	51	68	72	58	60	88	82	49	97	77	90	62
61.333	87	33	52	93	51	67	73	57	59	87	81	49	96	75	90	61
61.667	87	33	52	94	52	66	73	56	59	86	81	48	95	76	90	61
62	85	32	51	93	50	65	71	55	58	87	78	47	94	74	88	59
62.333	86	32	51	92	51	64	72	56	57	84	79	46	93	75	90	59
62.667	84	31	50	91	50	64	70	56	57	84	78	47	93	73	87	59
63	83	30	50	90	49	63	70	54	55	83	78	45	92	74	87	59
63.333	84	31	49	90	50	63	71	56	56	83	78	45	92	73	87	59
63.667	82	30	50	90	48	62	71	56	56	84	77	43	90	72	86	58
64	81	30	50	89	47	62	70	55	55	81	75	44	89	71	86	58
64.333	83	29	50	88	50	62	70	55	55	82	76	43	90	72	87	58
64.667	81	29	49	88	49	61	70	54	54	80	76	42	89	72	84	56
65	80	29	50	87	48	60	69	54	52	79	75	41	88	71	85	57
65.333	80	28	48	87	48	59	69	54	53	80	74	41	87	70	83	57
65.667	80	28	48	86	48	59	68	53	52	79	72	40	87	69	82	56
66	79	28	48	86	48	59	69	54	51	79	73	40	87	71	83	56
66.333	78	28	48	87	48	58	69	54	52	79	73	40	87	70	83	55
66.667	78	26	47	85	47	57	67	53	50	77	72	39	84	68	81	54
67	78	26	48	84	48	58	67	52	51	76	71	39	84	69	81	54
67.333	77	25	47	84	47	57	66	54	49	77	71	39	83	68	80	54
67.667	79	25	47	84	47	57	67	53	50	76	72	39	84	68	80	54
68	77	26	46	83	47	56	67	53	50	76	70	38	83	68	80	54
68.333	77	26	47	83	47	56	66	53	49	75	70	38	83	67	80	53
68.667	76	26	47	82	47	56	65	52	49	75	70	38	82	66	80	54
69	75	25	47	81	46	56	65	52	49	74	69	37	82	66	78	52
69.333	76	25	46	83	47	55	66	53	49	75	69	37	81	65	79	52
69.667	77	25	47	82	47	56	66	53	47	75	68	36	82	66	80	51
70	75	25	44	82	47	56	66	53	48	75	69	37	79	65	79	52
70.333	76	25	47	81	47	54	65	53	48	74	69	37	82	64	78	51
70.667	76	25	46	82	47	56	64	53	48	74	68	37	79	64	77	51
71	75	25	45	80	45	56	62	52	48	74	69	36	80	63	77	51
71.333	77	26	45	82	46	55	64	52	49	75	69	37	80	64	77	51
71.667	75	24	45	80	45	54	62	51	46	74	68	35	79	63	76	48
72	76	25	45	82	46	55	64	53	49	75	68	37	81	63	77	49
72.333	75	25	44	80	46	55	62	52	48	74	68	36	80	62	75	48
72.667	76	27	45	98	46	56	62	52	48	76	69	37	80	61	77	49
73	76	26	45	81	47	57	63	52	48	75	68	37	81	61	78	48
73.333	76	27	44	82	46	57	63	53	48	76	70	37	82	62	77	48
73.667	76	26	46	81	46	57	64	53	49	76	70	36	81	61	78	47
74	77	27	45	83	46	58	63	53	49	77	70	38	80	60	76	47
74.333	78	28	45	84	47	59	63	54	50	78	70	38	81	61	77	48
74.667	78	28	45	82	47	59	63	55	50	77	71	39	81	62	77	48
75	78	27	45	83	48	59	63	53	50	80	72	39	82	60	77	47
75.333	77	27	45	84	47	60	63	54	51	78	72	38	83	60	77	47
75.667	81	28	45	83	48	60	63	54	51	80	72	39	83	61	78	47
76	78	28	45	83	49	61	64	55	52	81	75	39	85	61	78	46
76.333	79	29	45	86	49	62	64	54	52	82	76	40	85	61	78	47
76.667	79	29	46	85	48	63	65	55	53	81	74	40	85	60	79	46
77	79	29	47	86	50	62	65	56	53	83	75	41	87	61	80	46
77.333	79	29	46	85	49	63	65	55	52	83	77	41	86	59	79	46
77.667	78	28	46	85	49	63	64	55	53	82	76	40	86	60	79	45
78	80	27	46	85	49	63	65	54	53	83	77	40	86	59	81	45
78.333	81	28	45	86	49	63	65	55	53	84	91	41	87	59	80	45
78.667	80	27	45	86	49	63	66	56	53	85	77	40	87	57	80	45
79	78	27	44	85	49	62	65	55	52	84	78	41	86	57	78	44
79.333	81	28	46	86	50	62	65	56	54	86	79	40	88	58	80	45
79.667	79	27	45	86	50	63	64	55	53	84	79	40	87	58	80	43
80	80	28	45	86	50	62	65	57	53	86	80	40	89	57	82	44
80.333	79	27	44	86	48	62	64	56	53	85	79	40	85	56	80	42
80.667	79	28	48	86	50	64	65	56	53	85	80	40	87	57	80	42
81	79	28	45	85	49	63	65	55	53	85	79	39	86	55	80	42
81.333	78	26	43	87	48	62	65	55	52	84	79	39	87	55	81	42
81.667	79	27	44	85	49	62	65	55	54	86	80	39	87	56	80	43
82	77	26	44	85	48	61	64	54	52	84	78	39	86	55	80	42
82.333	77	25	43	85	49	62	64	54	52	83	78	39	84	54	80	41
82.667	77	25	44	85	49	60	63	54	51	83	77	36	84	54	79	41
83	77	25	44	85	49	61	64	54	51	83	79	36	83	55	78	40
83.333	76	25	43	84	47	61	63	54	50	83	77	36	83	54	81	40
83.667	76	25	43	84	48	60	63	52	50	82	77	36	82	53	78	40
84	76	25	43	83	47	60	63	54	52	83	78	35	83	54	79	40
84.333	76	25	44	83	47	60	62	53	51	82	78	37	82	53	79	40
84.667	75	24	42	82	47	59	61	52	49	80	76	35	81	52	78	39
85	76	24	42	83	45	59	62	52	48	81	76	34	81	52	78	39
85.333	74	23	42	82	46	58	61	51	48	79	75	34	80	51	78	37
85.667	74	23	42	81	45	58	61	52	48	78	76	33	80	51	77	37
86	75	24	43	82	47	58	61	52	49	80	76	34	79	51	76	37
86.333	74	23	41	80	46	58	61	51	47	78	75	33	79	51	77	37
86.667	73	23	42	82	45	58	61	51	47	77	76	33	78	51	76	38
87	72	22	41	79	45	56	59	50	46	77	74	31	78	48	76	36
87.333	74	23	41	80	44	56	60	50	47	77	76	32	77	49	76	37
87.667	72	21	41	80	45	55	59	49	45	76	73	31	75	49	75	35
88	73	22	42	80	45	55	61	50	45	76	74	31	76	49	74	36
88.333	72	22	40	77	44	55	60	48	45	75	73	30	75	49	75	35
88.667	71	21	40	78	44	54	59	48	45	74	72	30	74	48	74	34
89	71	21	40	77	44	54	58	48	44	75	73	30	74	48	74	34
89.333	71	20	40	78	43	53	59	48	44	73	72	29	73	48	74	34
89.667	70	20	40	77	42	53	58	49	43	73	70	29	74	46	72	33
90	70	20	40	78	44	54	59	48	43	72	70	30	74	47	74	35
90.333	69	20	39	76	44	53	57	46	43	73	70	28	72	46	72	33
90.667	69	20	40	76	42	52	58	46	43	71	71	27	72	49	72	33
91	70	20	39	76	43	52	58	47	43	72	70	28	70	45	72	33
91.333	69	19	39	75	42	52	57	46	43	71	69	27	70	44	72	33
91.667	68	18	38	75	41	52	57	46	41	69	67	27	70	44	70	31
92	67	18	38	74	40	50	56	46	41	69	67	26	69	44	70	33
92.333	67	19	39	75	41	51	56	46	41	70	67	26	70	44	72	33
92.667	68	19	39	76	41	51	58	47	41	69	68	26	68	44	72	33
93	65	18	37	73	40	49	56	44	40	67	66	26	67	44	70	32
93.333	67	18	38	74	41	52	56	45	40	68	65	26	68	43	70	31
93.667	67	19	39	74	41	51	56	45	41	68	65	26	68	43	71	32
94	66	18	38	74	41	51	56	45	40	67	64	25	67	43	70	32
94.333	67	18	38	74	39	50	55	45	39	67	64	25	67	42	70	31
94.667	67	18	38	74	40	50	56	45	40	68	64	29	67	43	70	31
95	66	18	37	73	40	50	55	45	39	68	65	25	67	42	70	31
95.333	66	16	37	72	40	49	54	44	38	66	65	25	66	41	69	30
95.667	66	17	38	73	39	50	55	44	39	67	64	25	65	42	69	29
96	65	17	37	73	40	50	53	45	39	67	64	25	65	41	68	29
96.333	64	16	37	72	39	49	52	44	38	65	62	23	62	40	66	29
96.667	64	17	38	73	40	50	54	45	39	65	64	25	65	40	69	30
97	66	18	38	73	40	51	53	45	40	66	64	25	64	41	68	30
97.333	63	17	37	72	40	51	53	45	38	66	63	25	63	40	67	30
97.667	64	16	36	72	39	52	52	44	38	65	62	25	64	40	67	29
98	65	17	37	72	39	52	52	45	40	65	62	25	63	39	67	29
98.333	66	16	36	72	39	52	52	46	39	66	63	25	64	38	67	29
98.667	64	16	37	73	40	53	52	45	40	66	64	25	63	39	67	30
99	65	16	36	72	40	53	53	46	40	67	64	25	66	39	68	28
99.333	66	17	37	74	41	53	54	46	42	69	65	26	66	39	69	29
99.667	67	17	37	74	41	53	53	48	42	69	66	25	66	37	69	29
100	66	17	38	72	40	54	53	47	41	68	65	26	66	38	69	28
100.333	66	16	37	74	40	54	54	47	42	69	66	26	65	38	68	28
100.667	66	16	36	75	40	53	53	47	42	70	66	26	65	37	68	27
101	66	17	38	74	41	55	54	48	42	70	68	25	67	38	70	27
101.333	66	16	36	74	40	54	54	48	42	71	66	25	67	37	69	27
101.667	68	18	38	76	42	55	55	48	45	73	68	27	68	39	70	28
102	68	17	37	75	41	55	55	47	42	72	68	26	67	36	69	27
102.333	68	18	37	76	41	55	55	49	43	72	69	27	68	38	71	28
102.667	68	18	38	77	41	55	55	50	45	75	70	27	70	38	71	27
103	68	18	37	77	42	57	55	49	44	73	70	26	69	38	71	27
103.333	68	17	37	77	42	55	56	48	44	74	69	26	69	38	70	27
103.667	70	18	39	78	41	57	57	50	46	75	72	27	70	38	72	28
104	69	19	38	78	41	57	56	48	45	75	71	26	70	37	72	27
104.333	69	18	37	77	42	55	55	50	45	74	71	26	70	37	72	27
104.667	68	18	37	77	41	56	57	49	45	74	72	27	71	36	71	27
105	68	17	37	78	40	56	55	49	44	74	71	26	70	36	73	26
105.333	70	19	39	78	42	55	58	49	45	76	72	27	71	37	73	27
105.667	69	18	38	79	42	55	57	50	45	76	73	27	71	37	73	28
106	69	18	37	77	41	55	56	48	44	75	73	26	69	36	73	26
106.333	68	17	39	79	41	54	56	48	44	75	72	25	70	36	72	26
106.667	68	18	38	78	41	54	57	49	45	75	72	25	69	36	73	27
107	68	17	38	77	41	54	57	47	45	75	72	25	69	36	73	27
107.333	68	18	37	77	39	53	56	47	44	75	72	24	68	36	72	25
107.667	68	18	39	77	40	53	56	47	44	75	72	24	68	35	73	26
108	68	19	37	76	39	53	56	47	43	75	72	23	69	37	72	25
108.333	68	18	38	77	40	52	57	47	43	74	71	24	68	37	73	26
108.667	68	18	39	77	41	52	56	47	45	75	72	23	68	36	71	26
109	67	17	38	77	40	51	56	46	43	73	70	23	67	35	73	25
109.333	66	18	37	76	38	51	56	45	43	73	70	23	66	34	72	25
109.667	67	17	37	75	38	51	55	46	42	72	70	22	67	34	70	25
110	65	17	37	74	37	49	55	46	41	71	69	22	65	33	69	25
110.333	65	17	38	75	39	49	54	44	42	71	69	21	65	34	70	24
110.667	65	17	37	74	38	49	54	43	42	70	69	21	64	33	69	25
111	65	17	37	73	38	49	54	44	41	70	69	22	64	34	70	53
111.333	64	17	37	73	37	48	54	44	40	70	68	21	63	33	69	24
111.667	66	18	37	74	38	49	54	44	41	70	68	20	65	33	70	25
112	64	17	37	73	36	48	53	43	41	69	66	20	64	32	69	24
112.333	64	17	37	73	37	48	54	43	40	68	68	21	63	33	69	24
112.667	63	17	36	71	37	46	53	43	39	68	67	20	62	31	68	23
113	65	17	45	73	38	48	54	43	40	68	67	20	63	33	69	24
113.333	63	17	37	72	37	46	54	43	40	68	66	20	62	32	69	24
113.667	65	18	37	72	37	46	54	43	40	67	66	20	62	33	69	25
114	64	17	37	72	36	46	54	44	40	67	65	20	61	32	68	24
114.333	63	17	37	72	38	47	54	43	40	67	65	20	62	33	68	24
114.667	62	16	36	71	36	43	53	42	37	64	64	19	60	32	68	23
115	63	17	37	71	36	45	53	42	38	65	64	19	60	32	68	24
115.333	63	17	35	71	36	45	53	41	38	65	70	19	60	31	67	24
115.667	62	16	36	69	36	45	53	41	39	64	63	19	60	31	67	24
116	63	17	38	70	36	45	54	42	38	66	64	18	60	32	67	24
116.333	61	17	37	69	35	44	53	41	37	63	63	18	59	31	67	23
116.667	61	17	37	69	35	43	54	41	37	62	63	18	60	32	68	24
117	60	16	35	70	35	43	52	41	37	63	61	18	59	31	67	24
117.333	60	16	35	69	34	46	51	40	36	62	60	17	57	31	66	22
117.667	61	17	37	70	35	43	53	41	36	62	62	18	58	31	67	23
118	60	15	34	68	34	41	53	40	37	62	61	16	57	30	69	23
118.333	61	16	35	69	33	43	52	39	35	61	60	17	57	30	66	22
118.667	61	17	36	68	34	42	53	40	37	62	60	16	59	30	66	23
119	60	17	35	68	35	42	52	40	36	60	61	17	58	31	66	23
119.333	62	17	36	69	35	42	52	40	37	61	61	17	58	31	66	23
119.667	60	16	35	67	34	41	52	39	35	61	60	17	56	30	65	22

## Sheet: Figure 1 C. (GYEC+PEAS LL)
Time	TaFRQLUC
0	133	224	423	206	226	487	514	421	546	515	280	319	247	236	349	221
0.333	125	210	371	189	229	433	497	413	546	496	281	306	229	213	342	234
0.667	117	196	317	158	188	359	479	395	429	476	256	282	198	181	313	213
1	111	182	276	135	152	309	461	372	345	456	230	262	171	158	285	189
1.333	101	175	243	118	132	278	439	353	295	435	208	248	155	141	263	174
1.667	92	167	222	108	116	253	422	339	263	413	188	238	141	128	246	163
2	86	160	206	98	105	233	402	321	242	394	174	224	129	118	230	151
2.333	80	151	189	92	96	217	383	304	227	376	163	214	120	111	214	142
2.667	76	145	178	85	90	203	368	289	214	358	153	205	111	104	200	132
3	71	140	165	80	85	189	349	275	201	339	146	199	106	97	190	125
3.333	66	132	155	74	79	177	332	259	188	321	136	191	101	91	178	118
3.667	63	125	144	70	74	166	316	245	179	302	130	187	92	86	170	112
4	60	118	136	68	68	155	301	229	170	287	124	182	86	81	161	110
4.333	58	112	128	63	67	147	286	216	164	271	119	179	80	77	153	107
4.667	56	108	121	60	64	139	273	203	154	256	114	175	77	74	147	105
5	54	102	114	56	60	132	257	189	146	240	109	172	71	68	139	101
5.333	51	97	107	53	56	125	244	177	140	226	103	166	67	64	132	97
5.667	50	93	101	51	55	118	236	167	131	213	100	164	64	63	129	97
6	49	89	96	48	51	113	224	156	126	201	96	162	59	59	124	95
6.333	47	85	91	46	49	109	215	145	120	190	91	157	57	56	120	94
6.667	46	80	86	43	46	102	203	135	114	180	88	155	54	53	115	92
7	45	76	81	41	43	97	195	127	108	170	85	152	51	50	109	90
7.333	45	73	79	40	42	94	188	122	104	162	81	151	48	47	108	89
7.667	43	70	74	37	40	89	182	115	99	153	80	147	46	46	104	87
8	44	67	72	36	39	87	174	109	94	147	79	146	44	45	101	87
8.333	42	63	68	35	38	84	171	104	91	140	77	144	42	42	99	86
8.667	42	61	67	34	36	82	165	100	88	134	74	143	41	41	96	86
9	43	59	65	33	35	79	158	94	84	129	73	141	39	39	94	84
9.333	42	57	62	32	34	78	154	90	82	124	72	141	38	38	93	84
9.667	41	56	62	30	32	75	150	87	80	120	71	141	36	36	91	84
10	42	56	61	30	32	74	146	84	79	117	71	137	35	35	89	85
10.333	43	55	59	30	31	73	144	81	77	114	70	139	35	34	87	84
10.667	42	52	59	27	31	71	140	78	76	110	69	137	33	33	86	84
11	42	52	59	27	30	70	139	77	73	107	69	137	33	33	85	85
11.333	43	52	57	27	30	71	136	75	72	106	69	137	33	31	86	85
11.667	43	52	58	26	28	69	136	74	71	102	69	137	32	31	85	84
12	43	51	57	26	29	69	134	72	70	103	69	136	31	31	84	84
12.333	43	51	56	26	28	70	133	71	69	100	70	136	30	31	84	85
12.667	44	51	57	26	29	69	130	70	70	98	70	137	31	31	85	86
13	46	51	58	26	29	70	131	70	71	99	71	137	30	31	85	86
13.333	46	52	57	26	29	69	129	69	69	95	70	138	30	31	84	85
13.667	47	52	57	26	28	69	130	69	69	96	72	137	31	31	85	87
14	47	52	57	26	29	70	129	69	69	94	73	138	30	30	85	87
14.333	48	52	58	26	28	69	128	68	69	94	74	139	30	31	85	89
14.667	48	53	58	25	28	68	127	67	68	91	73	140	29	29	84	87
15	50	54	58	25	29	69	128	66	68	92	75	141	30	32	86	87
15.333	51	55	59	26	29	71	129	68	69	90	75	140	30	30	86	88
15.667	52	56	58	26	28	72	128	67	67	91	77	141	31	31	86	88
16	53	56	58	27	28	71	128	68	69	90	77	143	31	30	86	89
16.333	54	57	59	26	28	71	127	67	69	89	76	142	29	30	87	88
16.667	56	60	61	27	30	71	127	69	69	89	78	144	31	32	86	89
17	57	60	60	28	30	72	128	69	70	87	79	144	31	32	89	89
17.333	58	61	60	27	29	71	127	68	69	86	79	145	31	31	87	88
17.667	58	62	59	27	30	71	127	68	68	86	81	144	30	31	88	89
18	60	64	60	28	30	72	127	69	69	85	81	145	31	31	88	89
18.333	59	63	59	26	28	70	124	67	67	82	78	144	30	30	86	88
18.667	61	65	60	27	30	71	126	70	67	83	81	146	31	31	89	89
19	63	65	60	27	30	71	127	69	67	82	81	145	31	31	87	88
19.333	65	68	59	29	31	72	127	70	67	81	82	146	31	31	89	88
19.667	65	69	61	29	31	73	127	70	68	81	82	147	32	31	88	90
20	66	71	60	29	31	71	127	70	68	80	83	146	31	32	87	89
20.333	68	72	59	29	30	70	127	70	68	80	83	147	33	32	88	89
20.667	68	73	58	28	30	70	125	70	65	77	83	145	30	32	87	89
21	70	74	58	29	32	69	125	71	65	76	83	146	31	32	87	89
21.333	70	76	58	30	32	69	126	71	66	75	84	146	33	32	88	89
21.667	70	74	58	30	31	69	124	71	65	75	83	144	32	31	87	89
22	71	78	57	30	31	69	123	70	63	74	84	146	32	31	87	89
22.333	71	79	57	30	32	68	122	71	64	74	83	145	33	32	87	89
22.667	72	79	57	31	32	68	123	71	63	74	86	144	32	32	87	90
23	72	81	56	30	32	67	120	70	62	72	84	144	32	31	86	89
23.333	72	82	55	31	32	65	118	70	62	71	83	143	32	31	85	89
23.667	72	81	53	31	32	65	117	70	61	71	84	142	32	31	86	88
24	73	84	58	32	32	66	117	71	60	70	85	142	32	31	85	88
24.333	74	85	54	32	33	65	118	71	60	70	85	140	32	31	84	89
24.667	72	84	52	31	32	64	116	71	58	69	84	141	31	31	82	88
25	73	84	52	31	32	63	115	70	57	67	85	139	31	31	82	88
25.333	73	87	51	31	33	63	114	71	58	67	85	137	31	30	82	87
25.667	72	88	50	31	33	60	112	71	61	67	84	138	31	30	82	87
26	74	89	50	32	33	61	111	70	55	66	85	136	32	31	81	87
26.333	74	89	50	32	32	60	110	71	55	65	84	134	31	30	81	86
26.667	73	89	49	31	32	59	110	70	54	64	84	134	31	29	79	85
27	74	91	49	32	33	60	108	70	54	64	84	132	31	31	79	87
27.333	73	90	47	31	32	58	107	71	53	63	84	132	30	30	77	84
27.667	72	91	48	32	33	57	107	70	52	63	84	131	31	30	77	85
28	73	92	47	33	33	57	104	71	53	63	84	130	31	31	77	85
28.333	72	92	46	31	31	56	103	69	51	62	83	129	30	29	75	84
28.667	72	93	47	32	33	56	102	69	52	61	82	127	31	31	76	83
29	72	92	46	31	32	55	100	70	51	61	82	125	30	29	73	84
29.333	70	91	48	32	32	53	98	68	49	60	81	123	29	29	73	82
29.667	71	90	45	32	31	53	97	68	48	59	81	123	29	28	71	82
30	70	88	44	31	31	52	95	67	48	57	80	121	29	28	70	82
30.333	72	88	44	31	32	53	94	66	48	58	80	120	29	28	69	82
30.667	71	88	43	30	31	52	92	67	48	57	79	120	29	28	68	83
31	70	86	44	30	31	50	90	66	48	55	78	118	29	28	67	81
31.333	70	86	43	30	30	51	88	65	47	56	77	116	27	28	65	80
31.667	69	83	43	30	30	50	88	64	46	55	75	115	28	28	64	79
32	69	82	42	29	30	50	86	65	46	55	74	115	27	27	63	80
32.333	68	81	41	29	29	50	84	63	45	53	72	112	26	27	61	79
32.667	68	80	41	28	29	48	83	61	45	54	73	111	26	27	60	78
33	67	78	40	29	29	48	84	61	44	53	71	110	26	27	59	78
33.333	67	78	40	29	29	49	80	61	45	53	70	109	27	27	60	78
33.667	69	78	41	30	29	48	80	60	44	52	70	108	26	27	58	78
34	68	75	41	29	29	48	78	60	44	50	69	106	26	27	57	78
34.333	66	74	39	27	28	46	77	58	43	50	67	105	24	25	55	76
34.667	66	73	39	26	27	45	76	57	43	50	66	105	24	25	54	75
35	67	73	40	28	27	47	75	57	43	50	66	104	24	26	53	76
35.333	65	70	39	27	26	45	72	56	42	49	64	101	24	25	52	76
35.667	65	71	38	27	27	46	72	57	42	50	64	102	24	26	51	75
36	65	69	38	27	26	46	72	55	42	49	62	101	24	25	50	75
36.333	65	69	39	28	26	46	70	65	42	48	62	100	24	26	50	74
36.667	65	68	39	28	27	46	70	55	41	49	61	99	24	26	50	74
37	65	65	37	26	25	45	69	54	41	47	60	97	23	24	48	72
37.333	65	66	37	26	25	44	68	52	40	48	58	96	22	24	47	73
37.667	63	64	37	26	25	43	68	52	41	47	57	96	22	24	46	72
38	64	65	38	26	25	44	67	52	40	47	58	96	23	24	47	73
38.333	64	63	36	26	25	44	65	52	42	47	56	94	22	25	45	72
38.667	64	63	37	26	25	44	65	50	40	47	56	94	22	24	45	72
39	62	62	35	26	24	43	64	49	40	46	54	92	21	24	44	70
39.333	64	61	36	26	25	42	64	50	40	46	54	90	22	24	44	70
39.667	64	61	36	26	26	43	64	49	40	47	53	91	23	24	44	71
40	62	60	35	25	24	42	62	48	39	45	52	89	21	24	42	69
40.333	62	60	36	26	26	43	63	50	39	46	53	89	22	24	43	70
40.667	62	60	35	25	23	41	62	47	38	45	51	87	20	23	41	69
41	63	60	35	26	25	42	61	49	39	46	51	88	21	24	41	71
41.333	63	60	36	26	25	42	62	48	38	46	53	87	22	24	41	70
41.667	63	59	36	25	24	41	60	47	38	46	50	86	20	28	40	68
42	64	59	35	25	25	41	61	47	39	46	50	84	22	27	41	68
42.333	63	58	34	25	23	42	60	46	38	47	49	84	21	24	39	67
42.667	63	60	34	26	24	42	60	47	38	45	49	84	21	24	39	68
43	62	58	34	25	24	41	60	46	38	45	48	81	21	24	39	67
43.333	63	59	34	26	24	41	60	46	38	46	48	83	21	23	39	67
43.667	63	60	35	26	24	41	58	46	38	46	47	80	21	25	39	67
44	64	59	35	25	23	40	60	46	38	46	47	81	21	24	38	66
44.333	63	60	34	25	24	40	60	45	38	47	46	80	21	23	37	65
44.667	62	59	33	25	24	40	61	45	38	46	47	78	21	23	37	66
45	63	60	34	26	23	40	63	46	38	46	46	77	21	24	38	65
45.333	63	59	33	25	23	39	65	44	37	45	46	77	19	23	37	65
45.667	63	62	33	26	24	39	68	46	38	46	47	77	21	24	37	65
46	63	62	33	26	24	40	69	44	37	47	46	76	21	23	37	65
46.333	64	62	34	25	24	40	71	44	37	46	46	75	21	25	38	65
46.667	64	63	33	26	24	39	71	44	37	47	45	75	21	24	37	64
47	62	63	32	25	23	39	71	44	36	46	45	73	19	23	37	64
47.333	62	62	31	25	23	37	71	44	35	46	45	73	20	23	37	63
47.667	62	62	32	26	24	39	72	44	36	47	45	74	21	23	37	63
48	62	64	32	26	24	38	72	43	37	46	46	71	21	23	37	63
48.333	62	62	31	26	24	38	73	43	37	47	46	70	20	23	36	62
48.667	64	64	32	25	23	38	74	43	37	47	47	69	20	22	36	62
49	63	66	32	25	24	38	73	44	37	48	48	70	21	22	39	62
49.333	64	68	33	26	25	39	76	46	37	51	50	70	21	23	36	62
49.667	63	66	31	25	24	38	76	44	37	50	49	68	21	23	36	62
50	65	70	32	27	26	39	78	45	38	51	49	68	22	24	37	62
50.333	64	71	32	27	24	39	78	45	37	52	51	67	21	23	36	63
50.667	64	72	32	27	25	39	79	46	38	52	51	67	22	24	37	62
51	65	72	32	26	26	39	79	50	38	52	51	66	22	24	37	61
51.333	65	75	32	27	26	40	80	46	38	52	54	66	22	23	37	61
51.667	64	74	32	27	25	38	80	46	37	52	51	65	23	24	36	60
52	64	75	31	27	26	38	81	46	37	52	51	64	22	24	40	61
52.333	62	75	32	27	25	38	81	46	37	52	51	65	22	23	36	60
52.667	64	77	31	27	25	38	81	48	37	51	49	62	22	23	36	59
53	64	76	32	28	26	38	81	46	37	52	50	63	22	23	36	60
53.333	64	75	31	26	24	37	79	46	37	51	48	61	22	22	35	59
53.667	63	76	31	27	26	37	80	47	37	51	48	62	22	24	36	60
54	63	77	32	28	26	38	79	47	38	52	48	63	23	24	36	59
54.333	62	76	30	27	26	36	80	45	37	50	47	60	21	23	35	58
54.667	63	77	31	27	26	37	79	47	37	51	57	62	22	24	35	59
55	63	76	31	27	25	37	78	47	36	50	47	60	22	24	34	58
55.333	63	76	30	27	25	37	79	47	38	51	47	61	22	23	35	57
55.667	63	76	31	28	25	37	79	47	36	50	46	59	22	24	34	58
56	63	76	29	27	25	36	78	47	37	50	45	60	22	24	36	57
56.333	61	76	31	27	25	37	77	45	36	49	46	58	22	24	34	58
56.667	61	75	30	26	25	35	75	45	36	49	45	58	21	23	32	56
57	61	75	31	27	25	37	77	46	36	57	46	57	22	24	33	57
57.333	60	73	29	26	25	35	75	46	35	50	44	57	22	23	32	56
57.667	61	74	30	27	25	35	74	46	37	49	44	57	22	24	33	56
58	60	73	29	27	24	35	75	45	36	49	43	57	22	23	31	56
58.333	59	71	29	27	24	35	74	46	37	48	43	56	21	23	31	56
58.667	59	71	29	25	24	36	72	44	35	48	42	55	21	22	30	56
59	60	71	30	26	24	35	73	45	36	47	41	55	20	23	31	56
59.333	59	68	28	26	24	34	71	44	35	47	41	55	21	22	30	55
59.667	59	68	29	26	24	35	70	44	35	46	41	54	20	22	29	57
60	59	70	28	25	24	35	70	44	36	46	40	54	21	23	29	54
60.333	58	67	28	25	24	35	70	44	35	46	41	54	21	23	29	55
60.667	58	65	29	25	23	35	68	43	35	45	42	52	20	23	28	55
61	58	65	28	25	23	34	68	43	36	45	39	52	20	22	28	54
61.333	58	64	29	25	23	34	67	42	35	45	38	51	20	22	28	54
61.667	56	62	27	24	23	33	66	42	35	44	38	50	19	22	27	54
62	58	62	28	25	23	34	67	43	36	45	39	51	20	23	27	55
62.333	57	61	28	25	23	33	66	42	35	44	38	50	19	22	27	53
62.667	57	60	27	28	23	33	65	40	36	44	37	50	19	22	27	54
63	55	59	28	24	23	33	64	41	36	43	36	49	20	22	26	53
63.333	57	59	28	24	23	33	65	42	36	43	37	49	20	23	26	54
63.667	56	58	28	24	22	34	64	40	35	43	37	49	20	22	26	53
64	56	58	28	24	23	32	63	40	35	42	36	48	20	22	25	53
64.333	55	56	27	24	22	32	62	40	35	42	36	47	18	22	25	51
64.667	55	56	27	24	23	33	62	41	36	42	36	48	19	23	25	52
65	55	55	27	22	22	33	61	40	34	41	35	47	19	22	24	51
65.333	55	54	27	23	22	32	62	40	36	41	34	47	19	22	24	51
65.667	56	54	27	23	23	32	61	40	36	41	34	47	20	22	24	52
66	54	53	26	22	23	32	60	39	35	40	34	46	19	21	23	51
66.333	54	53	26	22	21	33	60	38	35	41	34	46	18	22	23	51
66.667	54	52	27	22	22	32	60	40	35	42	34	46	19	22	24	52
67	53	52	26	22	21	31	59	38	35	40	33	45	18	22	22	50
67.333	55	51	26	22	22	31	60	38	36	40	33	45	19	21	24	51
67.667	54	51	26	22	20	31	59	37	35	40	33	44	18	21	23	50
68	54	50	26	22	21	31	59	39	36	40	32	44	19	22	23	51
68.333	54	50	26	21	21	31	58	37	36	39	33	43	17	21	22	50
68.667	54	51	26	22	21	31	58	38	36	40	32	44	18	22	23	50
69	54	50	25	21	20	31	59	36	36	40	32	44	17	20	22	50
69.333	54	50	26	21	21	32	58	37	36	39	32	44	18	20	23	50
69.667	52	49	24	20	22	29	56	36	35	38	31	42	17	19	21	48
70	53	49	25	22	20	30	58	37	36	40	31	43	18	21	22	50
70.333	53	51	25	22	20	31	57	38	36	40	32	44	18	21	22	49
70.667	53	50	24	21	20	30	57	36	35	39	31	42	18	20	21	48
71	53	50	25	22	20	31	57	37	36	39	32	42	17	21	22	48
71.333	54	50	26	22	21	31	58	37	36	40	31	42	18	21	22	48
71.667	52	50	25	21	20	31	59	37	36	40	32	41	17	20	22	48
72	52	50	25	21	20	30	58	37	37	40	31	41	17	20	21	48
72.333	53	52	25	22	21	30	59	37	37	40	32	41	18	21	22	48
72.667	53	50	24	21	21	30	59	37	37	40	31	41	18	21	21	48
73	52	50	24	22	21	29	58	36	36	39	32	41	17	20	21	47
73.333	52	51	25	22	21	30	60	37	36	40	32	42	18	20	22	48
73.667	52	51	25	22	21	30	60	37	37	40	32	41	19	21	22	47
74	53	51	24	22	21	29	59	38	36	40	32	41	18	20	22	47
74.333	52	52	25	21	20	30	60	37	37	40	32	41	17	20	22	47
74.667	52	53	25	21	22	29	60	38	36	41	32	40	18	20	22	46
75	52	54	25	22	22	30	62	39	37	43	34	41	19	22	23	47
75.333	52	53	25	22	22	30	62	38	37	42	34	41	19	22	22	46
75.667	51	54	25	23	22	30	62	39	37	42	34	41	19	21	23	46
76	52	55	25	23	22	30	62	39	37	42	34	40	19	21	22	46
76.333	51	55	25	23	22	30	62	39	38	42	34	41	19	22	22	47
76.667	51	54	25	22	22	30	62	40	37	42	32	39	18	21	22	46
77	51	55	24	23	23	31	62	40	38	41	34	40	19	23	21	45
77.333	51	54	25	22	23	30	62	39	37	43	33	40	19	22	22	45
77.667	49	53	24	23	22	30	61	39	36	42	33	40	19	22	22	45
78	50	53	25	23	23	31	62	40	37	42	34	39	19	22	22	46
78.333	50	54	25	23	22	31	62	40	38	43	33	39	20	22	22	45
78.667	50	53	26	24	24	32	63	40	38	42	33	40	20	23	22	46
79	50	52	25	23	22	30	61	41	38	42	33	40	19	23	21	45
79.333	49	53	25	24	23	32	62	41	39	43	34	40	20	23	22	45
79.667	49	53	25	22	23	32	60	40	39	42	34	40	20	23	21	45
80	49	52	25	22	23	31	61	41	38	42	33	39	19	22	21	44
80.333	49	50	25	23	23	31	61	41	39	42	34	39	19	22	21	45
80.667	49	51	25	24	23	32	60	40	39	42	34	39	21	23	21	45
81	49	50	26	24	24	32	59	41	39	43	34	39	20	24	22	46
81.333	48	49	25	23	22	31	60	40	39	41	33	39	19	24	21	44
81.667	49	53	26	23	24	33	60	41	40	43	33	39	21	25	20	45
82	48	49	26	23	23	32	59	40	39	41	33	39	20	24	20	45
82.333	48	49	26	24	24	33	58	41	40	42	34	39	21	25	21	45
82.667	48	47	24	23	23	33	56	40	40	40	33	38	20	24	20	45
83	47	47	25	23	24	33	58	40	41	42	34	39	20	25	21	44
83.333	46	46	25	23	23	32	62	40	41	40	33	38	20	25	20	44
83.667	46	45	25	23	23	33	56	39	40	41	33	38	19	23	19	44
84	46	46	26	24	24	33	56	39	42	41	32	38	20	25	20	45
84.333	47	45	25	23	24	33	56	40	41	40	33	38	20	25	20	45
84.667	45	43	25	23	23	32	56	39	41	39	32	36	19	24	20	44
85	46	43	25	24	23	34	55	38	42	40	31	38	21	26	20	44
85.333	45	42	25	23	23	33	54	38	42	40	32	37	20	25	19	43
85.667	44	42	26	23	23	34	53	38	42	41	32	37	19	26	19	43
86	44	41	26	23	22	33	52	37	41	38	32	36	20	25	18	43
86.333	44	42	26	23	23	35	53	38	43	39	32	38	20	26	20	43
86.667	45	41	26	24	24	34	52	37	42	39	32	37	20	26	20	43
87	43	39	25	23	23	33	51	37	43	38	31	36	19	25	18	42
87.333	43	39	25	23	24	34	51	37	43	37	31	36	19	25	18	42
87.667	43	39	25	23	23	34	51	37	43	38	31	36	20	26	18	42
88	42	38	25	23	23	34	49	36	43	37	31	36	19	26	18	42
88.333	42	38	26	23	23	34	50	37	44	37	31	36	19	26	19	41
88.667	42	38	26	23	23	35	49	36	43	37	31	35	20	27	19	47
89	43	38	27	24	24	35	50	37	44	38	31	36	20	27	19	41
89.333	42	37	26	23	23	35	49	35	43	37	29	35	19	27	18	41
89.667	42	37	26	23	24	35	49	36	44	37	30	35	20	27	18	40
90	41	37	26	23	22	36	49	35	44	37	30	34	19	27	18	41
90.333	40	36	25	22	24	34	47	35	44	37	30	35	19	27	18	41
90.667	41	36	26	23	23	35	47	35	43	36	30	34	19	27	17	39
91	41	35	26	23	23	35	47	35	44	36	30	35	19	28	18	40
91.333	40	35	26	22	23	34	46	34	43	37	30	34	19	27	17	39
91.667	40	35	26	23	23	35	46	35	43	37	30	35	19	27	18	39
92	41	36	26	23	23	35	47	33	44	36	29	34	20	28	18	39
92.333	39	35	26	23	23	36	46	35	44	35	30	35	19	27	18	38
92.667	39	34	26	23	23	35	46	34	43	35	29	34	18	27	18	39
93	39	35	26	23	22	35	45	34	43	36	29	34	19	27	17	39
93.333	39	34	26	23	24	35	45	33	44	35	29	34	20	27	17	39
93.667	39	35	26	23	24	36	45	34	44	35	28	34	20	28	17	38
94	37	33	25	21	21	33	44	32	42	33	27	32	18	26	16	36
94.333	38	34	26	23	22	35	44	33	44	35	28	33	19	27	17	37
94.667	36	34	26	23	23	36	45	33	44	34	28	33	20	27	17	36
95	39	34	26	23	23	36	44	32	44	35	28	33	20	27	18	37
95.333	37	34	25	22	22	35	44	32	43	34	27	32	20	26	17	36
95.667	38	33	26	23	23	35	45	32	44	34	27	33	20	27	19	36
96	37	34	26	22	22	34	44	32	43	34	26	33	18	26	16	36
96.333	37	34	25	22	22	34	44	31	44	34	27	32	19	27	17	36
96.667	37	34	26	22	23	36	45	33	45	35	27	32	20	26	17	36
97	37	35	25	23	22	36	44	33	45	34	27	31	20	27	17	36
97.333	37	34	26	22	22	36	45	32	45	34	26	32	19	27	16	36
97.667	38	36	26	23	23	35	45	32	45	34	27	33	20	27	17	36
98	37	35	26	23	23	35	45	32	45	35	27	32	21	27	17	36
98.333	37	35	25	22	23	36	45	32	47	35	28	33	20	27	17	36
98.667	37	36	27	23	24	36	46	33	48	36	29	32	20	27	16	36
99	38	37	28	24	25	37	47	34	49	37	30	32	21	28	18	36
99.333	37	37	27	24	24	38	47	34	47	38	31	33	21	29	18	36
99.667	38	37	27	24	25	38	47	36	45	38	32	33	21	29	18	35
100	36	37	27	24	24	38	47	35	44	38	33	32	21	28	17	35
100.333	37	37	28	24	25	39	47	36	43	38	33	32	22	29	18	34
100.667	37	36	28	24	25	37	47	36	44	38	33	32	21	29	17	35
101	36	36	27	24	25	38	48	36	41	37	32	31	21	29	16	34
101.333	37	38	27	25	25	38	48	35	41	37	33	32	22	29	18	34
101.667	36	37	27	26	26	39	47	35	41	38	32	32	22	29	17	33
102	35	37	27	25	26	38	47	36	40	37	32	31	22	29	17	32
102.333	36	38	28	25	26	39	48	35	40	37	32	31	23	30	17	33
102.667	35	37	28	24	26	38	47	35	40	37	30	32	22	30	17	33
103	35	37	28	25	26	38	47	35	38	37	30	31	22	30	17	33
103.333	36	38	28	25	27	38	47	35	39	37	30	31	23	31	16	32
103.667	35	37	27	26	25	38	46	34	38	37	29	31	22	30	16	31
104	34	36	27	26	26	39	47	35	39	37	29	31	23	31	16	31
104.333	34	37	28	25	27	38	46	35	37	36	30	31	22	30	17	31
104.667	33	36	27	25	26	38	46	34	38	37	28	30	22	31	16	29
105	34	37	28	26	26	39	46	34	38	36	27	29	22	31	16	30
105.333	33	36	28	25	27	38	46	34	38	36	28	30	22	31	16	31
105.667	33	37	28	26	27	38	46	34	37	37	28	31	23	32	17	30
106	34	37	28	27	28	40	46	38	39	37	28	30	23	32	17	31
106.333	33	36	29	27	28	39	46	34	37	38	31	30	23	32	16	30
106.667	33	37	28	27	28	40	46	35	41	37	28	31	24	32	17	30
107	33	36	29	25	27	39	45	33	37	37	27	29	27	31	16	29
107.333	32	35	28	26	27	39	45	33	37	37	27	30	23	32	16	29
107.667	33	35	29	27	27	39	46	34	37	36	27	30	23	32	16	29
108	33	35	30	27	28	40	46	35	39	37	28	31	24	33	16	30
108.333	33	36	28	26	28	39	45	34	38	36	27	30	23	32	16	29
108.667	32	35	29	27	28	41	45	34	37	37	26	29	24	33	17	29
109	31	33	28	26	28	39	44	33	37	37	27	29	23	32	16	29
109.333	32	34	29	26	27	40	43	33	36	36	26	29	23	33	16	28
109.667	30	33	28	29	27	40	43	33	36	36	25	29	23	32	15	28
110	31	33	29	27	27	40	43	33	36	36	26	29	23	32	15	29
110.333	31	34	30	26	28	41	44	33	36	36	26	29	23	33	16	28
110.667	30	33	29	27	28	40	43	33	36	37	26	29	24	34	16	28
111	30	32	29	27	28	40	42	33	36	36	26	29	23	33	16	27
111.333	30	33	29	27	28	40	42	31	35	36	26	29	24	33	15	28
111.667	30	34	29	27	29	41	43	32	36	36	26	30	24	33	16	28
112	30	31	29	26	28	41	42	32	35	36	26	28	23	33	15	27
112.333	30	30	29	27	28	40	41	31	34	36	26	28	23	33	15	27
112.667	30	32	29	27	28	41	41	32	35	36	26	29	23	34	15	27
113	29	31	29	26	28	41	40	31	34	35	25	28	23	33	15	26
113.333	29	30	29	26	27	40	41	31	34	35	25	28	23	33	15	26
113.667	29	31	30	28	28	42	41	32	35	36	26	29	24	34	16	27
114	29	31	30	27	28	42	40	32	34	36	26	28	23	32	14	27
114.333	28	31	30	27	28	43	40	31	34	35	26	29	23	33	15	27
114.667	28	30	30	26	28	41	40	31	33	36	25	29	23	33	16	27
115	28	29	29	26	28	41	39	31	34	35	25	28	22	34	14	26
115.333	28	29	30	25	28	39	38	31	33	35	25	27	26	32	14	25
115.667	28	30	30	26	28	40	40	31	34	35	25	29	23	33	16	26
116	28	30	30	26	28	42	39	31	34	35	25	29	23	33	16	27
116.333	27	29	29	26	27	41	39	30	33	35	25	28	23	33	15	26
116.667	27	29	30	26	27	41	39	30	34	34	25	28	22	33	15	26
117	27	28	29	25	27	40	37	29	33	35	24	28	22	32	14	25
117.333	26	28	29	25	26	40	37	30	34	33	25	28	21	32	14	25
117.667	27	29	30	26	27	41	39	30	33	35	25	28	22	33	15	25
118	26	28	29	24	26	40	37	30	33	34	24	28	21	31	14	25
118.333	26	29	29	25	27	41	38	30	34	35	25	27	22	31	15	25
118.667	26	28	29	25	27	40	37	30	32	34	24	28	21	32	14	25
119	26	28	29	25	26	40	38	30	33	34	24	27	21	32	37	25
119.333	24	27	28	24	26	40	37	29	32	33	26	28	21	38	13	25
119.667	25	27	28	24	26	40	38	29	31	33	25	28	21	31	14	24
120

## Sheet: Figure 1 D (GYEC+PEAS LP)
Time	TaFRQLUC
0	176	119	240	128	80	121	118	68	267	171	140	89	131	108	84	215
0.333	164	172	227	210	82	170	118	103	261	215	166	115	134	130	106	241
0.667	171	142	232	208	78	146	110	89	243	193	153	99	121	130	86	234
1	161	97	215	130	73	106	103	63	225	164	126	77	110	110	75	198
1.333	142	79	197	103	66	91	97	55	208	144	110	66	101	92	68	167
1.667	136	71	186	94	62	83	93	51	197	132	103	61	97	83	66	146
2	130	67	176	88	57	78	88	48	187	125	95	58	93	78	61	132
2.333	124	63	169	83	53	75	85	47	176	119	94	55	90	74	60	123
2.667	121	59	161	77	49	69	90	45	168	112	85	52	87	70	58	115
3	117	55	154	74	47	65	80	43	161	105	81	50	85	68	56	107
3.333	112	52	148	71	45	62	77	42	154	100	77	47	84	65	53	101
3.667	109	48	141	66	42	58	74	39	148	95	84	44	81	62	51	95
4	105	46	135	61	40	55	72	39	142	90	70	42	78	60	50	89
4.333	100	43	129	59	38	51	68	36	135	85	65	39	76	57	47	84
4.667	96	41	125	57	37	49	67	35	130	81	63	39	74	54	46	81
5	92	39	118	54	35	47	65	32	125	76	58	36	71	53	43	76
5.333	90	38	115	52	34	45	63	32	120	74	56	35	70	51	42	73
5.667	86	36	109	49	33	42	61	31	116	71	54	34	68	49	41	69
6	82	35	105	47	31	41	59	30	110	67	51	31	64	47	39	66
6.333	78	32	101	45	30	39	57	28	106	64	48	30	63	46	37	62
6.667	76	32	97	43	29	37	55	27	103	61	47	29	61	44	37	60
7	73	30	93	42	28	35	54	26	99	59	44	28	59	42	35	59
7.333	70	29	91	40	27	33	53	24	95	57	43	26	56	42	34	57
7.667	68	29	88	39	28	33	52	24	93	55	41	26	56	41	34	56
8	65	27	85	38	26	32	50	23	89	53	39	24	54	39	32	54
8.333	64	26	82	36	25	31	49	22	86	52	38	23	52	38	31	53
8.667	62	25	80	35	25	30	47	21	83	49	37	22	50	38	30	51
9	59	25	77	34	24	28	46	20	80	48	35	20	49	36	29	51
9.333	57	24	75	33	23	28	44	19	79	46	34	20	47	36	28	50
9.667	57	24	75	34	24	27	44	19	77	47	35	20	46	35	28	50
10	54	23	71	32	23	27	43	19	74	46	34	18	45	35	26	54
10.333	54	22	72	32	23	27	43	18	73	45	33	19	45	35	26	49
10.667	52	22	69	31	22	26	41	17	70	44	32	18	43	35	25	48
11	51	22	69	33	23	27	42	17	70	44	32	17	42	34	26	49
11.333	50	22	67	32	22	26	42	17	68	42	30	17	63	34	25	49
11.667	49	22	66	31	22	27	41	16	67	43	31	17	40	35	25	49
12	47	21	66	32	22	25	40	16	66	42	32	16	39	35	24	49
12.333	48	22	65	31	22	25	40	16	65	42	31	16	39	35	24	48
12.667	46	20	64	31	21	25	39	15	63	42	30	15	37	35	23	49
13	46	21	64	32	21	26	40	15	64	43	30	14	38	35	23	50
13.333	46	22	65	32	22	26	40	16	63	43	32	15	37	36	24	50
13.667	45	21	63	32	21	26	40	15	63	42	31	14	37	35	23	50
14	46	21	63	33	22	27	39	15	62	43	31	14	37	36	23	51
14.333	44	21	63	32	21	27	39	14	62	43	31	14	36	36	22	51
14.667	44	21	63	32	21	26	39	15	64	43	31	13	36	36	22	51
15	44	21	63	32	22	26	40	14	62	45	31	13	36	36	23	52
15.333	44	21	63	34	23	28	41	15	63	44	32	14	36	38	23	52
15.667	43	21	64	34	23	28	41	15	63	46	32	14	36	38	23	54
16	44	22	64	34	23	28	41	14	62	45	32	13	36	38	23	53
16.333	44	22	65	35	23	28	41	15	63	45	33	13	37	38	23	54
16.667	44	22	65	35	23	29	40	15	64	46	33	14	38	39	23	54
17	45	22	67	35	24	30	42	16	65	47	33	14	37	40	23	55
17.333	44	22	67	36	23	29	41	15	65	47	33	13	37	39	22	54
17.667	44	22	67	36	24	30	42	15	65	47	33	14	38	40	23	55
18	44	22	68	39	24	30	42	16	66	47	34	14	38	40	22	55
18.333	44	22	67	36	24	30	42	15	66	47	34	14	38	41	22	55
18.667	45	22	67	36	25	31	43	15	67	48	35	14	38	40	22	56
19	44	22	67	36	25	30	43	15	67	48	33	14	38	41	22	56
19.333	44	22	68	36	26	30	44	16	68	48	34	14	38	41	22	56
19.667	44	21	68	37	25	31	44	15	66	48	33	13	37	41	22	55
20	44	22	68	36	25	31	45	16	68	48	34	14	39	41	23	56
20.333	44	22	69	36	26	30	44	15	68	48	34	13	38	40	22	55
20.667	44	21	69	37	26	30	44	16	69	49	35	14	39	41	22	56
21	44	23	69	36	26	30	44	15	69	47	33	13	38	40	21	54
21.333	44	21	70	36	26	30	46	15	69	48	33	13	38	40	22	55
21.667	44	21	69	36	26	30	46	15	70	48	33	13	38	40	22	55
22	44	21	69	37	26	30	45	16	70	48	34	14	39	40	23	55
22.333	44	21	69	36	27	30	46	15	71	47	33	13	39	40	21	54
22.667	45	21	69	36	28	30	55	15	71	47	34	13	39	40	21	54
23	44	21	69	35	27	30	47	15	72	47	33	13	39	40	21	54
23.333	44	21	69	35	27	30	47	16	71	46	33	13	38	40	21	55
23.667	44	20	68	35	27	29	46	15	72	46	33	13	38	40	21	54
24	44	20	68	35	27	29	46	15	73	46	33	14	38	40	21	53
24.333	44	20	68	35	28	30	47	16	74	45	32	13	38	40	20	54
24.667	44	20	67	34	28	30	48	15	74	45	32	13	38	39	21	52
25	42	20	66	35	27	28	46	14	73	43	31	13	37	38	20	52
25.333	43	20	67	34	28	29	46	15	73	43	31	12	37	39	20	52
25.667	42	20	66	34	27	28	47	15	73	43	31	13	37	38	19	52
26	42	20	65	34	28	29	47	15	74	51	31	13	37	39	20	51
26.333	42	19	67	33	28	28	46	15	73	42	30	13	36	39	19	50
26.667	41	19	64	33	27	27	46	15	73	41	30	12	36	36	19	50
27	46	19	64	32	27	27	45	14	73	41	29	12	35	37	19	49
27.333	41	19	64	34	28	28	46	15	75	40	30	13	36	38	20	51
27.667	41	18	63	32	27	26	46	14	74	40	29	12	34	37	18	49
28	41	18	64	33	28	27	46	15	75	40	29	12	35	38	19	50
28.333	40	18	62	32	28	26	45	14	74	40	28	12	35	37	18	48
28.667	39	17	61	31	27	26	44	13	74	37	27	11	33	35	17	48
29	40	18	61	32	28	27	45	14	76	38	29	12	34	36	18	48
29.333	39	17	60	30	28	26	44	13	74	37	28	12	33	36	17	47
29.667	39	18	60	31	28	25	44	14	75	37	28	12	33	36	17	48
30	38	17	60	31	28	25	44	14	75	36	28	11	33	36	17	47
30.333	38	17	59	31	28	25	43	13	75	36	27	12	34	35	17	47
30.667	39	17	58	31	28	25	44	14	75	37	28	12	33	36	17	47
31	38	17	57	30	28	26	43	14	75	36	27	12	33	36	17	47
31.333	37	17	57	31	28	25	43	13	74	35	27	12	34	35	17	46
31.667	37	17	58	32	28	25	43	13	74	35	27	12	33	36	16	46
32	37	17	57	30	28	25	43	14	75	34	26	12	33	35	17	46
32.333	37	17	56	31	28	25	44	14	76	35	27	12	34	36	17	46
32.667	35	16	55	30	28	24	42	13	75	33	26	11	32	34	16	45
33	36	18	55	30	29	24	43	13	76	34	27	11	33	35	17	46
33.333	35	16	55	30	28	23	41	13	74	33	26	11	32	34	16	44
33.667	35	17	54	30	28	24	42	13	75	33	26	11	32	35	16	45
34	34	16	53	29	27	24	41	13	74	31	25	11	31	35	16	44
34.333	34	16	53	30	28	23	40	13	74	31	25	11	32	34	15	44
34.667	33	16	53	29	27	24	40	13	74	31	25	10	32	34	16	44
35	34	16	53	29	28	23	41	12	74	30	25	10	31	34	16	42
35.333	33	16	52	29	29	24	41	13	75	31	25	11	31	34	16	43
35.667	33	17	53	28	28	23	40	13	73	30	25	10	31	34	15	44
36	33	17	51	28	28	22	40	13	74	29	25	11	31	33	15	43
36.333	33	17	51	28	28	22	40	13	74	29	25	11	31	35	15	43
36.667	33	17	52	28	28	23	41	13	74	29	25	11	30	34	15	43
37	33	16	52	28	28	23	40	12	73	29	25	10	30	34	15	43
37.333	32	16	52	28	28	23	40	12	74	29	24	11	30	34	15	43
37.6667	32	17	50	28	28	23	39	13	75	28	25	11	31	33	15	43
38	31	17	51	28	28	22	40	12	74	28	23	10	30	33	15	42
38.3333	31	16	51	27	28	21	39	12	73	27	23	10	29	33	14	42
38.6667	30	15	50	27	28	22	39	11	74	27	23	10	29	33	14	42
39	31	17	51	27	29	22	40	13	75	28	24	11	30	34	15	43
39.3333	30	16	50	27	28	21	39	12	74	26	23	10	28	32	14	42
39.6667	30	17	51	27	29	21	40	12	75	27	23	11	29	32	15	43
40	29	16	50	27	29	21	38	12	74	26	23	10	28	32	14	42
40.3333	28	16	50	26	29	20	39	11	75	26	22	10	28	32	14	42
40.6667	29	16	51	27	29	21	39	12	75	26	23	10	29	32	14	43
41	28	16	51	25	28	20	39	11	75	47	22	9	28	31	14	41
41.3333	28	16	51	26	28	21	39	12	74	24	22	11	28	31	14	42
41.6667	28	15	51	25	28	21	39	12	74	24	22	10	28	31	14	42
42	28	15	50	25	28	21	39	12	75	24	21	10	28	31	14	42
42.3333	28	16	51	25	29	20	39	12	75	24	22	10	28	31	14	43
42.6667	28	15	50	26	29	20	39	11	76	23	22	10	29	32	13	41
43	27	15	49	24	28	19	38	11	74	23	20	10	28	31	13	42
43.3333	28	16	50	25	29	20	40	12	76	23	22	11	30	31	14	43
43.6667	27	15	50	24	29	19	39	11	75	22	21	10	29	30	13	42
44	27	16	50	24	30	20	40	11	75	23	21	10	31	31	14	43
44.3333	26	15	50	24	29	19	40	11	74	22	20	10	30	30	13	42
44.6667	25	15	49	23	28	18	38	11	74	21	19	10	30	29	13	41
45	26	15	49	23	29	18	39	11	74	22	20	9	30	29	13	41
45.3333	25	14	49	23	29	19	39	11	74	21	20	10	30	29	13	42
45.6667	26	15	50	23	29	19	39	12	75	21	20	10	31	30	13	43
46	25	14	49	23	29	18	39	11	74	21	19	10	30	29	13	41
46.3333	24	15	50	22	29	18	39	11	74	20	19	10	30	28	13	42
46.6667	25	14	49	23	29	18	39	11	73	20	19	10	30	29	13	42
47	25	14	48	22	29	18	39	12	73	20	19	10	29	28	13	42
47.3333	25	14	49	22	30	18	39	11	73	20	18	10	29	28	13	42
47.6667	24	14	49	22	29	17	39	11	72	19	18	9	29	27	12	42
48	10	-2,*	46	7	35	2	31	-6,*	62,*	-1,*	0,*	-10,*	14,*	11,*	-7,*	31
48.3333	52	27	86	40	65	32	73	20	145	31	28	14	53	41	19	67
48.6667	64	29	101	48	74	39	87	23	179	37	34	17	64	46	23	84
49	72	31	110	49	79	41	91	25	193	39	35	20	67	47	23	89
49.3333	75	30	111	47	79	40	92	25	195	38	35	19	68	47	24	90
49.6667	78	30	112	47	77	40	92	26	191	38	36	20	68	48	25	93
50	82	30	114	47	78	40	92	28	190	40	37	22	69	49	26	94
50.3333	81	30	112	47	75	40	90	28	186	38	36	21	66	48	26	95
50.6667	82	30	112	47	74	40	90	29	185	38	37	22	67	48	25	97
51	83	30	109	48	73	39	88	29	181	38	37	22	67	48	25	98
51.3333	83	31	109	48	72	40	87	31	179	38	37	23	65	48	26	101
51.6667	82	30	108	47	70	39	86	30	175	39	36	23	66	48	26	102
52	81	30	108	46	68	39	84	30	173	37	35	21	64	46	25	102
52.3333	80	29	106	46	67	38	84	30	170	37	34	21	62	45	24	103
52.6667	78	29	104	47	65	38	83	30	170	36	34	21	63	45	24	104
53	76	28	104	47	64	37	83	30	168	36	34	21	62	43	24	104
53.3333	75	28	102	46	63	37	82	31	166	36	33	21	61	44	23	107
53.6667	73	28	100	45	61	35	80	30	165	34	32	20	61	42	23	105
54	72	27	99	44	61	37	79	31	163	33	32	20	60	41	23	106
54.3333	70	26	98	43	59	35	78	30	160	32	32	20	59	40	22	104
54.6667	69	27	96	43	59	35	77	30	159	33	32	20	58	39	23	103
55	67	26	95	42	57	34	75	29	157	31	31	20	58	38	21	103
55.3333	66	25	94	40	56	32	74	28	153	30	29	19	57	37	21	103
55.6667	64	24	91	40	54	32	72	29	151	29	29	18	56	36	21	102
56	63	24	88	38	52	31	70	28	148	28	28	18	55	34	21	100
56.3333	59	22	87	37	51	30	68	27	142	27	26	17	53	33	19	98
56.6667	58	21	83	35	48	28	65	26	138	25	26	16	52	31	19	96
57	55	21	81	34	48	28	64	25	133	25	25	16	51	30	18	94
57.3333	54	20	79	32	46	26	62	25	129	24	24	16	50	29	18	92
57.6667	51	19	77	31	44	25	59	23	124	23	23	15	47	28	17	90
58	50	18	75	30	44	25	58	23	119	22	22	15	46	27	16	88
58.3333	48	18	73	28	42	23	55	23	112	21	21	14	45	25	16	85
58.6667	46	17	70	27	40	22	53	21	107	20	20	14	68	24	14	82
59	44	17	68	26	39	22	52	21	103	20	19	13	42	24	15	81
59.3333	43	16	65	25	37	21	49	21	98	19	19	13	41	23	14	78
59.6667	40	15	62	24	36	20	48	20	94	17	18	12	39	22	14	75
60	39	14	61	23	34	19	46	19	89	16	17	11	36	21	13	73
60.3333	38	14	59	22	34	18	44	18	86	17	18	11	36	20	13	71
60.6667	37	16	57	21	33	17	43	18	81	16	16	11	34	19	13	68
61	36	13	55	20	32	17	42	18	78	16	16	11	34	19	12	67
61.3333	35	13	54	20	31	16	41	17	75	15	15	11	33	19	12	65
61.6667	33	12	52	19	30	15	40	16	70	14	14	10	32	17	11	64
62	32	12	50	18	28	14	38	15	66	13	13	9	30	17	11	61
62.3333	31	11	49	17	28	15	37	15	65	13	14	9	29	17	10	59
62.6667	30	10	48	16	27	13	36	14	62	12	12	8	28	16	10	58
63	29	10	47	16	27	13	36	14	60	12	12	9	28	16	9	57
63.3333	29	11	47	16	27	13	35	14	58	12	12	9	27	16	10	56
63.6667	29	10	46	15	26	13	35	14	57	12	12	8	27	15	10	55
64	27	9	44	14	25	12	34	13	54	11	11	7	26	14	9	54
64.3333	27	10	44	14	25	13	34	13	52	12	12	8	26	14	10	53
64.6667	26	9	43	14	25	12	33	12	51	11	10	7	25	13	8	52
65	25	8	42	13	24	11	33	11	48	10	10	7	25	13	8	50
65.3333	26	9	43	14	24	11	32	12	48	11	10	7	25	14	8	51
65.6667	25	9	43	14	25	11	32	12	47	11	10	7	24	14	9	51
66	26	9	43	14	24	11	32	12	47	10	11	8	25	14	9	49
66.3333	25	9	42	13	23	11	32	11	44	10	10	7	24	13	8	49
66.6667	25	8	41	13	24	11	32	11	44	10	9	7	23	13	8	48
67	25	8	43	13	24	12	32	11	45	11	10	7	24	14	9	48
67.3333	25	9	42	13	24	12	32	12	44	11	10	7	24	14	9	49
67.6667	24	8	42	14	24	11	32	12	43	10	10	7	24	14	8	48
68	24	8	42	13	24	11	32	11	43	10	10	7	23	14	8	49
68.3333	24	7	42	12	23	10	32	11	42	10	10	6	23	13	8	48
68.6667	25	9	43	14	24	11	38	12	42	11	11	8	24	14	9	50
69	24	8	43	13	23	11	33	11	42	9	10	6	23	13	8	49
69.3333	25	9	43	14	25	12	34	12	42	10	11	7	24	14	9	50
69.6667	25	8	44	13	24	12	34	12	43	11	11	7	24	14	9	50
70	25	9	44	14	25	12	34	12	42	10	11	7	24	14	9	50
70.3333	25	9	44	14	25	11	35	12	42	10	12	8	24	15	9	51
70.6667	26	9	44	15	26	12	35	13	42	12	11	8	25	15	9	52
71	25	9	43	14	25	12	35	12	42	11	11	7	24	15	9	52
71.3333	25	9	45	14	87	12	35	12	41	10	11	7	24	15	9	51
71.6667	26	9	45	15	26	12	36	12	42	10	11	7	25	15	9	53
72	27	9	46	15	26	12	36	13	43	11	12	8	26	16	10	53
72.3333	26	9	47	15	26	13	36	13	42	11	12	8	25	16	9	55
72.6667	26	9	46	15	25	12	36	13	42	11	11	8	26	15	9	54
73	27	9	47	16	26	12	37	13	43	11	11	8	26	15	10	55
73.3333	28	10	48	15	27	13	37	14	43	11	12	8	26	16	11	55
73.6667	27	10	47	15	26	13	38	13	44	11	11	8	27	16	9	55
74	28	11	48	15	27	12	38	13	43	12	12	8	27	16	10	56
74.3333	28	11	51	22	28	13	39	15	44	12	13	10	28	17	11	57
74.6667	29	11	51	16	28	13	40	15	44	12	13	10	29	17	11	57
75	29	10	51	16	28	13	39	14	43	12	12	9	28	17	10	57
75.3333	29	10	52	16	29	13	41	14	45	12	12	9	29	17	11	57
75.6667	30	11	53	16	30	14	42	15	45	12	14	10	30	17	11	58
76	30	11	52	15	28	13	41	14	45	11	13	9	29	16	11	57
76.3333	31	11	54	16	30	13	42	16	46	12	14	10	31	17	12	60
76.6667	30	10	53	16	30	13	42	14	46	12	13	10	30	16	11	58
77	32	11	55	16	30	13	43	15	45	12	13	10	30	16	11	59
77.3333	31	11	55	16	31	13	44	15	46	12	13	10	31	17	11	60
77.6667	32	11	56	17	31	13	44	14	46	12	13	9	31	16	11	60
78	32	11	57	16	32	14	45	15	47	12	13	10	32	17	11	59
78.3333	33	11	58	18	33	14	46	15	47	12	14	10	32	17	11	60
78.6667	34	12	59	17	34	14	47	15	47	12	14	11	33	17	12	61
79	34	11	61	17	34	14	47	16	47	13	14	11	33	17	12	61
79.3333	34	11	60	17	35	15	47	15	47	13	13	10	33	17	11	60
79.6667	34	11	60	17	34	14	47	15	47	12	13	11	33	17	11	60
80	35	12	63	17	36	14	48	15	47	13	14	11	34	17	12	61
80.3333	35	12	63	18	38	14	49	16	47	13	14	12	35	17	13	61
80.6667	35	12	63	18	37	14	50	16	47	13	15	12	36	17	13	60
81	36	12	63	17	38	14	50	16	46	13	13	11	35	17	13	60
81.3333	35	12	64	18	38	15	50	16	45	13	15	11	35	17	13	60
81.6667	35	11	63	17	38	14	50	15	50	13	14	11	35	16	12	60
82	35	12	63	17	39	14	51	15	50	12	14	11	35	17	13	60
82.3333	35	12	64	17	40	15	51	16	49	12	14	11	35	16	13	59
82.6667	34	11	63	17	39	14	49	15	49	12	13	11	35	17	12	59
83	34	11	63	16	39	14	49	15	49	12	13	11	34	16	12	60
83.3333	34	12	64	17	41	15	50	15	48	12	14	11	36	17	13	59
83.6667	35	12	63	17	40	14	50	16	48	12	16	11	35	16	13	61
84	35	12	64	18	40	15	49	15	48	12	14	11	35	16	13	60
84.3333	33	11	63	16	39	14	48	14	46	12	13	10	34	18	11	59
84.6667	33	11	62	16	40	29	50	14	45	12	14	11	34	16	12	60
85	33	12	62	16	40	13	47	14	44	12	13	10	33	15	12	59
85.3333	33	11	63	16	39	14	48	15	44	11	13	10	33	16	12	59
85.6667	32	12	62	17	40	14	48	14	44	12	13	10	33	16	12	60
86	32	11	62	16	39	14	47	14	44	12	13	11	32	15	12	59
86.3333	32	11	62	16	38	13	46	14	42	11	13	10	31	15	11	59
86.6667	33	12	61	16	38	14	46	15	42	12	13	11	32	15	12	59
87	31	11	60	15	37	14	46	13	41	11	12	10	32	15	11	59
87.3333	31	10	60	15	37	13	44	14	40	11	12	10	31	15	12	59
87.6667	31	11	59	15	37	14	45	14	41	11	12	10	32	14	11	59
88	30	11	59	15	36	13	44	13	40	11	12	10	30	15	11	58
88.3333	31	11	59	15	37	14	44	14	39	11	12	11	30	15	12	58
88.6667	30	10	58	15	36	14	43	13	38	10	12	10	30	14	11	58
89	30	11	58	15	35	13	42	13	39	11	12	10	30	14	11	58
89.3333	29	11	57	15	35	14	42	14	38	11	12	9	29	15	11	59
89.6667	33	10	57	15	35	12	41	13	36	23	11	9	28	13	10	58
90	28	10	56	15	35	13	40	13	36	10	11	9	28	14	10	58
90.3333	28	10	56	15	34	13	39	13	37	10	11	9	28	14	10	59
90.6667	29	10	55	15	33	13	40	13	36	10	11	9	28	14	10	57
91	28	10	56	15	33	13	39	13	36	10	11	9	28	14	11	59
91.3333	28	10	56	15	35	13	39	13	37	11	11	10	28	14	11	59
91.6667	27	10	55	14	32	13	39	13	35	9	11	9	27	13	10	57
92	28	10	55	14	33	13	39	13	35	10	10	9	27	13	10	59
92.3333	28	11	55	15	33	13	39	13	36	11	11	9	28	14	10	59
92.6667	28	11	55	14	32	13	38	13	36	10	10	9	28	14	10	59
93	27	10	54	14	32	13	38	13	35	10	11	9	26	14	10	59
93.3333	27	9	53	14	32	12	38	12	35	9	10	8	26	13	10	58
93.6667	26	10	53	14	32	12	38	12	34	9	10	9	26	13	10	58
94	27	10	53	15	32	13	37	13	35	10	11	9	27	13	37	60
94.3333	27	10	53	14	31	13	37	12	34	10	10	9	27	14	9	60
94.6667	26	9	52	14	31	12	37	12	34	9	10	9	26	13	10	61
95	26	9	53	13	31	12	36	11	34	9	10	8	25	12	9	60
95.3333	25	9	51	14	30	12	36	12	33	9	9	8	25	13	9	60
95.6667	26	9	51	13	29	12	35	12	33	9	9	8	25	12	9	60
96	26	9	52	14	30	12	36	12	34	9	10	9	26	13	9	61
96.3333	26	9	51	13	30	11	35	11	33	9	9	8	24	12	8	61
96.6667	25	9	50	13	30	11	34	12	33	9	9	8	25	12	8	61
97	26	9	52	14	31	12	36	12	34	9	9	8	26	13	9	62
97.3333	26	9	52	13	30	11	35	11	34	9	9	9	26	12	8	62
97.6667	26	8	52	12	30	11	35	11	35	8	9	8	25	13	9	60
98	26	9	52	13	30	11	36	11	35	9	9	9	26	12	9	61
98.3333	26	13	53	13	30	11	35	11	35	9	9	9	26	12	9	61
98.6667	26	8	53	13	31	11	36	11	36	8	9	8	27	12	9	61
99	26	9	54	13	32	11	36	11	36	8	9	9	27	13	8	61
99.3333	28	9	55	13	32	11	37	12	37	9	9	9	27	12	10	62
99.6667	27	8	55	13	32	11	37	11	37	11	9	9	27	12	9	62
100	28	9	56	14	33	12	38	12	39	9	10	10	28	13	10	62
100.333	27	9	56	13	33	12	38	11	38	8	9	9	28	12	9	61
100.667	29	9	57	13	34	12	40	12	39	9	9	9	29	12	9	62
101	28	9	57	14	35	12	39	12	40	9	10	10	29	13	10	61
101.333	29	9	58	14	36	12	40	13	40	9	10	10	29	13	9	62
101.667	27	8	57	12	34	10	38	10	39	7	8	8	28	11	8	59
102	29	9	60	13	36	12	40	11	41	9	9	10	30	12	9	62
102.333	28	8	58	12	35	11	40	11	40	8	9	9	29	12	9	61
102.667	30	9	60	14	37	12	42	12	42	9	10	10	31	12	10	62
103	29	9	60	13	37	12	41	11	42	8	9	10	30	12	10	61
103.333	31	10	62	15	38	13	43	12	43	10	11	11	32	13	11	62
103.667	31	9	62	13	39	13	42	12	43	10	10	10	31	13	10	61
104	30	10	63	14	39	13	44	12	43	10	10	11	32	12	11	61
104.333	31	9	62	14	39	12	43	12	43	9	9	11	31	12	10	60
104.667	31	9	63	14	40	13	43	12	43	9	10	11	32	12	11	60
105	32	9	63	14	40	13	44	12	44	10	10	12	33	13	11	60
105.333	32	10	65	15	41	13	44	12	44	10	11	12	32	13	11	60
105.667	32	10	64	14	41	13	45	11	43	10	10	12	37	12	11	59
106	31	10	66	14	41	14	45	12	44	11	10	12	33	12	11	59
106.333	32	10	64	14	41	13	44	12	43	10	10	12	33	12	11	59
106.667	32	10	65	15	43	15	46	13	45	11	11	12	34	13	12	59
107	33	10	66	14	43	14	46	12	45	11	11	13	34	12	12	60
107.333	31	10	64	13	42	14	45	12	44	10	11	12	33	11	12	58
107.667	31	10	64	14	42	14	44	12	43	10	11	12	32	12	11	58
108	30	10	64	15	42	14	44	12	44	11	11	13	33	12	12	58
108.333	31	11	65	15	42	15	45	12	43	11	11	13	33	12	12	60
108.667	30	11	65	15	42	14	45	12	43	11	11	13	33	12	12	58
109	31	11	64	15	42	15	44	12	43	12	12	13	33	12	13	58
109.333	30	11	63	16	42	15	44	13	43	11	12	13	33	12	13	58
109.667	31	11	63	16	41	15	44	12	42	12	12	13	33	11	13	58
110	30	10	63	15	40	15	44	11	42	11	11	13	32	11	12	57
110.333	30	10	62	15	41	14	42	12	40	11	11	13	31	11	12	57
110.667	30	11	63	16	40	15	43	12	41	12	12	13	32	11	13	58
111	29	10	61	16	39	15	42	13	41	11	12	13	32	11	13	58
111.333	29	11	61	16	39	15	42	12	40	12	12	14	32	12	13	58
111.667	29	11	61	16	39	15	42	12	40	12	13	14	31	12	13	57
112	28	10	60	16	38	15	42	11	39	12	11	13	32	11	13	56
112.333	28	11	60	16	38	16	41	12	40	13	13	13	32	11	14	58
112.667	29	11	59	15	38	15	41	12	39	12	12	13	30	11	13	57
113	28	10	59	16	37	16	41	12	39	12	12	13	30	11	13	56
113.333	28	11	58	16	37	16	40	12	38	12	12	13	31	11	14	57
113.667	29	11	59	17	37	16	40	12	38	13	13	14	31	11	13	57
114	28	11	57	16	36	15	40	12	37	12	12	13	30	10	13	57
114.333	28	12	57	17	36	16	40	13	38	14	13	14	30	11	14	57
114.667	27	12	57	16	36	16	39	13	37	13	13	13	30	10	14	56
115	28	12	56	17	36	16	39	13	38	13	13	14	29	11	15	58
115.333	27	11	56	16	35	16	38	12	36	13	12	14	30	10	14	56
115.667	27	11	55	16	34	16	38	12	36	13	13	13	29	10	14	56
116	26	11	55	16	34	16	37	12	35	13	13	13	28	10	13	55
116.333	26	11	55	16	34	16	37	12	35	13	13	13	29	10	14	55
116.667	26	11	54	16	33	16	37	12	34	13	13	13	28	10	14	56
117	26	11	54	16	33	16	37	12	34	13	13	13	29	9	13	56
117.333	26	12	55	17	33	16	37	12	35	13	14	13	29	10	14	57
117.667	26	11	52	17	33	15	36	12	34	13	13	13	28	10	14	56
118	26	11	51	16	33	15	35	12	34	13	13	13	28	10	14	56
118.333	26	11	52	17	33	15	35	12	33	13	13	13	27	10	14	56
118.667	25	11	50	16	32	16	34	11	32	12	13	13	28	9	13	56
119	26	12	50	17	31	16	35	12	33	13	13	12	28	10	13	57
119.333	25	11	49	16	32	15	34	12	32	12	13	12	27	10	13	57
119.667	25	11	50	16	31	16	34	12	32	13	13	13	26	10	13	58
120	24	10	48	15	30	14	33	11	31	11	12	11	26	9	12	55
120.333	25	12	49	17	31	15	33	12	32	12	13	13	27	10	13	58
120.667	23	10	52	16	30	14	32	12	30	12	12	12	26	10	12	57
121	24	11	49	16	31	15	33	12	31	13	13	13	26	10	13	58
121.333	24	11	49	16	31	15	33	12	31	12	13	12	26	9	13	57
121.667	24	11	49	16	31	15	33	12	30	12	12	12	27	10	12	57
122	24	10	49	16	30	14	33	12	31	12	13	13	26	9	12	57
122.333	24	11	49	16	31	15	33	12	30	13	13	13	26	10	13	57
122.667	24	11	49	16	31	14	33	12	31	12	13	13	26	10	13	57
123	23	11	49	15	32	14	33	12	31	15	12	12	26	10	13	56
123.333	24	11	49	16	32	15	33	12	32	12	13	13	27	10	13	58
123.667	24	11	48	15	31	13	32	12	30	12	12	12	26	9	12	56
124	23	10	49	15	32	14	32	11	31	12	12	12	26	10	12	57
124.333	24	11	51	16	31	14	33	12	31	12	12	12	26	10	12	57
124.667	25	11	50	16	32	14	33	12	32	12	13	12	27	10	13	58
125	24	12	51	15	33	14	33	12	32	12	13	13	26	10	13	56
125.333	24	10	51	15	33	14	33	12	31	11	12	12	26	9	12	55
125.667	25	12	52	16	34	14	34	12	32	12	13	13	27	11	13	57
126	23	10	52	15	33	13	35	12	32	14	11	12	26	10	12	56
126.333	25	11	53	15	35	14	35	12	32	11	12	13	27	10	12	56
126.667	25	11	53	16	36	13	35	12	32	12	12	13	27	9	13	56
127	25	11	55	15	36	13	35	12	33	12	13	13	27	10	12	55
127.333	25	11	55	15	36	13	36	12	33	11	13	14	28	10	13	54
127.667	27	11	57	16	38	15	37	13	34	12	13	14	28	10	13	55
128	27	12	57	16	39	14	38	13	34	12	13	14	29	11	14	54
128.333	27	11	59	16	39	15	38	13	35	13	13	15	29	11	14	53
128.667	27	12	59	17	40	14	38	13	35	12	13	14	30	11	14	55
129	27	11	60	16	40	15	39	13	36	12	13	15	30	10	14	53
129.333	28	12	60	17	42	15	39	14	36	13	14	15	30	11	20	53
129.667	28	12	61	17	43	15	40	14	35	13	14	16	30	11	14	52
130	27	13	62	17	43	16	40	14	37	14	15	16	31	12	15	53
130.333	28	13	62	18	44	15	42	19	37	14	14	16	31	12	15	52
130.667	29	13	64	18	45	15	42	15	37	14	15	17	32	12	16	52
131	29	13	63	17	45	16	41	16	37	14	14	17	31	12	16	52
131.333	28	13	63	17	45	16	42	15	37	13	14	17	31	12	16	51
131.667	28	13	63	17	45	16	41	14	37	13	14	16	31	11	15	51
132	28	13	64	18	47	16	42	15	37	14	15	17	32	12	17	51
132.333	29	14	64	19	47	17	43	16	37	14	16	18	32	12	17	51
132.667	29	22	64	18	47	17	43	15	37	15	16	17	32	13	17	50
133	28	13	64	18	47	16	43	15	37	14	15	17	31	12	16	49
133.333	28	14	64	18	46	17	43	15	37	15	15	17	31	12	17	50
133.667	28	14	64	19	47	17	43	16	36	15	16	18	31	13	18	49
134	28	15	64	18	46	17	43	16	37	16	16	18	31	13	18	49
134.333	28	15	62	19	46	18	43	17	37	15	16	18	31	13	18	49
134.667	28	15	63	18	46	17	43	17	37	16	17	18	31	14	18	48
135	27	14	62	18	44	17	41	16	35	15	16	17	31	13	17	48
135.333	28	14	62	19	45	17	42	16	35	15	16	18	32	13	18	48
135.667	27	15	62	19	44	17	42	17	35	16	17	18	31	13	19	48
136	28	16	61	20	44	18	43	17	36	17	17	19	32	14	19	49
136.333	28	16	61	20	44	18	42	18	36	16	17	18	31	14	19	49
136.667	28	15	60	19	42	17	41	17	34	16	17	18	31	13	18	48
137	26	15	60	19	42	17	40	17	34	16	16	18	30	13	19	47
137.333	28	15	60	19	42	18	41	17	34	16	17	19	30	14	19	48
137.667	27	16	60	20	41	18	40	17	33	16	17	19	30	14	19	47
138	27	16	59	21	41	19	41	18	34	17	17	19	30	14	20	48
138.333	27	16	57	20	40	18	40	18	34	17	17	19	30	14	20	48
138.667	26	15	57	19	39	18	39	18	32	16	17	18	29	14	19	46
139	26	15	56	20	39	18	38	18	32	16	17	18	28	14	19	47
139.333	26	16	56	20	38	18	37	17	32	17	17	19	28	14	18	46
139.667	25	16	55	19	38	18	37	17	33	17	17	18	28	14	19	46
140	25	16	54	20	38	18	37	18	32	16	17	18	29	15	20	47
140.333	26	18	55	20	37	18	37	18	32	16	17	19	28	15	19	47
140.667	25	16	55	20	37	19	37	18	33	17	17	19	29	15	20	47
141	24	16	53	20	37	18	36	18	31	18	17	19	28	15	19	47
141.333	24	16	52	20	37	18	36	19	31	17	17	19	27	16	20	48
141.667	25	17	52	20	37	18	36	18	31	18	18	19	28	15	20	47
142	23	15	51	19	35	18	35	17	30	17	17	18	27	15	19	48
142.333	24	16	51	20	36	18	35	18	30	17	18	19	27	15	19	48
142.667	23	15	50	20	34	17	34	18	29	16	16	18	26	15	18	48
143	23	16	51	20	35	18	34	19	30	17	17	18	27	15	19	49
143.333	23	15	49	19	34	17	33	18	29	16	17	17	25	15	18	48
143.667	23	15	49	19	34	17	33	18	29	17	16	17	25	15	18	48
144	23	16	49	20	34	17	33	19	29	17	16	18	26	15	18	49
144.333	22	15	49	18	33	17	32	18	29	16	16	16	25	14	17	49
144.667	22	15	48	19	34	16	33	17	28	16	15	17	24	15	17	49
145	22	15	48	19	33	17	33	18	29	17	16	18	25	15	17	49
145.333	23	16	49	19	34	17	33	19	29	17	16	18	25	16	18	48
145.667	22	15	49	19	35	16	33	19	29	17	16	17	25	15	17	49
146	22	15	49	19	34	16	31	17	28	16	15	17	24	15	16	49
146.333	22	15	49	19	34	16	32	18	28	17	16	17	24	15	17	50
146.667	22	15	49	18	34	16	35	18	28	16	15	17	24	15	17	49
147	22	15	50	18	36	16	33	18	28	17	16	17	24	15	17	50
147.333	22	15	50	18	36	17	34	18	29	17	16	18	25	15	18	51
147.667	22	15	50	18	38	16	34	19	29	17	16	18	25	15	17	51
148	22	15	50	18	39	16	34	18	29	17	16	17	25	16	17	51
148.333	22	15	50	18	38	16	33	21	29	17	15	17	24	15	17	51
148.667	22	15	51	18	39	16	33	20	29	17	16	18	25	15	17	51
149	22	14	51	18	38	15	32	19	29	17	15	17	23	15	17	50
149.333	22	14	51	17	39	15	33	19	29	17	15	17	24	15	16	50
149.667	22	15	51	18	40	16	34	20	29	17	15	18	24	15	18	51
150	22	15	51	18	40	15	34	20	30	17	15	18	24	15	17	50
150.333	23	15	52	19	42	16	35	21	31	18	16	19	25	16	18	50
150.667	23	15	52	19	42	16	34	21	31	18	16	18	24	15	17	50
151	22	15	52	18	42	16	34	20	31	17	15	18	25	15	17	49
151.333	23	15	52	18	43	16	35	21	31	18	16	18	25	16	18	49
151.667	24	15	53	19	45	16	36	21	31	18	15	19	25	16	19	50
152	25	16	55	19	45	17	36	21	32	18	16	20	26	16	19	51
152.333	24	15	55	19	46	16	37	22	32	18	16	20	26	16	19	50
152.667	24	15	54	18	45	16	36	21	31	17	16	19	25	16	18	48
153	25	16	55	19	47	17	38	22	32	18	16	21	26	17	19	51
153.333	25	15	55	19	47	16	38	22	32	18	15	21	26	17	19	50
153.667	25	16	57	19	48	17	38	22	33	19	16	21	27	17	20	50
154	25	16	55	19	48	16	39	22	33	21	16	21	26	17	19	51
154.333	25	16	55	19	47	16	38	23	33	19	16	22	27	17	21	51
154.667	25	16	55	19	47	17	37	22	33	19	16	22	27	17	20	50
155	26	17	56	20	49	17	39	23	34	20	17	22	27	17	21	51
155.333	26	17	56	19	49	18	39	24	34	20	17	23	27	18	21	52
155.667	26	18	56	20	49	18	39	24	34	20	17	22	28	18	21	51
156	25	17	55	19	48	18	39	24	33	20	16	22	27	17	21	50
156.333	25	18	57	20	49	18	40	24	34	21	17	23	27	18	22	51
156.667	25	17	54	19	48	17	38	24	33	20	16	22	27	17	21	50
157	25	17	54	19	48	18	39	25	34	20	17	23	26	18	21	50
157.333	25	17	54	20	47	17	38	25	33	21	17	23	26	18	22	50
157.667	25	17	53	19	47	17	38	24	33	20	17	23	26	17	21	50
158	25	17	55	20	48	18	39	25	33	21	18	23	27	18	22	50
158.333	25	17	52	19	46	18	38	24	32	20	17	23	53	18	21	50
158.667	25	17	53	19	47	17	38	25	33	21	18	23	26	18	22	49
159	24	17	51	19	46	17	37	25	32	21	17	23	26	18	22	50
159.333	25	17	51	20	47	18	37	25	33	20	18	24	26	18	22	50
159.667	18	11	45	13	40	12	32	19	26	15	11	18	20	12	17	43
160	12	5	40	8,*	33	6,*	25	13	21	9,*	6,*	12,*	14	5,*	12	37
160.333	24	18	52	20	45	18	37	26	33	22	18	25	26	18	22	50
160.667	23	16	51	19	44	17	36	25	32	20	17	24	26	18	22	50
161	24	18	50	19	44	18	37	26	32	21	18	24	26	18	22	50
161.333	24	18	50	20	44	18	37	26	32	21	18	24	25	19	22	49
161.667	24	18	50	19	43	17	36	25	32	21	17	25	26	18	22	50
162	23	17	49	19	53	18	36	26	32	20	17	24	25	18	21	50
162.333	24	19	49	20	44	18	37	27	32	21	18	25	25	18	23	50
162.667	23	18	49	19	43	18	36	26	32	22	18	25	24	18	22	50
163	24	19	49	20	43	18	36	27	32	22	19	25	25	18	23	50
163.333	23	18	47	19	42	18	36	26	31	21	19	25	25	18	23	50
163.667	22	18	48	19	42	17	36	27	31	21	18	25	24	18	22	51
164	23	18	48	20	42	18	36	26	31	21	19	25	24	19	22	50
164.333	23	18	47	19	42	18	37	27	31	21	19	25	24	18	22	50
164.667	23	18	48	19	46	17	38	26	31	21	19	25	24	19	22	50
165	22	18	46	20	41	17	38	27	31	21	19	25	24	19	22	50
165.333	23	19	47	20	41	18	40	27	31	22	19	26	25	19	23	52
165.667	23	18	47	20	42	18	40	28	31	22	18	26	24	18	22	52
166	22	18	46	19	41	18	39	27	30	21	19	24	23	18	21	52
166.333	23	19	47	20	41	18	40	28	31	21	20	25	24	19	23	53
166.667	22	18	45	19	40	17	39	27	30	21	19	24	23	18	22	52
167	21	18	44	19	40	17	39	27	29	21	19	24	22	18	21	53
167.333	21	18	44	19	40	17	38	27	29	21	18	23	23	18	21	53
167.667	22	18	44	19	39	17	38	28	29	20	19	23	22	18	21	53

## Sheet: Figure 1. E (GYEC+PEAS 4C)
Time	TaFRQLUC
0	37	-29	-27	-5	1	-27	-15	-4	-14	-9	-13	-25	16	-13	-7	0
0.333	110	36	34	41	56	31	37	52	26	35	35	31	71	31	24	39
0.667	127	59	61	67	98	60	80	96	43	57	57	43	87	49	33	63
1	147	65	56	66	97	63	83	105	43	57	59	58	84	52	35	69
1.333	165	73	65	71	100	65	88	116	49	62	68	75	94	60	46	75
1.667	166	85	80	75	98	67	81	117	56	67	65	95	103	75	67	91
2	167	99	93	78	103	70	73	114	61	73	63	108	111	86	82	108
2.333	169	110	102	82	101	75	72	112	65	79	64	112	118	92	86	116
2.667	179	115	107	90	105	83	77	119	70	85	70	111	129	99	88	126
3	187	108	104	99	112	94	84	127	75	92	77	116	137	99	87	131
3.333	197	99	98	111	119	106	93	135	80	99	87	122	146	101	85	137
3.667	207	97	96	130	130	117	102	146	89	108	96	130	155	103	86	147
4	220	97	97	149	133	132	118	157	101	120	105	140	167	104	90	164
4.333	230	100	98	168	141	148	129	171	110	129	112	151	175	106	92	179
4.667	242	104	99	187	151	163	142	189	119	140	123	165	183	108	96	194
5	253	108	103	200	164	176	153	204	140	147	129	175	189	111	103	213
5.333	258	114	103	211	176	184	162	220	137	158	135	186	202	112	105	230
5.667	259	116	103	212	185	187	166	229	144	163	138	194	202	116	112	245
6	246	115	100	206	185	188	168	227	146	162	138	194	200	116	116	256
6.333	234	115	96	197	181	184	162	219	145	158	135	191	199	117	120	258
6.667	220	111	92	188	176	183	155	209	140	151	131	184	189	115	121	256
7	206	108	87	182	170	177	145	198	133	143	127	176	179	113	122	250
7.333	199	103	82	177	165	171	138	187	129	136	124	165	170	109	119	243
7.667	194	102	83	175	164	164	133	179	123	130	119	159	164	104	118	234
8	189	98	80	173	164	161	130	174	119	123	116	152	154	100	116	227
8.333	190	98	79	173	168	155	130	172	115	121	115	147	150	97	112	223
8.667	189	96	78	177	171	157	131	173	114	121	113	144	146	95	110	217
9	189	97	76	175	176	159	133	176	112	117	113	141	143	92	109	212
9.333	188	95	76	176	180	160	133	178	108	117	113	137	139	88	107	209
9.667	184	94	74	174	180	162	133	180	107	115	110	133	135	85	103	204
10	182	95	72	174	185	165	135	183	106	114	110	133	136	85	104	201
10.333	180	93	71	172	186	165	135	185	106	115	110	130	133	83	101	197
10.667	179	96	71	171	185	167	135	184	104	114	107	134	131	81	98	197
11	175	96	69	168	185	165	134	186	103	112	106	124	130	79	98	193
11.333	172	96	70	165	183	167	133	183	103	112	106	123	130	77	96	189
11.667	171	96	71	162	184	164	133	182	102	110	103	119	128	76	95	186
12	168	97	69	159	181	161	131	180	100	109	99	117	128	76	93	181
12.333	165	96	66	154	177	160	129	178	98	108	98	137	126	73	90	175
12.667	161	99	68	149	175	160	125	175	97	107	95	112	125	73	90	172
13	158	100	66	148	173	155	123	175	96	105	92	110	123	72	87	165
13.333	154	100	65	143	167	154	119	168	93	102	90	106	122	70	85	160
13.667	152	104	69	143	163	154	119	165	92	103	88	106	121	70	84	156
14	149	103	68	140	158	150	114	160	89	98	85	102	118	68	81	150
14.333	143	106	68	137	157	150	111	155	89	97	82	102	117	68	80	149
14.667	141	107	70	132	152	147	109	149	86	94	81	99	115	67	78	144
15	139	108	71	132	149	149	106	146	86	94	78	97	115	66	76	141
15.333	135	110	70	130	144	147	102	140	84	92	76	96	112	64	74	136
15.667	133	111	74	128	143	147	101	139	84	90	76	96	112	66	74	134
16	131	114	74	126	138	146	99	135	83	88	73	95	110	62	71	131
16.333	130	114	76	125	138	145	101	131	82	87	71	93	110	63	70	129
16.667	129	115	77	124	135	143	96	129	81	85	70	93	108	63	68	125
17	127	118	78	126	133	142	95	127	82	85	70	93	108	62	68	123
17.333	127	119	80	123	131	140	94	126	80	85	68	92	109	62	66	120
17.667	127	121	83	122	131	142	96	125	81	85	68	92	108	63	66	120
18	126	123	83	123	129	139	94	122	80	83	67	91	108	62	66	117
18.333	127	125	85	123	132	140	95	122	81	83	69	92	110	63	68	116
18.667	127	125	85	124	131	138	95	120	81	82	67	92	109	63	67	114
19	128	125	84	125	131	137	98	120	82	84	67	92	110	64	65	114
19.333	129	126	84	125	130	137	95	120	82	83	67	92	110	65	65	112
19.667	127	125	85	127	132	137	97	120	82	84	66	94	110	63	64	112
20	130	127	84	128	131	138	98	121	83	84	68	93	111	65	65	112
20.333	130	127	84	129	134	140	99	122	84	83	67	94	111	66	64	113
20.667	130	125	85	130	135	141	101	122	85	86	69	96	113	67	65	113
21	132	125	86	132	135	144	104	123	87	87	69	97	115	67	65	113
21.333	132	125	86	133	138	145	104	122	87	87	70	98	116	68	66	113
21.667	134	123	86	135	139	145	107	125	90	89	71	100	118	69	66	114
22	136	120	85	136	143	147	109	127	92	90	71	101	118	70	67	114
22.333	138	121	83	138	145	151	111	126	93	91	74	103	121	72	68	117
22.667	139	119	84	140	146	152	114	129	95	92	75	103	123	74	69	118
23	142	117	82	140	149	154	116	129	98	95	76	106	124	74	70	118
23.333	142	113	78	140	151	155	116	130	97	94	75	105	127	74	71	119
23.667	145	111	76	144	153	158	119	131	100	98	78	108	129	77	72	119
24	146	110	70	144	155	159	122	138	104	100	79	109	131	78	74	123
24.333	149	109	66	147	158	164	125	136	105	103	81	112	141	79	75	125
24.667	152	105	63	147	160	164	127	137	109	103	81	112	136	81	75	125
25	153	102	60	150	162	168	131	140	111	106	84	114	138	81	77	128
25.333	156	102	59	152	165	173	134	142	115	107	84	116	141	84	79	130
25.667	158	98	57	154	166	176	135	145	115	111	86	117	143	86	81	132
26	161	96	56	158	168	181	141	148	119	113	89	120	145	88	83	136
26.333	165	94	55	160	174	185	145	152	124	117	91	120	150	91	85	139
26.667	166	92	53	163	174	188	146	155	125	119	92	119	153	91	85	141
27	170	91	52	168	179	192	152	159	131	123	96	122	157	95	90	147
27.333	173	91	53	171	179	197	155	163	134	126	97	124	160	97	93	150
27.667	174	89	49	172	179	198	156	165	137	127	98	124	162	98	93	151
28	179	88	51	177	181	203	162	169	141	133	102	127	166	102	96	156
28.333	182	89	50	181	184	208	163	174	143	136	104	128	168	104	100	158
28.667	184	90	49	184	184	210	165	177	147	138	106	129	172	104	102	162
29	187	88	50	185	186	214	169	182	150	142	109	131	174	106	105	165
29.333	190	92	50	189	187	219	171	185	152	144	109	131	176	110	106	169
29.667	191	89	49	193	188	219	174	186	158	149	113	132	182	110	110	171
30	194	89	49	197	188	224	173	191	160	151	113	134	185	112	112	175
30.333	194	87	49	198	189	225	175	194	163	154	115	134	186	114	115	178
30.667	197	88	49	203	192	229	177	199	166	159	116	135	191	117	118	182
31	199	87	50	206	193	232	177	201	170	159	119	136	192	119	120	184
31.333	199	88	49	207	194	236	180	203	173	163	120	136	195	119	122	187
31.667	203	88	49	211	195	239	179	207	174	164	121	137	197	120	126	190
32	205	88	50	213	198	242	178	209	177	168	125	137	200	124	129	192
32.333	206	88	50	215	196	243	179	214	182	170	126	137	201	123	130	194
32.667	207	85	50	218	200	248	178	216	182	173	126	139	204	125	132	197
33	208	87	50	221	200	251	178	219	186	179	129	140	205	129	136	201
33.333	209	86	50	223	203	254	177	221	188	177	130	139	208	128	138	202
33.667	210	87	51	227	203	257	178	226	191	179	132	141	212	132	142	206
34	207	86	51	227	204	259	175	226	193	184	131	141	210	132	142	206
34.333	205	87	52	229	204	260	175	230	192	185	131	141	210	132	144	206
34.667	205	87	52	232	205	264	174	231	195	185	133	141	211	134	146	209
35	205	86	53	233	206	266	172	231	195	187	132	141	212	134	147	212
35.333	202	86	53	235	206	265	170	233	197	189	133	143	212	136	149	213
35.667	200	85	52	235	206	268	169	237	197	188	131	140	212	135	150	212
36	197	85	52	237	205	269	165	238	199	190	130	142	211	138	150	214
36.333	196	85	53	235	207	270	164	240	198	189	130	142	211	138	151	215
36.667	192	83	52	237	206	271	163	240	196	188	129	139	207	139	150	215
37	189	82	51	236	203	270	160	238	196	189	127	140	206	138	149	212
37.333	188	84	51	237	203	272	157	238	196	188	127	139	206	139	149	214
37.667	181	78	47	232	199	268	150	234	191	183	122	133	200	136	155	210
38	182	81	50	236	200	271	152	236	193	187	125	141	204	140	148	213
38.333	179	80	49	233	201	271	148	235	192	186	123	137	200	138	149	210
38.667	175	79	49	233	197	271	145	233	190	183	122	139	197	138	146	208
39	174	78	49	230	195	270	141	233	187	182	120	136	194	138	143	205
39.333	168	77	49	230	192	266	139	231	186	178	117	136	191	137	141	205
39.667	167	76	49	231	191	270	137	230	185	179	114	136	187	137	141	204
40	165	73	49	226	189	264	133	230	182	176	114	135	187	137	141	200
40.333	161	73	49	226	207	262	130	228	180	174	111	134	184	137	137	199
40.667	156	72	48	224	185	263	127	225	179	173	111	134	181	137	137	198
41	155	71	48	221	182	261	125	222	175	170	107	134	179	134	134	194
41.333	153	71	48	219	180	261	123	223	175	170	106	132	175	133	132	192
41.667	150	68	47	215	180	259	120	221	174	167	103	132	175	134	131	192
42	149	70	48	214	179	259	119	218	170	166	102	131	171	134	130	190
42.333	146	67	45	213	174	257	116	216	169	163	100	130	168	133	127	186
42.667	144	67	46	210	171	256	113	212	166	161	99	130	166	132	125	184
43	142	68	46	209	170	255	113	212	164	160	97	130	164	133	124	184
43.333	138	65	45	207	167	252	109	210	161	156	94	128	161	131	120	179
43.667	138	66	44	206	167	251	108	208	161	155	94	129	161	131	122	179
44	136	64	45	206	166	251	106	208	161	154	92	128	157	131	121	177
44.333	132	65	44	200	161	249	102	205	157	152	89	127	156	128	117	174
44.667	132	65	44	200	160	248	104	203	155	150	87	128	154	131	115	174
45	129	63	43	196	157	246	101	201	153	148	86	126	152	130	112	172
45.333	128	68	44	193	156	246	99	201	153	148	85	126	150	127	111	170
45.667	128	63	43	192	153	245	99	199	150	145	84	125	147	129	109	168
46	124	64	44	191	153	243	97	197	148	144	84	125	148	129	109	167
46.333	123	62	43	190	150	241	97	196	147	142	83	125	145	127	106	165
46.667	123	62	43	188	148	246	96	195	146	140	80	125	145	128	106	164
47	121	61	43	187	148	242	95	194	145	140	80	123	143	126	105	162
47.333	121	62	42	183	144	240	93	192	143	137	79	124	140	127	102	161
47.667	118	62	41	182	145	238	93	191	141	134	77	123	140	126	100	158
48	117	61	40	180	143	237	93	191	140	135	76	122	138	126	100	159
48.333	116	60	41	179	142	236	91	190	139	133	76	122	137	126	99	158
48.667	116	61	40	179	141	236	93	190	138	133	77	122	138	126	98	157
49	115	62	41	178	141	235	92	191	139	133	76	123	137	128	97	158
49.333	113	60	39	173	139	234	93	190	138	132	75	121	136	126	95	159
49.667	114	60	39	176	138	235	93	191	138	133	75	122	137	128	97	155
50	115	59	40	175	137	239	94	191	138	132	75	121	137	129	93	156
50.333	113	58	38	174	138	237	94	191	137	131	75	121	135	129	93	156
50.667	112	58	38	173	137	238	95	194	135	131	74	119	135	130	93	155
51	113	58	38	175	137	240	94	194	137	132	75	119	136	131	91	157
51.333	113	59	39	174	139	242	96	198	138	131	75	120	137	133	93	159
51.667	113	57	37	174	138	243	96	198	139	133	77	121	136	134	92	157
52	114	58	36	175	139	245	95	200	137	133	75	120	137	135	93	160
52.333	114	57	37	177	139	247	97	204	141	134	76	120	138	137	92	163
52.667	115	58	38	177	140	250	98	208	142	136	76	120	139	139	93	163
53	115	58	38	179	143	252	100	211	142	138	79	119	140	141	92	163
53.333	115	57	37	179	142	253	100	212	143	138	77	117	138	141	93	165
53.667	114	56	36	178	142	254	101	216	143	138	78	119	140	144	92	168
54	116	56	36	178	142	256	101	219	144	139	77	118	141	145	92	168
54.333	115	55	37	179	144	256	101	221	144	140	78	117	141	147	93	170
54.667	115	57	36	180	144	258	102	225	145	142	80	118	141	149	94	172
55	116	55	37	181	143	261	104	227	148	143	80	116	142	150	93	173
55.333	116	56	36	182	146	262	104	231	145	144	81	117	141	154	93	173
55.667	117	57	38	183	147	263	106	234	149	144	81	116	143	154	95	175
56	116	56	36	183	148	265	106	236	149	144	82	115	143	156	94	176
56.333	117	56	36	186	149	266	106	239	151	147	82	116	143	158	94	177
56.667	120	55	37	185	151	269	107	244	151	149	83	116	145	161	97	181
57	120	57	37	186	152	268	107	247	152	150	84	115	146	164	96	180
57.333	119	55	37	186	151	269	108	248	152	149	83	113	146	161	97	180
57.667	118	56	37	187	152	271	109	249	154	152	83	114	145	165	96	182
58	118	54	36	185	152	270	108	253	152	152	84	113	144	164	97	180
58.333	121	56	39	187	153	272	110	257	155	152	83	112	146	167	98	185
58.667	119	55	36	186	153	274	110	254	153	153	85	113	146	167	97	182
59	119	55	37	184	154	273	109	257	152	153	86	112	143	168	98	183
59.333	119	55	37	183	153	275	109	259	152	152	83	112	144	168	98	182
59.667	120	56	38	184	153	274	109	260	152	150	84	111	144	168	99	183
60	118	55	37	181	151	273	109	263	151	148	84	110	144	168	98	182
60.333	128	54	37	180	152	273	107	261	151	150	82	109	143	170	97	181
60.667	116	55	37	179	150	271	106	259	148	150	82	109	140	168	98	180
61	116	55	37	178	149	269	107	260	146	148	82	108	140	168	96	178
61.333	116	56	37	175	149	267	105	255	144	148	81	107	139	168	97	177
61.667	114	55	37	173	148	268	103	256	144	144	81	105	136	167	95	175
62	116	55	37	171	145	263	102	254	143	143	80	106	136	166	95	174
62.333	112	56	36	170	144	263	102	251	140	141	78	106	134	164	94	172
62.667	114	56	37	167	143	259	101	248	139	139	78	104	134	164	94	172
63	111	55	37	164	140	258	98	245	136	137	77	102	132	162	93	167
63.333	110	54	36	164	137	253	96	242	133	135	76	101	129	160	92	163
63.667	109	54	36	158	136	251	95	239	132	133	74	101	129	161	92	161
64	109	55	36	156	135	250	94	235	131	132	73	101	126	159	91	159
64.333	107	55	37	152	133	245	92	233	127	130	72	100	124	157	89	156
64.667	105	54	35	149	130	240	88	227	123	126	70	99	120	154	88	153
65	106	54	35	146	128	238	88	224	123	125	70	98	121	153	87	149
65.333	103	54	36	141	126	235	85	220	119	122	68	96	118	151	87	147
65.667	102	54	36	140	125	232	84	218	118	121	66	96	117	149	86	143
66	102	54	35	136	120	230	82	212	116	117	64	95	114	147	85	141
66.333	99	54	35	134	118	226	80	209	112	114	63	94	112	143	84	138
66.667	99	54	36	132	116	221	78	206	111	113	62	93	113	143	83	135
67	97	54	35	129	113	218	76	201	107	108	60	92	109	139	82	131
67.333	95	53	36	127	112	216	76	197	108	108	60	91	106	138	80	131
67.667	94	53	34	122	109	214	73	194	104	105	58	90	105	135	81	124
68	94	52	34	121	108	210	72	190	102	104	57	90	103	135	79	123
68.333	93	51	33	116	105	207	70	185	100	101	55	89	103	133	79	121
68.667	91	52	34	116	103	203	69	181	98	99	55	87	99	129	77	117
69	91	51	34	113	101	201	70	182	97	97	54	87	100	130	76	117
69.333	90	50	33	111	99	197	66	176	95	95	52	84	97	126	76	114
69.667	89	52	34	108	98	196	65	173	93	93	53	84	96	125	74	113
70	88	51	33	107	96	194	65	171	91	91	53	83	94	125	75	109
70.333	88	51	33	105	94	191	64	168	90	90	52	83	94	120	73	107
70.667	86	50	33	101	92	187	61	163	87	88	48	82	91	120	72	106
71	87	49	33	101	91	185	61	163	86	89	50	81	92	118	73	104
71.333	86	49	33	100	90	179	59	160	85	86	50	81	90	116	71	103
71.667	85	50	33	97	87	178	59	158	84	83	49	79	88	114	71	100
72	84	49	32	96	86	177	59	156	82	83	49	80	89	115	71	98
72.333	83	49	33	95	87	175	59	154	82	83	47	80	88	113	71	97
72.667	83	49	32	93	85	172	57	153	80	81	48	77	87	110	69	97
73	82	48	32	91	83	171	56	152	80	79	47	76	87	110	69	92
73.333	82	48	32	90	82	169	55	150	78	78	47	76	84	109	68	94
73.667	81	48	32	89	97	168	55	149	78	77	47	76	85	109	68	92
74	83	49	32	90	81	167	54	150	77	77	48	74	85	108	69	92
74.333	81	49	32	88	81	165	55	148	76	78	47	74	84	108	69	92
74.667	80	48	32	88	81	166	54	149	77	76	47	73	84	108	68	91
75	79	47	31	88	81	165	55	147	77	76	48	74	81	107	68	91
75.333	80	47	32	88	81	164	55	150	77	77	48	72	82	108	68	92
75.667	80	46	30	87	81	165	54	150	76	76	47	71	83	107	66	89
76	80	46	31	86	80	164	55	150	76	77	47	71	81	108	66	91
76.333	80	47	32	87	80	165	54	152	77	77	48	73	82	109	67	91
76.667	80	47	31	87	81	165	54	154	78	77	48	71	82	110	68	91
77	79	46	31	85	81	165	54	153	76	77	49	69	82	110	67	90
77.333	80	46	32	88	82	166	55	156	77	79	49	69	81	111	67	91
77.667	81	46	32	88	82	167	55	159	77	79	49	69	82	111	69	92
78	80	45	32	87	81	166	55	160	79	78	50	68	81	112	68	93
78.333	81	44	31	87	82	166	56	161	79	79	50	67	82	112	68	94
78.667	82	44	30	89	83	166	58	163	80	80	52	68	81	113	70	94
79	80	44	31	89	83	166	56	164	83	80	51	66	81	114	69	95
79.333	81	44	30	88	83	164	57	166	81	82	52	65	81	112	68	94
79.667	82	45	32	90	85	166	59	169	82	84	55	66	83	115	71	96
80	82	44	32	92	86	166	58	172	84	84	54	65	83	116	71	98
80.333	83	45	32	91	86	168	60	173	84	85	56	65	85	117	72	99
80.667	83	44	31	91	88	166	60	177	85	86	58	65	83	117	71	98
81	84	44	32	91	89	169	61	179	86	87	57	64	86	118	73	101
81.333	83	43	31	91	88	167	60	179	86	87	58	63	86	120	72	101
81.667	84	44	32	94	90	168	61	185	88	89	59	62	84	121	73	102
82	84	43	32	95	91	169	64	187	90	90	60	62	85	122	73	104
82.333	84	43	31	95	92	168	63	187	89	90	62	62	85	124	74	105
82.667	85	44	32	95	92	168	64	189	91	91	62	62	86	124	75	106
83	86	44	31	96	93	169	63	190	90	90	62	61	86	124	75	107
83.333	84	42	31	96	93	168	65	192	91	92	62	60	86	124	73	108
83.667	87	44	32	97	94	168	65	195	92	93	64	60	86	125	76	107
84	86	43	32	97	93	168	65	195	92	94	64	59	86	125	74	108
84.333	85	42	31	96	94	167	64	196	91	94	64	58	86	126	74	109
84.667	86	44	33	97	95	165	65	196	92	94	64	58	86	126	76	111
85	85	42	31	97	94	164	65	197	93	94	65	57	86	124	74	108
85.333	84	42	30	96	94	163	65	195	92	92	65	57	85	124	75	110
85.667	84	41	31	95	94	160	67	195	91	96	66	55	84	122	75	108
86	85	42	30	96	93	160	66	195	91	94	66	55	84	122	74	108
86.333	85	42	33	95	94	159	66	193	91	94	67	54	85	122	76	108
86.667	86	42	31	94	94	156	65	192	90	95	65	52	84	120	74	107
87	83	40	30	94	93	154	63	190	88	92	66	54	82	119	74	104
87.333	85	41	31	93	92	151	64	188	88	92	66	50	83	118	74	103
87.667	82	42	31	92	91	149	61	187	87	90	64	51	83	117	73	104
88	83	42	31	92	91	146	63	186	86	89	65	49	81	115	73	102
88.333	84	41	30	90	90	145	62	182	84	88	64	48	82	115	71	102
88.667	83	41	30	90	88	141	61	181	83	86	63	47	81	112	72	99
89	80	39	30	86	86	138	61	176	82	85	61	47	78	110	71	98
89.333	80	39	29	86	85	135	58	174	79	83	62	45	78	108	70	94
89.667	80	39	29	84	85	133	58	171	79	82	61	46	77	107	69	94
90	80	38	30	85	84	131	59	170	78	80	60	45	78	107	68	94
90.333	81	39	30	83	84	130	58	167	77	80	59	45	76	104	68	92
90.667	81	39	28	82	83	127	55	164	74	78	58	43	77	101	66	90
91	79	39	28	81	80	124	55	160	73	76	58	42	75	100	67	87
91.333	79	39	29	79	81	121	54	158	72	76	57	42	75	99	66	88
91.667	77	40	29	77	79	119	53	155	70	74	57	42	74	97	65	84
92	76	37	28	76	75	114	51	151	67	70	54	42	73	94	63	81
92.333	76	39	29	76	76	114	51	149	66	70	55	40	72	93	63	82
92.667	76	38	27	75	75	111	51	147	64	69	52	41	71	91	62	78
93	75	37	28	72	72	108	50	142	62	65	50	38	70	88	66	76
93.333	74	39	28	72	72	107	49	142	64	66	51	38	71	88	61	77
93.667	74	36	26	71	70	103	48	138	60	63	50	38	69	86	60	73
94	74	37	27	68	70	103	48	137	60	61	49	37	70	85	61	74
94.333	72	37	27	67	69	99	47	133	59	61	48	36	67	82	59	71
94.667	75	38	29	68	70	100	47	132	59	61	49	36	68	83	58	72
95	71	37	27	66	68	97	45	129	57	58	46	35	68	80	58	70
95.333	71	36	27	64	66	94	45	127	56	58	45	34	66	78	57	68
95.667	72	37	26	63	65	93	44	125	53	56	45	35	66	77	57	67
96	69	36	26	63	64	91	42	124	54	55	44	33	64	76	56	65
96.333	70	36	26	62	63	89	42	121	52	54	44	32	65	74	56	64
96.667	70	36	26	62	63	87	48	119	52	53	43	32	65	74	55	64
97	71	37	28	61	63	88	41	120	52	54	44	33	65	74	56	64
97.333	70	35	26	59	60	85	41	115	50	52	41	32	64	72	54	62
97.667	69	36	26	60	61	83	41	116	50	52	41	32	69	73	53	62
98	70	56	26	58	60	82	39	114	49	52	41	31	63	71	53	60
98.333	71	37	27	58	59	81	39	114	49	50	41	30	64	70	53	60
98.667	70	35	25	58	58	82	39	114	48	51	41	31	62	69	52	60
99	68	36	26	57	58	82	39	112	46	50	39	30	62	69	51	59
99.333	69	35	26	57	59	82	38	113	48	51	39	30	63	69	51	60
99.667	68	35	26	57	57	81	38	113	47	50	40	30	61	70	51	59
100	69	36	26	57	58	80	38	113	48	51	39	29	63	69	51	59
100.333	69	36	27	57	59	80	39	114	48	51	40	30	63	68	51	59
100.667	69	35	25	57	58	81	40	115	48	52	39	29	62	70	51	59
101	70	36	28	57	60	81	40	117	48	51	40	29	63	71	52	59
101.333	68	35	26	57	57	80	38	116	48	51	41	28	62	70	51	59
101.667	70	35	27	58	60	82	40	116	49	53	41	29	62	72	51	61
102	69	35	27	57	60	83	40	119	49	52	40	29	62	73	51	61
102.333	69	35	27	58	74	83	39	118	49	54	40	28	63	71	51	61
102.667	69	36	27	59	60	83	41	120	49	54	41	28	63	73	52	63
103	70	35	28	60	60	85	41	121	50	54	41	29	63	74	52	62
103.333	69	35	27	59	61	85	41	123	50	55	42	28	63	74	52	63
103.667	68	34	26	59	60	86	42	123	52	56	41	27	64	74	52	63
104	70	34	28	61	62	88	44	127	53	57	41	28	63	78	53	65
104.333	69	34	29	61	62	88	42	128	53	59	43	28	64	78	53	66
104.667	69	34	27	61	63	90	42	129	52	58	44	27	63	80	52	66
105	70	33	26	61	62	91	43	130	53	59	44	27	64	80	53	68
105.333	69	34	28	62	63	91	43	133	54	59	44	29	64	80	55	67
105.667	71	34	27	63	65	92	43	136	55	62	46	28	66	82	54	70
106	71	34	26	64	65	92	44	136	55	61	46	27	66	83	53	68
106.333	72	34	28	64	66	92	46	138	56	63	47	27	66	84	54	71
106.667	70	33	27	63	67	93	45	141	55	64	46	28	66	84	55	73
107	71	34	28	66	70	96	46	143	57	64	49	29	67	86	57	73
107.333	72	32	27	64	67	95	45	143	57	64	48	27	65	85	55	72
107.667	72	33	27	65	68	95	45	144	58	65	48	28	66	86	55	73
108	71	34	28	66	68	95	46	147	59	66	48	28	66	88	56	74
108.333	72	33	27	65	69	96	47	146	59	66	49	26	66	87	56	74
108.667	71	31	27	65	70	94	45	149	57	66	49	27	67	86	55	73
109	72	32	26	67	69	95	47	148	58	65	48	26	65	88	56	75
109.333	71	32	27	66	69	94	47	149	58	66	51	26	66	87	57	75
109.667	71	32	26	65	70	93	46	148	56	65	52	27	64	88	56	74
110	72	32	26	66	70	93	47	145	57	66	50	27	67	87	57	73
110.333	72	32	27	65	71	93	46	147	56	65	50	26	65	86	57	74
110.667	73	32	28	68	70	92	46	147	57	65	50	26	66	87	57	74
111	73	32	27	66	70	89	46	146	56	66	50	24	66	86	56	73
111.333	73	31	27	63	70	89	46	143	55	64	50	24	66	84	55	71
111.667	71	30	26	65	69	88	47	142	56	65	50	25	70	85	56	72
112	71	30	25	63	68	85	45	139	55	62	48	24	64	80	53	69
112.333	71	31	26	64	69	86	46	140	53	83	49	25	65	82	55	70
112.667	72	30	26	61	68	82	45	137	52	61	48	24	64	81	53	68
113	71	31	26	61	66	81	45	136	51	60	48	25	63	79	54	68
113.333	70	29	25	60	65	78	43	133	50	58	48	22	63	78	53	65
113.667	70	29	25	59	65	78	43	129	49	58	45	22	64	78	51	65
114	70	30	25	59	65	76	43	128	50	58	47	22	62	77	51	64
114.333	68	30	25	59	64	75	42	127	48	57	46	23	62	75	50	63
114.667	68	29	25	57	62	73	42	123	47	55	46	22	63	74	50	62
115	68	30	24	56	62	71	41	121	46	54	44	22	61	73	49	60
115.333	68	29	24	56	63	71	40	118	43	52	44	21	61	72	48	58
115.667	70	29	24	56	61	70	40	116	45	52	44	21	61	72	48	59
116	67	29	24	54	59	67	39	113	43	51	42	21	60	67	47	57
116.333	68	30	25	54	59	65	40	112	43	51	42	22	62	69	47	57
116.667	66	29	23	52	59	63	38	108	41	48	40	21	60	66	46	53
117	67	30	24	52	57	63	37	105	78	46	40	20	59	66	45	54
117.333	66	27	25	50	56	60	36	104	38	46	39	20	58	64	45	52
117.667	65	27	23	51	56	60	36	101	39	46	39	19	58	63	43	51
118	66	28	24	50	55	60	36	101	38	45	39	19	58	63	43	51
118.333	66	27	23	48	54	56	36	97	36	42	37	19	58	60	44	48
118.667	65	28	23	49	55	57	36	96	36	43	37	19	57	60	43	49
119	64	28	23	47	53	55	35	94	36	42	36	17	56	60	42	48
119.333	65	27	23	47	53	54	34	92	33	41	36	18	56	57	41	46
119.667	64	26	22	45	51	51	34	91	33	40	35	17	54	56	40	44

## Sheet: Figure 1 F (GYEC+PEAS 20C)
Time	TaFRQLUC
0	92	61	77	49	92	101	55	127	126	89	134	147	94	131	105	151
0.333	84	52	64	42	75	89	44	89	79	76	118	105	56	85	65	141
0.667	81	44	59	34	54	74	35	78	75	59	89	101	53	79	63	97
1	79	41	57	30	47	71	32	73	73	54	75	102	55	81	65	82
1.333	81	42	56	27	46	71	29	71	72	51	70	101	57	80	67	74
1.667	82	41	53	26	45	69	27	66	70	50	68	98	54	80	65	73
2	82	42	51	26	43	68	27	63	69	50	67	95	53	76	64	72
2.333	82	40	49	25	42	64	24	58	66	47	64	92	52	76	63	71
2.667	79	39	47	23	40	61	23	55	65	47	64	93	50	74	61	68
3	79	38	46	22	37	59	23	50	63	45	60	86	48	72	59	67
3.333	76	36	43	21	35	56	21	46	62	43	62	84	47	69	58	64
3.667	75	35	43	20	34	53	20	43	59	42	59	81	45	67	57	63
4	74	33	42	19	31	52	19	39	57	40	59	78	43	65	54	61
4.333	70	33	39	17	29	48	18	36	55	39	56	75	40	62	51	59
4.667	68	29	36	16	28	46	16	34	51	36	54	72	38	61	49	56
5	68	31	37	16	27	46	16	32	51	36	54	71	36	59	49	56
5.333	67	28	34	14	25	43	15	28	49	34	52	67	35	55	45	53
5.667	67	27	33	14	25	42	15	27	48	34	51	67	34	54	44	53
6	68	26	31	14	23	41	15	25	46	33	49	65	33	51	46	54
6.333	66	24	29	12	22	40	13	24	44	31	50	60	31	49	40	51
6.667	66	23	27	12	21	39	13	21	43	31	49	58	30	47	41	50
7	66	24	28	11	21	38	12	20	42	30	49	57	29	46	39	50
7.333	65	22	27	11	20	36	12	19	41	29	48	55	29	45	39	49
7.667	65	21	26	10	19	34	11	17	40	28	47	53	28	44	38	49
8	64	21	25	11	19	34	13	17	40	28	46	53	28	44	38	49
8.333	63	21	25	11	19	33	12	16	39	27	45	52	27	43	38	48
8.667	62	21	25	10	18	32	12	15	40	26	43	51	27	42	37	47
9	61	20	25	10	17	31	12	14	39	26	43	50	27	42	37	46
9.333	60	20	24	10	17	31	13	13	39	25	43	49	26	41	36	46
9.667	59	19	22	10	16	30	12	12	39	25	41	45	25	40	35	45
10	59	19	22	9	16	30	13	12	37	26	41	44	25	39	35	44
10.333	60	19	23	10	17	30	14	12	37	25	42	43	25	39	35	45
10.667	59	19	22	9	16	30	14	11	37	25	41	42	24	38	34	45
11	59	19	22	10	16	30	14	11	37	25	42	42	24	36	34	45
11.333	60	19	22	11	16	30	15	11	37	26	43	42	24	37	34	45
11.667	59	19	22	11	16	30	15	10	36	26	42	40	23	36	33	45
12	59	20	21	10	16	30	16	11	36	27	42	40	23	36	33	44
12.333	59	19	22	11	17	32	16	11	36	27	44	40	23	36	34	46
12.667	59	19	22	10	16	31	17	10	36	27	44	39	23	34	33	46
13	60	19	22	12	17	32	17	10	36	28	45	40	23	35	33	47
13.333	60	20	22	13	17	33	18	11	36	41	45	39	24	34	34	48
13.667	62	21	23	14	18	34	20	12	36	30	48	40	25	35	34	49
14	61	20	23	13	17	34	19	10	35	29	47	39	23	33	34	48
14.333	62	22	24	15	18	36	21	12	37	32	49	41	25	35	35	51
14.667	63	21	24	15	18	35	21	11	36	32	50	40	24	34	34	50
15	63	21	24	16	19	36	22	11	36	32	50	39	25	34	35	50
15.333	64	22	25	17	19	37	23	11	37	34	50	40	25	33	35	51
15.667	65	22	25	16	20	37	25	11	36	33	51	40	25	33	35	50
16	66	24	26	19	21	38	27	12	38	35	52	42	27	34	36	53
16.333	65	23	27	19	20	38	28	11	36	34	51	40	26	34	34	52
16.667	66	23	27	20	21	38	29	12	37	35	52	41	26	33	35	53
17	67	24	28	21	22	39	32	13	38	36	54	41	27	34	36	53
17.333	67	24	28	22	23	39	33	12	37	36	53	41	27	34	36	54
17.667	68	25	29	23	23	41	35	13	38	37	55	42	27	35	36	54
18	68	25	29	23	23	40	35	13	40	37	54	40	27	33	37	55
18.333	68	25	30	24	24	41	36	14	37	37	55	41	28	34	36	53
18.667	68	25	31	24	24	41	38	13	37	37	55	40	27	34	35	54
19	68	24	31	24	25	40	38	13	37	37	55	41	27	33	35	54
19.333	70	26	32	25	26	42	40	14	38	39	56	41	28	34	35	55
19.667	70	27	32	26	26	42	40	13	37	39	55	41	27	34	35	55
20	71	27	34	26	27	42	41	14	37	39	55	41	28	34	35	54
20.333	71	27	33	28	28	43	42	15	37	39	56	41	27	33	35	55
20.667	71	27	33	27	29	42	42	14	36	38	55	39	27	33	34	55
21	71	27	34	28	29	43	42	15	37	40	55	40	27	33	34	55
21.333	71	27	34	28	30	43	43	15	36	40	56	41	28	33	34	55
21.667	70	27	33	28	30	43	42	14	35	39	56	40	27	32	33	54
22	70	26	34	28	30	42	41	14	35	40	55	40	26	31	33	54
22.333	69	28	34	29	31	44	42	15	35	40	54	39	28	31	32	54
22.667	70	28	34	28	32	44	43	14	35	40	54	38	27	32	32	54
23	70	27	34	28	33	43	43	14	34	41	55	39	26	31	31	53
23.333	69	28	35	29	33	43	44	14	34	41	55	39	27	30	30	52
23.667	67	28	35	29	34	45	45	15	34	41	55	38	27	31	31	52
24	67	29	36	29	35	44	45	15	33	41	56	38	27	30	30	52
24.333	66	27	35	28	34	44	46	14	32	40	54	37	26	29	30	51
24.667	66	28	36	29	35	44	47	15	33	42	55	38	27	31	31	53
25	66	29	36	30	37	44	47	15	32	42	56	38	27	30	30	52
25.333	65	27	35	29	36	45	47	16	32	42	55	37	26	29	29	51
25.667	63	28	35	28	37	44	46	15	31	42	55	37	26	29	29	50
26	63	27	35	28	37	44	47	16	31	42	54	37	25	29	29	50
26.333	63	28	36	29	38	44	46	16	32	42	55	37	26	30	29	50
26.667	62	28	37	28	39	44	47	17	31	42	55	37	26	29	29	50
27	62	28	35	27	39	44	47	15	30	42	55	36	26	29	29	49
27.333	60	28	34	26	39	43	46	15	29	42	55	36	25	28	27	48
27.667	61	28	34	27	40	43	48	16	31	41	54	36	25	28	28	48
28	60	28	34	26	40	43	47	16	30	42	55	35	25	29	28	48
28.333	60	28	34	26	40	43	47	16	30	41	54	35	26	29	28	48
28.667	60	29	34	26	42	43	48	17	30	42	55	36	26	28	28	48
29	59	28	33	25	41	42	46	16	29	42	55	35	24	27	27	47
29.333	57	27	31	23	39	41	45	15	28	40	53	34	24	27	25	45
29.667	58	28	32	25	41	43	47	16	29	43	54	35	25	28	27	48
30	58	28	32	24	40	42	46	16	29	41	55	35	25	27	26	46
30.333	57	28	32	24	41	41	47	17	28	42	55	35	24	28	26	47
30.667	58	28	32	23	42	42	47	16	29	42	56	35	25	28	26	46
31	56	29	31	23	42	41	46	16	28	42	55	34	25	28	26	46
31.333	57	28	31	23	40	42	45	16	28	41	55	34	24	28	25	45
31.667	56	29	31	23	41	42	46	17	29	42	55	35	24	29	26	46
32	56	29	30	22	39	40	45	16	28	42	56	34	24	28	25	46
32.333	55	29	30	23	46	43	46	16	28	41	55	34	24	29	26	47
32.667	56	29	30	21	40	41	45	17	28	43	56	34	24	29	26	46
33	55	29	31	21	40	42	44	17	29	43	56	34	25	28	26	47
33.333	56	29	30	22	40	42	43	17	28	43	56	34	25	29	26	48
33.667	54	33	29	21	38	42	42	17	28	41	56	33	24	28	25	46
34	55	28	29	21	38	42	41	17	28	42	57	34	25	29	25	47
34.333	55	30	29	20	38	41	41	18	29	43	58	34	24	29	25	48
34.667	55	29	29	21	38	42	39	18	28	43	58	34	26	30	26	47
35	53	29	29	19	36	41	39	17	28	43	57	34	25	29	25	47
35.333	55	30	28	20	36	41	39	19	29	44	58	35	25	31	26	48
35.667	54	29	26	18	35	41	37	18	28	43	58	33	25	29	25	49
36	54	30	27	20	36	42	38	18	29	44	60	35	26	32	26	48
36.333	54	29	26	18	34	41	35	19	28	43	59	34	25	30	25	48
36.667	54	30	33	18	34	41	35	18	29	43	59	34	26	31	25	49
37	53	29	25	17	34	41	34	18	29	43	59	35	26	31	26	48
37.333	53	29	25	18	33	41	33	20	30	43	61	34	26	32	26	49
37.667	54	30	26	18	33	42	33	20	30	44	61	36	28	32	26	50
38	53	29	25	17	32	41	30	20	29	44	60	35	26	32	26	49
38.333	52	30	24	17	32	42	30	19	29	44	61	35	26	32	26	49
38.667	53	30	24	17	31	42	30	20	30	43	60	35	27	33	27	50
39	52	33	24	16	31	41	28	19	31	44	60	34	26	32	26	50
39.333	51	30	23	16	30	41	27	20	30	44	62	34	26	33	27	51
39.667	51	30	23	16	29	42	25	20	31	44	61	35	26	34	26	50
40	50	29	22	16	28	41	24	19	30	44	61	34	27	33	26	51
40.333	50	29	22	15	28	42	25	20	30	44	61	35	26	33	27	50
40.667	51	29	22	15	28	42	22	21	30	45	62	35	27	33	27	51
41	49	29	21	15	27	42	21	21	30	44	62	35	28	34	28	51
41.333	49	29	21	15	26	42	19	21	30	44	62	35	28	34	27	51
41.667	50	30	21	15	25	41	19	21	30	45	63	35	28	34	27	52
42	49	29	21	14	25	42	18	21	31	45	63	35	28	34	27	52
42.333	50	31	21	15	24	43	18	21	31	46	64	36	28	35	28	53
42.667	50	31	22	14	24	42	17	21	31	46	64	36	28	35	28	52
43	50	31	20	15	25	43	16	21	31	46	64	36	28	35	27	54
43.333	50	31	20	14	25	45	16	21	31	47	65	37	28	36	28	56
43.667	49	32	21	15	24	44	15	22	32	47	66	37	29	37	28	57
44	50	33	21	15	24	45	15	23	33	49	67	38	31	38	29	57
44.333	49	32	21	15	24	45	14	23	33	47	67	39	31	38	30	56
44.667	50	32	20	15	23	45	14	23	33	48	67	37	30	38	29	56
45	49	32	20	15	23	44	14	22	33	49	67	38	31	38	30	56
45.333	49	32	19	14	23	44	14	22	33	48	68	39	31	38	30	56
45.667	48	31	19	14	22	45	12	22	33	48	68	39	30	38	30	56
46	48	32	19	15	21	44	13	22	33	49	67	38	31	38	30	55
46.333	47	32	19	14	21	44	12	22	34	49	67	39	31	39	29	56
46.667	46	32	18	15	21	45	12	22	34	48	68	39	31	40	29	56
47	47	32	19	15	22	45	12	22	34	49	68	40	32	40	31	57
47.333	46	32	18	15	21	45	12	23	33	49	67	39	32	39	30	57
47.667	46	32	18	15	20	45	11	22	33	49	68	39	31	40	30	57
48	45	32	17	14	20	45	11	22	33	49	67	39	31	39	30	56
48.333	39	27	12	9	15	39	6	16	29	44	62	35	26	34	25	50
48.667	45	33	17	15	20	45	11	23	33	50	68	40	32	40	30	56
49	43	32	16	14	18	45	10	22	33	48	67	40	31	39	29	55
49.333	44	32	16	15	19	45	11	22	33	50	66	39	31	40	30	55
49.667	42	32	15	15	19	45	11	21	32	48	66	39	31	40	29	55
50	43	32	15	14	18	44	9	21	32	48	65	39	31	39	30	54
50.333	43	32	15	14	18	44	10	21	32	49	65	38	31	40	29	54
50.667	42	33	16	14	19	44	10	21	34	50	66	40	31	40	30	55
51	41	31	14	14	17	44	9	20	31	50	63	38	30	39	29	53
51.333	42	32	15	14	17	44	10	21	32	49	65	39	32	40	30	54
51.667	41	32	14	14	17	43	9	20	31	47	64	39	30	40	29	54
52	40	31	14	14	16	43	9	20	32	48	63	38	30	39	28	52
52.333	39	31	14	14	17	44	10	21	32	49	64	40	31	39	30	52
52.667	39	32	14	14	16	42	10	21	32	48	64	39	32	40	29	53
53	39	32	14	14	16	43	9	20	32	48	64	39	31	40	28	53
53.333	39	31	13	14	17	42	10	20	31	48	63	39	31	39	28	53
53.667	38	31	13	14	16	43	10	20	30	48	62	39	30	40	29	53
54	37	31	13	15	17	42	10	21	31	48	64	39	30	40	28	52
54.333	37	31	12	14	16	42	10	20	30	48	62	40	30	40	28	52
54.667	36	30	12	13	15	41	9	19	30	48	61	39	29	40	28	50
55	35	30	12	14	15	42	10	20	30	47	60	39	30	40	28	52
55.333	35	29	12	14	16	40	9	19	29	47	60	38	30	40	28	50
55.667	35	29	12	14	16	40	10	20	29	47	60	39	30	40	27	49
56	35	30	11	13	16	40	9	19	29	47	61	39	29	40	27	50
56.333	35	30	12	15	16	40	9	20	29	46	59	39	30	40	27	50
56.667	34	28	10	12	15	39	9	19	28	46	58	37	29	39	27	49
57	33	29	11	15	16	40	10	20	29	47	59	39	30	41	27	50
57.333	33	29	11	14	15	39	9	20	29	45	57	38	29	40	26	49
57.667	33	28	10	14	15	39	9	20	28	45	58	37	29	40	26	48
58	32	28	10	13	15	39	9	19	28	45	57	38	29	40	26	48
58.333	32	28	10	14	16	39	9	20	28	45	57	38	28	41	26	48
58.667	31	29	11	14	16	39	10	21	27	45	56	38	29	42	26	48
59	31	28	9	14	15	39	9	20	27	45	56	38	29	41	25	46
59.333	31	28	10	14	15	38	10	20	27	44	56	39	29	40	25	48
59.667	31	27	9	14	16	37	9	19	27	44	55	38	28	41	25	46
60	31	28	9	14	16	37	10	21	27	43	56	38	28	41	26	46
60.333	29	26	9	14	15	36	9	19	26	43	54	37	27	40	25	46
60.667	30	27	15	14	16	36	10	20	27	42	54	38	28	41	25	45
61	29	27	9	14	16	36	10	20	26	43	54	37	29	41	24	45
61.333	30	26	9	14	16	36	10	20	27	43	54	37	28	41	25	45
61.667	30	25	9	15	17	36	10	20	27	44	53	38	28	41	26	45
62	29	25	8	13	16	34	9	20	25	42	53	36	27	40	24	43
62.333	28	25	8	14	17	35	10	20	26	42	52	37	27	40	24	44
62.667	28	25	8	14	16	34	10	20	26	42	51	36	26	41	24	44
63	28	26	9	14	17	35	11	29	26	43	51	38	27	41	24	44
63.333	28	24	8	14	17	35	10	21	25	42	52	37	27	41	24	44
63.667	27	24	7	14	17	33	10	20	25	41	49	36	26	40	23	42
64	27	25	8	14	17	34	10	21	28	41	50	38	27	40	24	43
64.333	27	25	9	15	18	34	10	22	26	42	51	38	27	41	24	44
64.667	26	24	7	14	17	33	10	20	25	40	50	37	26	41	23	42
65	27	24	8	14	17	33	10	21	25	40	49	38	26	41	23	41
65.333	26	24	8	15	17	33	10	20	25	41	49	37	27	41	23	42
65.667	25	23	7	14	17	32	10	20	25	40	48	37	26	40	22	40
66	25	23	8	14	17	32	11	20	24	40	48	37	26	41	23	40
66.333	25	23	7	14	17	31	10	20	25	39	47	37	26	40	22	40
66.667	25	23	7	14	18	32	11	21	25	39	47	37	25	41	23	40
67	24	23	7	13	17	32	11	21	24	38	47	37	26	40	22	40
67.333	24	23	7	14	17	31	11	20	24	38	47	38	25	41	23	40
67.667	21	19	4	11	14	27	7	17	20	35	43	34	22	38	20	36
68	25	23	7	15	18	31	11	21	25	38	45	37	25	41	23	40
68.333	23	23	7	14	17	30	11	21	24	38	45	37	24	40	22	39
68.667	22	22	6	13	17	29	11	20	23	37	45	37	25	41	22	39
69	24	23	7	15	17	30	12	22	24	37	45	38	25	42	23	39
69.333	23	22	7	15	18	30	12	21	24	37	46	37	26	41	22	39
69.667	24	22	7	15	18	30	12	22	24	38	46	38	25	41	23	40
70	23	21	6	15	17	29	12	21	23	37	45	37	27	41	22	39
70.333	24	23	7	15	18	31	13	22	25	39	46	38	26	42	23	39
70.667	23	23	7	16	17	30	12	21	24	38	45	38	25	42	23	39
71	24	22	7	15	18	29	12	21	24	37	45	38	25	42	22	39
71.333	23	23	6	15	18	30	12	22	24	37	45	38	25	42	22	39
71.667	24	22	7	16	18	30	13	22	24	38	45	38	24	42	23	40
72	23	22	7	16	18	29	12	22	24	37	45	37	25	42	23	39
72.333	23	22	6	16	18	31	13	23	24	38	45	39	25	43	23	40
72.667	22	23	7	16	18	30	12	23	23	38	45	39	25	43	23	40
73	24	23	7	16	18	31	13	23	25	38	46	39	25	44	24	40
73.333	23	22	7	16	18	30	13	24	24	38	46	40	25	44	24	40
73.667	23	22	7	16	18	30	13	24	24	38	45	40	24	44	23	40
74	23	23	7	16	18	30	13	24	23	38	47	40	24	45	24	40
74.333	24	23	8	18	19	31	14	25	25	39	47	41	26	46	25	41
74.667	23	22	7	17	18	30	13	25	25	39	46	41	25	46	25	41
75	24	23	8	19	19	30	15	25	26	39	47	41	26	47	26	41
75.333	23	22	6	18	18	30	14	24	24	38	46	41	25	45	26	41
75.667	23	21	6	17	17	30	14	24	25	38	46	41	25	47	24	41
76	23	23	6	19	18	31	15	26	25	38	47	42	26	47	27	42
76.333	23	22	7	18	18	31	14	25	25	38	47	41	25	48	26	41
76.667	22	22	7	18	17	30	15	25	25	39	46	42	26	49	26	41
77	24	22	7	19	20	31	16	26	25	39	47	42	26	50	27	42
77.333	23	23	6	18	18	31	16	26	25	39	47	43	26	50	27	42
77.667	25	24	8	19	20	32	16	26	27	40	49	44	27	52	29	44
78	23	23	7	18	18	32	16	26	25	39	48	43	27	53	27	43
78.333	23	22	7	19	19	32	16	27	26	40	49	43	27	53	28	44
78.667	24	23	8	19	18	33	16	26	26	40	50	44	28	53	28	45
79	23	23	7	18	18	32	16	27	26	40	50	45	28	54	29	45
79.333	24	24	8	20	19	34	17	28	26	40	50	45	29	55	29	44
79.667	24	23	8	20	21	35	17	28	27	41	50	45	28	55	31	44
80	23	23	8	20	21	33	17	28	26	40	49	45	28	56	30	45
80.333	24	24	9	20	21	33	17	28	26	40	51	46	28	57	31	45
80.667	23	23	8	20	20	33	17	28	27	39	51	46	29	58	32	46
81	23	23	9	19	20	33	17	28	26	39	50	45	29	60	32	44
81.333	22	22	8	19	18	32	17	27	26	38	48	46	28	60	31	44
81.667	22	22	8	19	18	31	17	27	26	39	48	45	28	58	31	44
82	22	21	8	19	17	32	16	26	26	39	48	45	28	59	30	43
82.333	21	21	8	19	18	31	18	28	26	38	48	45	29	59	32	43
82.667	22	21	9	19	17	32	17	28	26	37	48	46	28	59	31	43
83	22	21	9	19	17	32	18	27	25	37	47	45	28	59	30	44
83.333	22	20	9	18	16	31	18	28	25	36	47	45	28	60	31	43
83.667	20	19	8	18	16	30	17	27	24	35	46	44	27	60	31	42
84	20	19	8	17	15	29	17	27	24	35	46	44	26	58	29	41
84.333	20	20	9	19	16	30	18	28	25	36	45	45	27	60	30	42
84.667	18	19	14	18	14	28	17	28	23	33	44	42	26	58	28	41
85	19	18	8	18	13	28	17	27	23	32	43	43	26	58	28	39
85.333	18	17	8	17	13	28	16	27	22	32	42	41	25	58	28	38
85.667	19	19	8	18	15	28	18	28	22	32	43	42	25	58	29	39
86	18	18	9	18	14	28	17	28	23	32	41	41	25	58	28	38
86.333	17	17	7	17	14	26	16	27	21	31	40	39	23	57	27	36
86.667	16	16	9	17	13	26	17	26	20	30	39	39	24	57	27	37
87	16	16	8	16	12	25	17	27	20	29	38	39	23	56	26	35
87.333	17	16	9	18	13	25	18	27	21	30	38	39	23	57	26	36
87.667	15	15	8	16	12	24	17	26	19	27	37	37	22	55	26	35
88	14	14	7	16	12	23	17	26	17	26	35	38	21	54	25	34
88.333	14	14	8	17	12	23	17	26	18	26	36	36	22	54	25	33
88.667	14	15	8	17	12	23	17	27	18	26	35	36	22	54	24	33
89	14	14	8	16	12	23	17	26	18	26	34	36	21	53	23	32
89.333	14	14	8	17	11	22	17	27	17	25	34	35	20	53	23	32
89.667	13	14	8	17	11	20	16	25	16	24	33	34	19	51	23	30
90	12	13	7	16	11	20	17	26	16	24	31	34	20	51	22	30
90.333	12	13	8	16	11	20	17	25	16	23	32	34	19	51	22	30
90.667	12	13	8	16	10	19	17	24	15	23	30	33	19	50	21	29
91	11	13	7	16	10	19	17	25	15	22	29	32	18	49	21	28
91.333	11	11	7	16	10	19	17	24	14	21	28	31	17	48	20	28
91.667	10	11	6	16	10	17	16	24	13	20	27	31	17	47	19	27
92	11	12	8	16	11	18	16	24	14	20	27	31	18	47	20	27
92.333	11	12	8	16	11	18	17	25	14	21	28	31	18	47	20	27
92.667	11	11	7	15	10	17	16	24	13	20	26	29	17	46	19	26
93	10	11	7	15	10	16	16	24	12	19	25	30	16	45	19	26
93.333	10	11	7	15	9	16	16	23	12	19	25	29	17	45	18	24
93.667	9	11	5	15	9	15	16	23	11	18	24	28	15	45	17	24
94	9	11	7	16	10	16	16	24	12	19	25	28	15	46	18	25
94.333	9	11	7	16	10	16	16	24	12	18	25	29	16	45	19	25
94.667	9	10	6	15	9	15	16	23	11	17	24	28	15	44	17	24
95	9	10	7	15	9	15	17	23	12	17	25	28	15	44	17	25
95.333	9	10	6	15	9	14	16	22	11	17	23	27	15	43	17	23
95.667	9	11	7	15	9	15	16	24	11	18	24	28	15	43	19	24
96	9	10	7	20	10	15	16	23	11	17	24	28	16	44	18	24
96.333	8	10	6	15	9	14	16	23	11	17	23	27	15	44	18	23
96.667	7	9	6	15	8	14	16	23	11	17	22	27	15	43	17	23
97	8	10	6	15	9	13	17	23	11	16	23	28	15	43	17	23
97.333	6	8	4	13	7	12	15	21	9	14	20	26	13	42	17	22
97.667	9	9	7	15	9	13	17	23	11	16	23	38	15	44	18	23
98	8	10	7	16	9	15	17	24	11	17	23	29	15	44	18	24
98.333	9	10	7	16	9	13	17	24	12	17	23	29	16	45	18	24
98.667	8	10	6	16	10	15	18	23	11	16	23	29	15	45	18	24
99	8	10	6	16	9	14	18	23	12	17	22	29	15	45	18	24
99.333	8	9	6	16	9	13	17	22	11	16	22	28	15	45	18	24
99.667	8	10	7	16	10	14	19	24	12	17	23	29	16	46	19	24
100	8	9	6	16	9	13	18	22	11	15	21	30	15	45	18	24
100.333	8	9	6	16	9	14	18	23	11	16	23	30	15	45	18	24
100.667	8	10	7	16	9	14	19	23	12	16	23	30	16	46	19	24
101	8	11	7	16	10	14	19	24	12	16	23	31	16	46	19	25
101.333	8	10	7	16	9	13	18	23	12	16	22	30	16	46	18	24
101.667	7	9	7	15	8	24	19	23	12	16	22	30	15	45	19	25
102	9	10	7	16	9	14	19	24	12	17	23	31	17	47	20	25
102.333	8	11	7	16	9	14	18	24	13	17	23	31	16	48	19	25
102.667	8	10	7	17	9	14	19	24	13	17	23	31	16	49	19	26
103	7	10	7	16	9	14	19	24	12	16	22	31	15	47	19	25
103.333	8	9	6	15	9	13	18	24	12	15	23	30	16	47	18	24
103.667	8	10	7	16	10	14	19	25	12	16	24	32	17	49	20	25
104	7	10	7	15	9	14	18	25	12	16	23	31	17	49	19	25
104.333	8	10	7	15	8	13	18	24	13	16	23	31	17	49	19	25
104.667	8	10	7	16	9	13	19	25	13	16	23	32	17	50	19	25
105	7	9	7	15	8	14	19	24	13	16	23	32	16	49	19	24
105.333	8	9	8	16	9	15	19	26	13	16	23	32	17	50	20	26
105.667	8	10	8	16	10	15	19	25	13	16	24	32	18	51	20	26
106	7	9	7	14	8	14	18	25	13	16	22	31	17	49	18	24
106.333	8	9	8	16	9	14	18	25	13	15	23	32	18	50	18	24
106.667	7	9	8	15	8	14	18	25	13	15	23	32	17	50	18	24
107	7	8	8	15	9	14	18	26	13	15	22	31	16	49	18	23
107.333	7	9	8	14	9	14	18	25	13	15	23	30	17	50	17	24
107.667	7	9	9	15	8	14	18	26	13	16	22	31	17	50	18	24
108	6	9	8	15	7	13	18	26	12	15	22	31	16	48	17	24
108.333	7	8	8	14	8	14	18	25	12	14	22	29	17	48	17	23
108.667	6	8	8	15	8	13	18	26	12	14	22	29	17	49	16	22
109	6	8	7	14	8	13	18	26	13	14	21	30	16	48	16	22
109.333	7	8	8	15	8	14	18	26	12	14	22	29	17	48	16	22
109.667	6	7	7	13	8	13	17	26	11	13	20	28	16	47	16	21
110	6	8	8	14	7	13	17	26	11	14	21	28	16	48	16	21
110.333	6	8	8	14	8	13	18	27	12	13	21	28	16	47	16	22
110.667	6	8	8	14	8	13	18	27	12	14	21	28	16	47	15	21
111	6	7	8	14	7	13	17	27	11	13	20	27	15	46	15	20
111.333	6	9	9	14	8	13	18	28	11	13	20	28	16	46	15	20
111.667	5	6	7	14	6	12	16	26	10	12	19	26	14	45	13	19
112	5	7	9	13	8	12	17	27	11	12	19	26	15	44	14	19
112.333	4	6	7	12	7	11	16	26	10	11	18	24	14	43	13	17
112.667	4	7	8	13	7	11	16	27	11	11	18	25	14	43	13	18
113	6	7	8	13	7	12	18	28	11	11	18	26	14	43	13	18
113.333	5	6	8	13	7	11	17	27	10	11	18	24	14	42	13	17
113.667	4	6	8	12	7	11	16	27	9	10	17	24	13	42	12	16
114	3	6	7	12	6	11	16	26	9	10	16	24	13	41	11	16
114.333	3	6	7	12	6	10	15	26	8	10	16	23	13	40	11	15
114.667	4	6	7	12	6	10	16	26	9	10	16	22	12	40	11	15
115	0	2	4	9	3	6	12	23	5	6	12	19	9	36	7	11
115.333	4	6	8	12	6	10	16	26	8	10	16	23	13	40	10	15
115.667	3	5	6	11	6	9	16	25	8	9	15	22	12	38	9	14
116	3	5	7	12	6	10	16	26	7	8	14	22	12	38	9	14
116.333	2	4	7	11	5	9	16	25	8	8	14	21	11	37	9	13
116.667	3	4	7	12	6	9	16	25	7	8	14	21	12	37	10	13
117	2	4	7	11	5	9	15	26	7	8	13	21	11	36	9	13
117.333	2	5	7	11	6	13	16	25	7	8	14	21	11	36	8	12
117.667	-1	1	3	7	2	5	11	21	2	3	9	16	7	31	4	8
118	3	5	7	11	6	9	15	25	7	8	13	20	11	36	9	12
118.333	3	5	7	11	6	9	15	25	6	8	13	21	11	35	9	13
118.667	2	4	7	11	6	8	15	24	6	8	13	20	10	35	8	12
119	2	4	7	10	5	9	14	24	7	8	13	20	10	34	8	12
119.333	3	5	7	11	6	8	15	25	7	7	13	20	10	35	7	11
119.667	2	4	7	11	5	8	14	24	5	7	12	19	10	34	7	12

## Sheet: Figure 1 G (GYEC+PEAS 22C)
Time	TaFRQLUC
0	257	216	207	156	161	227	137	231	282	246	222	196	297	418	317	224
0.333	237	205	211	152	167	234	148	251	299	262	250	212	306	426	323	230
0.667	238	202	213	152	174	232	147	256	299	264	257	216	307	420	325	230
1	234	191	212	147	175	229	149	254	295	252	261	205	299	409	313	227
1.333	230	185	206	144	172	220	149	250	293	240	263	193	293	399	302	225
1.667	224	181	201	140	167	213	147	246	287	233	266	185	282	387	295	221
2	224	178	196	136	163	204	146	241	281	227	272	178	277	377	291	218
2.333	217	172	187	132	159	190	147	235	274	219	276	170	270	368	281	210
2.667	216	170	182	129	157	182	141	229	271	212	279	164	262	358	273	203
3	212	165	175	125	152	175	138	222	262	205	281	155	255	349	261	197
3.333	207	160	168	121	148	165	134	217	255	194	281	149	247	341	251	189
3.667	203	158	163	118	145	160	134	214	249	188	281	141	241	332	241	183
4	198	156	156	116	142	154	129	210	244	180	281	135	234	317	232	176
4.333	222	152	152	113	139	150	129	207	237	175	280	131	226	307	222	171
4.667	192	151	148	111	137	147	128	205	232	170	278	126	220	296	215	167
5	186	149	144	110	135	144	125	202	225	166	275	121	213	287	206	162
5.333	187	148	141	108	132	139	123	199	221	160	272	116	207	282	198	158
5.667	186	146	138	107	131	137	124	198	217	156	270	112	202	275	194	155
6	184	145	135	106	130	135	122	196	213	152	268	108	197	270	187	152
6.333	183	142	132	105	129	132	120	197	210	149	269	105	194	269	184	148
6.667	181	140	128	103	125	130	120	194	205	145	266	101	188	264	176	144
7	178	138	127	102	123	128	117	191	201	141	266	99	184	259	172	140
7.333	177	138	124	101	123	128	117	189	198	138	265	98	182	253	169	138
7.667	175	135	122	100	122	125	116	186	194	135	264	95	178	249	164	136
8	173	134	121	100	119	125	116	186	191	133	264	93	176	244	159	133
8.333	171	132	120	99	120	123	113	184	188	130	262	90	172	239	157	131
8.667	168	129	120	98	117	123	113	184	183	126	259	89	168	233	153	130
9	168	130	117	97	117	122	112	180	181	126	257	88	165	229	151	127
9.333	168	129	116	97	115	123	112	178	176	124	254	87	163	225	149	127
9.667	164	128	115	96	115	123	110	175	172	123	251	84	158	219	145	125
10	163	127	115	96	114	122	109	173	168	120	247	84	156	216	143	124
10.333	162	128	116	97	114	123	109	174	169	122	245	84	156	212	142	124
10.667	161	128	113	95	113	123	109	173	163	119	241	83	152	209	141	123
11	159	129	115	96	113	124	109	173	161	119	239	83	152	209	142	123
11.333	159	129	114	95	113	125	109	173	159	120	238	81	149	206	139	123
11.667	161	128	117	95	113	125	108	173	160	118	241	82	148	203	140	122
12	161	130	116	96	115	127	111	174	159	119	241	83	161	202	142	125
12.333	162	129	117	97	116	128	110	174	157	120	241	83	147	202	142	123
12.667	162	131	118	97	116	128	110	171	156	121	243	82	147	201	142	126
13	164	129	117	97	116	130	110	172	155	122	244	82	146	198	140	127
13.333	164	129	118	97	119	131	111	174	153	122	247	84	146	198	143	127
13.667	165	130	122	97	118	132	111	175	153	121	248	84	146	200	145	128
14	165	131	123	97	122	134	112	175	154	124	250	86	146	198	146	130
14.333	166	130	122	98	122	135	113	176	152	124	250	86	145	200	146	132
14.667	167	134	126	99	125	137	115	177	153	126	250	88	147	199	150	133
15	167	134	128	99	125	137	114	176	155	128	253	87	144	197	150	135
15.333	166	135	128	99	126	139	113	175	155	127	252	89	146	196	152	136
15.667	168	137	131	99	130	142	117	179	155	131	254	90	147	195	153	140
16	169	138	130	101	131	142	117	179	155	132	257	91	146	194	155	140
16.333	169	141	136	103	132	145	119	180	157	131	255	91	147	195	156	142
16.667	171	144	137	103	135	147	119	181	159	135	257	98	148	198	160	144
17	170	144	138	104	138	149	122	182	159	136	257	94	148	197	162	148
17.333	174	145	141	106	139	151	125	182	160	139	259	97	151	200	165	150
17.667	201	147	142	104	140	151	125	181	161	140	258	96	148	196	166	150
18	175	151	144	105	142	153	127	180	162	140	258	97	149	199	167	153
18.333	176	151	146	107	146	156	127	183	163	141	257	98	151	199	169	155
18.667	177	153	148	107	148	158	129	181	163	146	258	100	152	199	172	157
19	178	154	151	108	150	159	131	183	166	146	256	102	153	199	175	159
19.333	177	153	149	105	149	158	128	181	164	144	252	98	150	195	172	156
19.667	178	156	153	107	152	160	131	181	167	148	254	101	152	198	175	163
20	181	159	157	107	156	165	133	183	168	150	254	103	155	199	179	164
20.333	183	160	158	108	156	166	135	183	168	152	254	103	154	200	181	166
20.667	184	161	158	107	159	166	137	183	169	152	252	103	155	198	182	166
21	183	163	161	109	161	169	138	182	170	155	252	106	156	201	185	169
21.333	185	164	161	110	162	170	140	182	173	156	250	105	156	200	185	169
21.667	188	167	164	108	164	173	142	183	172	158	250	107	157	201	187	170
22	188	166	165	109	165	173	142	180	171	158	248	107	159	198	188	172
22.333	188	167	165	107	166	175	141	181	171	158	246	105	157	198	186	173
22.667	190	169	167	109	168	176	144	180	173	161	248	108	159	198	191	173
23	191	169	169	109	170	177	146	180	173	160	247	108	158	198	191	174
23.333	191	170	168	109	170	178	146	178	172	162	244	107	160	198	190	174
23.667	193	171	170	110	173	181	147	179	172	164	246	107	158	198	193	175
24	193	172	170	109	173	183	149	177	170	165	244	106	160	196	193	173
24.333	194	173	173	108	173	185	148	177	171	166	243	108	159	195	193	176
24.667	197	175	173	110	178	186	149	178	172	168	243	107	163	197	194	176
25	197	175	173	109	177	187	151	177	173	168	242	108	161	196	195	177
25.333	198	175	174	110	178	188	152	177	172	171	242	110	163	196	196	177
25.667	199	178	177	110	180	189	154	177	171	169	242	108	162	194	197	177
26	200	175	176	110	180	190	154	178	173	171	240	106	161	193	197	178
26.333	205	178	179	111	182	195	155	181	174	173	243	109	163	197	200	180
26.667	204	178	180	110	182	195	155	180	174	174	243	110	162	196	201	181
27	207	179	183	110	187	196	157	181	173	177	243	110	164	196	202	184
27.333	210	178	185	111	187	200	159	183	175	179	241	110	166	196	204	184
27.667	212	178	185	112	188	201	159	185	174	181	245	112	164	195	205	184
28	212	179	188	110	191	202	161	187	177	184	246	113	166	197	211	188
28.333	216	177	189	111	193	204	159	188	176	184	242	113	165	195	210	187
28.667	215	177	189	111	197	206	160	197	179	187	243	114	167	196	211	190
29	217	178	192	111	200	208	161	192	177	187	244	114	167	196	213	189
29.333	218	176	193	110	199	209	161	195	179	189	243	114	166	195	215	192
29.667	220	176	195	110	202	212	161	196	179	191	243	116	167	197	218	192
30	220	175	196	109	206	214	162	198	183	192	243	116	166	198	218	194
30.333	223	174	199	108	207	213	162	199	183	193	243	118	167	196	220	195
30.667	221	172	199	108	209	215	161	199	185	196	241	116	167	198	221	198
31	224	173	201	109	211	218	163	204	186	195	243	118	169	199	225	199
31.333	226	172	201	107	212	217	162	203	186	198	241	118	168	198	226	202
31.667	227	171	203	107	215	221	162	205	188	199	240	119	167	200	228	204
32	227	171	204	106	216	220	163	205	187	202	239	121	168	200	229	205
32.333	228	170	206	104	216	220	162	207	189	204	238	120	167	201	231	207
32.667	228	169	208	105	220	223	161	206	190	203	239	119	168	201	234	210
33	230	166	210	104	221	225	161	211	190	205	237	122	166	201	236	210
33.333	231	165	211	103	235	224	160	211	194	205	235	123	167	201	236	211
33.667	231	165	213	103	225	228	161	212	193	207	233	124	167	202	240	213
34	230	165	214	103	225	227	159	211	196	210	234	125	169	204	244	215
34.333	231	163	216	102	228	227	159	214	196	211	233	125	168	203	243	218
34.667	233	163	217	103	228	228	159	214	196	210	231	126	166	205	244	218
35	232	160	217	102	230	227	159	215	198	211	230	126	168	206	247	220
35.333	231	159	218	101	230	229	158	214	196	213	229	125	166	208	249	221
35.667	230	159	218	100	232	229	158	215	197	212	226	125	165	208	248	221
36	227	158	218	98	232	228	157	213	200	211	224	124	164	208	247	220
36.333	228	157	219	97	230	230	156	212	199	208	219	124	165	207	249	221
36.667	227	153	217	97	230	228	157	212	199	209	219	122	163	206	247	220
37	224	153	218	98	231	228	156	211	198	208	217	122	162	208	247	220
37.333	222	152	218	97	230	227	156	209	197	207	213	123	160	208	247	220
37.667	221	149	217	95	228	225	153	207	197	205	210	122	160	209	246	219
38	219	150	217	96	228	225	152	206	196	203	207	121	159	207	247	220
38.333	217	148	215	96	224	223	152	205	194	201	204	120	157	208	245	217
38.667	215	146	213	96	223	222	150	203	191	200	201	119	156	207	244	218
39	212	144	212	95	223	223	151	201	191	201	199	118	155	208	241	218
39.333	211	143	213	94	222	220	150	198	190	197	197	117	153	205	240	214
39.667	208	143	209	94	218	218	147	197	188	196	192	115	151	206	237	215
40	207	141	208	94	218	218	146	196	188	196	190	114	151	205	235	215
40.333	205	139	205	92	215	216	144	193	186	192	187	112	150	205	234	211
40.667	201	137	204	92	211	213	144	191	184	191	184	113	148	204	233	208
41	200	136	203	91	211	212	143	188	181	189	181	112	147	205	228	207
41.333	198	135	200	92	206	212	143	188	180	187	178	111	146	202	228	205
41.667	196	135	199	92	207	211	142	186	177	185	175	108	213	203	226	206
42	193	132	198	91	201	208	140	184	175	183	173	108	144	202	224	202
42.333	191	130	196	90	201	207	138	180	174	183	170	107	142	201	222	199
42.667	191	130	196	91	201	204	138	179	172	179	167	106	141	201	223	198
43	187	130	194	90	198	200	138	177	171	178	163	104	140	200	219	195
43.333	185	126	189	89	192	199	135	175	169	174	161	103	138	197	215	193
43.667	184	127	189	89	191	198	135	172	167	175	159	102	138	196	214	192
44	179	125	188	91	191	198	134	171	166	171	156	102	137	197	211	189
44.333	179	124	186	88	188	195	131	169	163	171	154	100	136	194	209	188
44.667	177	122	184	88	186	191	131	166	161	167	152	98	135	193	207	186
45	176	122	183	88	184	190	130	165	159	167	149	98	132	193	205	184
45.333	173	121	183	89	182	188	129	165	158	167	148	98	132	192	204	183
45.667	172	119	180	88	180	186	128	163	156	163	145	96	130	191	200	181
46	170	120	178	88	177	184	126	159	154	162	141	95	129	190	199	178
46.333	167	116	178	87	175	182	125	158	151	161	139	94	128	189	198	176
46.667	166	117	175	88	174	179	123	157	151	158	137	93	127	188	196	174
47	165	116	175	87	173	180	124	155	150	159	134	92	126	186	193	175
47.333	163	115	175	87	173	178	123	153	148	157	133	94	126	188	193	173
47.667	162	114	173	86	169	175	121	153	147	156	131	93	126	187	191	172
48	160	114	171	87	168	173	121	150	147	155	130	91	122	185	189	172
48.333	160	112	170	86	167	173	119	147	144	153	128	90	124	186	187	168
48.667	160	111	170	85	166	171	118	147	144	153	126	90	121	184	186	169
49	159	112	170	86	166	172	117	146	144	151	126	90	122	185	187	168
49.333	160	112	169	86	166	171	115	144	144	153	125	90	120	183	186	168
49.667	159	110	169	86	164	169	114	143	143	150	123	89	121	185	183	166
50	160	110	169	86	164	167	115	142	143	150	123	88	119	183	186	167
50.333	156	109	168	84	162	166	113	142	143	149	121	90	118	183	183	166
50.667	159	108	166	87	163	166	113	141	142	150	121	89	118	184	183	165
51	158	109	167	86	164	168	114	141	142	150	121	90	119	182	184	166
51.333	157	109	166	86	164	165	112	140	143	149	122	90	117	185	183	163
51.667	158	108	168	87	164	165	113	140	145	151	121	90	117	185	183	166
52	158	111	169	87	166	166	112	141	145	152	122	91	119	187	184	166
52.333	159	109	168	87	167	167	113	142	146	152	123	93	116	188	185	166
52.667	161	107	168	87	166	164	112	140	146	152	120	91	116	187	185	168
53	163	109	171	88	168	166	113	142	149	154	121	94	117	191	187	171
53.333	160	109	169	88	167	166	113	140	149	153	120	94	116	188	187	170
53.667	162	108	170	87	169	166	113	142	148	154	121	93	117	191	187	172
54	163	109	172	87	170	166	112	142	152	156	122	95	116	191	189	173
54.333	163	107	171	88	170	166	112	143	151	157	120	95	116	193	189	172
54.667	164	108	172	88	170	167	112	142	153	156	122	96	116	191	188	174
55	164	106	171	88	171	164	112	142	153	158	122	95	114	193	188	174
55.333	165	107	174	89	173	166	112	143	156	161	122	97	116	195	192	176
55.667	166	107	175	90	174	168	112	145	156	163	122	96	117	196	192	179
56	165	106	174	89	176	165	110	144	158	162	124	96	116	196	194	179
56.333	165	106	173	88	176	166	111	142	159	166	124	95	114	196	196	180
56.667	167	106	177	89	178	167	113	145	161	167	125	97	118	199	199	182
57	168	104	177	90	178	167	110	143	160	170	125	97	117	199	206	183
57.333	169	105	177	90	177	169	110	146	162	175	125	98	117	200	201	186
57.667	170	108	178	90	178	169	112	146	165	174	126	99	117	201	198	186
58	168	104	179	89	178	168	111	144	165	173	126	100	116	200	199	187
58.333	170	104	179	89	178	168	109	144	164	177	125	99	118	201	200	188
58.667	168	104	179	90	180	169	110	145	167	176	125	101	117	199	200	190
59	168	104	180	89	181	168	111	145	168	178	128	101	118	203	199	188
59.333	167	103	180	90	179	167	108	145	168	179	126	101	117	201	209	189
59.667	166	101	178	89	180	167	107	144	167	179	126	99	117	199	199	189
60	165	100	178	89	178	167	107	144	167	181	124	99	119	202	200	190
60.333	165	101	178	90	177	166	107	143	167	178	125	99	118	199	199	190
60.667	163	98	175	87	175	164	106	142	166	180	121	98	116	198	199	186
61	159	93	172	84	170	161	101	138	161	175	118	94	114	194	196	186
61.333	161	98	174	87	175	164	105	141	165	178	121	98	116	196	198	187
61.667	160	97	172	88	171	162	103	138	165	176	120	96	116	196	197	185
62	157	95	209	87	169	160	101	138	161	176	118	95	115	194	197	184
62.333	155	95	169	86	168	158	100	135	160	175	117	94	115	191	195	183
62.667	156	94	169	86	167	158	99	134	158	173	116	93	116	191	194	183
63	153	93	167	87	164	156	99	132	158	172	115	92	116	190	193	182
63.333	150	91	165	85	162	155	97	132	154	172	112	100	113	189	192	179
63.667	150	92	164	85	161	153	95	130	153	170	111	91	115	187	190	176
64	147	90	163	84	158	151	96	128	151	169	110	91	114	187	190	175
64.333	145	88	160	83	157	150	93	126	147	165	109	87	114	182	187	172
64.667	144	88	159	84	154	149	92	125	146	165	108	87	112	182	186	171
65	141	87	156	83	151	146	91	124	144	162	105	86	113	179	184	169
65.333	139	87	154	82	149	144	88	121	144	159	104	85	112	178	180	167
65.667	138	86	155	82	147	144	88	120	141	159	104	83	113	175	181	165
66	136	84	151	80	142	141	85	117	138	156	100	81	110	175	177	163
66.333	134	85	150	81	142	140	85	115	137	154	101	80	111	171	177	161
66.667	133	84	147	81	140	139	86	115	135	151	99	78	111	172	173	158
67	132	83	145	80	137	136	82	111	131	150	96	77	109	166	171	156
67.333	130	82	145	79	135	135	82	111	130	148	97	78	108	168	170	153
67.667	128	81	141	78	133	132	81	108	128	146	93	75	107	164	168	150
68	127	80	139	77	131	131	79	107	127	144	91	74	105	163	165	148
68.333	126	80	139	79	130	130	79	104	125	143	91	72	108	163	165	146
68.667	122	78	137	77	125	128	77	103	121	140	89	71	105	159	161	143
69	121	77	135	76	124	126	76	100	119	137	85	70	103	156	158	141
69.333	119	77	134	76	124	125	74	100	118	137	87	67	104	155	157	140
69.667	119	76	131	75	120	123	75	98	117	135	85	68	103	154	157	141
70	118	75	131	76	119	121	73	97	117	133	83	66	103	152	153	137
70.333	115	73	127	74	115	117	70	94	112	128	82	64	100	150	150	133
70.667	114	74	127	73	116	117	70	93	111	127	80	63	101	148	150	132
71	112	72	125	73	114	117	69	92	110	127	80	63	99	146	148	131
71.333	112	73	123	74	112	116	69	91	107	125	79	62	99	148	147	130
71.667	111	72	124	72	111	114	67	91	108	125	78	61	99	144	145	128
72	112	73	121	74	110	113	67	89	105	122	76	60	97	144	143	127
72.333	109	71	120	72	108	113	67	88	104	123	76	59	97	143	142	125
72.667	108	72	120	72	107	112	66	87	103	122	76	60	98	143	140	124
73	108	71	119	74	106	110	65	86	102	120	74	59	97	140	138	122
73.333	107	70	118	73	105	109	64	86	102	119	73	58	95	141	138	121
73.667	108	71	118	72	104	110	64	85	101	119	74	57	95	140	138	122
74	107	70	116	72	103	109	63	84	100	119	74	57	95	139	138	120
74.333	106	70	115	72	104	109	64	84	100	116	75	57	94	150	136	119
74.667	106	69	116	71	102	108	64	84	99	117	73	56	95	140	135	119
75	106	68	114	71	102	106	63	82	99	116	73	56	93	139	135	118
75.333	105	69	114	72	102	109	64	84	100	116	74	56	95	139	133	118
75.667	106	69	115	72	103	108	62	83	100	116	74	57	96	140	134	118
76	105	68	114	71	101	106	61	82	99	116	73	55	94	138	132	118
76.333	106	68	115	72	102	107	62	82	100	115	75	57	94	138	135	119
76.667	105	68	115	72	101	107	60	83	100	115	73	54	97	140	134	119
77	106	68	115	73	103	107	61	84	101	116	76	56	95	140	134	118
77.333	106	68	116	73	106	108	61	83	102	116	74	56	95	142	135	119
77.667	106	68	114	71	102	106	60	84	102	117	75	55	96	140	136	118
78	106	68	114	72	102	108	60	84	101	118	75	56	94	141	135	119
78.333	107	68	116	72	104	108	61	83	103	118	75	55	95	141	134	121
78.667	107	68	116	71	104	109	61	85	103	120	76	56	95	141	134	119
79	106	68	115	72	103	109	60	85	104	121	76	57	95	142	137	121
79.333	108	67	116	71	106	111	62	85	105	122	76	58	95	142	137	122
79.667	109	67	115	71	105	111	62	87	106	123	77	58	96	144	138	126
80	107	67	118	72	105	111	63	86	106	123	77	59	95	144	138	123
80.333	110	67	117	72	106	111	63	87	107	125	77	58	97	144	140	125
80.667	109	66	117	70	106	111	63	86	107	125	77	58	97	144	139	122
81	109	67	116	71	107	113	63	86	108	127	78	58	97	146	139	124
81.333	111	69	119	73	108	113	64	89	110	129	81	60	99	147	143	126
81.667	110	67	119	70	107	113	64	88	112	130	80	60	98	148	143	127
82	110	66	121	72	110	115	65	90	113	132	80	60	100	148	145	130
82.333	111	67	119	73	110	114	66	90	113	132	81	61	99	148	144	129
82.667	111	66	120	71	111	117	67	91	114	133	81	62	99	149	146	129
83	111	67	121	72	111	117	67	91	116	133	81	62	100	150	148	130
83.333	112	65	119	71	110	116	66	91	115	134	82	62	101	149	148	131
83.667	110	67	118	71	111	116	66	92	116	136	81	62	100	148	150	130
84	111	65	120	71	113	117	68	91	118	137	81	62	102	149	149	132
84.333	110	65	119	69	111	118	67	91	117	135	81	62	100	149	148	131
84.667	109	66	121	70	112	119	68	91	117	136	81	63	102	149	149	131
85	109	65	119	70	113	118	69	90	118	137	81	64	101	147	149	130
85.333	108	65	118	68	111	117	68	91	117	134	80	63	100	145	149	132
85.667	107	62	117	69	110	117	68	90	116	135	78	62	101	147	148	131
86	108	64	117	68	110	116	69	89	116	135	77	64	101	146	149	128
86.333	105	63	117	69	109	117	69	90	114	136	78	62	101	145	147	128
86.667	106	63	118	68	109	116	69	90	113	137	77	62	102	146	147	130
87	104	63	115	67	107	115	67	88	111	134	75	60	100	143	147	127
87.333	104	62	113	68	105	113	68	88	112	133	75	60	101	143	146	125
87.667	101	62	113	67	105	114	68	87	109	132	73	60	100	141	146	125
88	100	61	112	67	103	112	70	86	108	131	72	61	102	139	145	123
88.333	101	62	113	66	103	111	69	84	107	129	72	59	102	139	143	123
88.667	99	60	111	65	100	108	69	83	106	127	70	58	100	136	141	120
89	97	59	110	65	99	108	69	82	103	127	69	57	98	135	140	118
89.333	97	59	110	65	98	107	68	82	102	126	68	58	98	134	139	117
89.667	95	59	107	63	97	106	67	80	98	123	68	56	98	133	138	114
90	95	59	107	65	96	106	69	79	99	122	65	57	99	129	137	114
90.333	93	59	106	64	96	105	68	78	97	122	65	55	98	130	135	113
90.667	92	58	103	63	91	102	67	76	96	119	63	55	97	128	134	111
91	90	57	103	63	91	102	66	76	93	118	61	54	96	126	132	108
91.333	89	58	104	62	90	100	67	74	92	117	60	54	96	125	131	106
91.667	89	57	101	61	88	98	67	73	90	114	59	53	95	122	131	106
92	87	57	100	61	87	99	65	72	88	111	58	52	95	121	130	105
92.333	86	54	98	61	84	96	64	72	85	110	56	49	92	119	126	101
92.667	85	54	97	59	83	96	65	70	85	109	55	50	93	118	124	102
93	84	55	98	60	82	94	65	68	83	106	54	49	92	119	124	99
93.333	82	54	98	59	82	94	64	67	82	106	54	50	91	115	121	96
93.667	81	54	93	58	79	92	63	66	79	102	51	46	90	113	119	95
94	81	53	95	59	80	91	62	66	79	101	52	47	91	111	120	95
94.333	78	51	94	57	78	90	62	65	76	100	50	46	89	109	117	92
94.667	79	53	93	58	76	88	62	63	74	98	49	45	91	109	115	90
95	78	53	92	57	76	87	62	61	74	97	49	44	88	107	115	89
95.333	77	52	90	57	74	86	60	60	73	95	47	44	88	106	114	87
95.667	76	52	90	57	73	84	59	60	71	94	46	44	88	106	112	85
96	74	51	89	57	72	84	60	59	69	92	47	42	86	103	110	86
96.333	76	51	90	56	71	83	60	60	69	91	46	43	87	103	109	84
96.667	73	50	88	56	71	83	60	58	66	90	44	42	87	104	108	82
97	73	50	88	56	68	81	57	57	67	87	44	41	86	102	106	82
97.333	71	48	87	54	66	79	57	55	64	85	41	39	85	99	106	80
97.667	73	51	87	56	68	81	59	57	65	88	43	42	86	101	106	81
98	72	50	86	56	66	79	59	57	65	86	42	41	85	100	104	80
98.333	72	49	86	56	67	79	58	54	64	85	42	40	85	99	104	79
98.667	70	48	86	55	66	79	58	54	63	85	41	40	84	98	102	78
99	71	48	87	55	65	79	58	54	63	83	41	40	84	97	102	78
99.333	72	49	86	56	65	78	57	54	62	84	41	39	84	100	101	78
99.667	71	49	87	55	65	78	58	54	63	83	41	38	84	96	102	77
100	71	49	87	56	65	78	59	54	63	83	42	38	84	98	100	76
100.333	72	49	88	55	65	79	58	54	62	83	41	40	83	98	102	77
100.667	71	48	87	56	64	78	59	55	63	83	41	39	83	98	100	76
101	71	50	88	60	65	78	61	55	64	83	41	39	84	99	102	77
101.333	71	49	87	55	65	78	60	54	63	83	42	39	83	98	101	73
101.667	71	48	87	56	64	77	59	54	63	83	42	39	84	98	100	76
102	71	48	89	56	66	79	62	55	63	83	43	38	84	101	101	76
102.333	72	49	89	56	66	79	62	54	64	83	43	40	84	99	102	77
102.667	72	50	88	55	66	79	63	55	63	82	43	38	84	100	103	77
103	73	50	90	56	67	80	63	56	65	84	50	40	85	101	102	78
103.333	72	49	90	55	66	81	64	56	66	83	44	40	83	102	103	76
103.667	73	48	90	56	67	81	64	56	66	86	44	40	85	103	104	77
104	73	49	90	56	67	82	65	58	67	88	45	41	86	103	105	77
104.333	72	48	90	55	67	81	64	57	67	87	44	40	85	103	104	77
104.667	73	72	91	55	67	83	66	58	68	88	46	40	85	104	105	79
105	74	48	92	65	68	84	66	58	68	89	46	41	85	104	106	78
105.333	72	48	92	55	68	84	67	58	69	89	45	41	85	104	106	78
105.667	74	49	98	55	68	84	67	59	70	91	47	41	86	106	109	80
106	75	48	95	56	69	84	69	59	71	91	46	42	87	106	109	79
106.333	75	49	95	55	70	86	68	59	71	92	46	41	87	106	108	80
106.667	76	49	95	55	71	87	68	60	72	94	48	43	88	107	113	82
107	77	49	94	56	71	87	69	60	73	95	48	43	90	107	111	82
107.333	77	49	96	56	71	88	71	62	75	95	49	44	91	108	112	81
107.667	76	49	96	55	70	88	71	62	75	96	49	43	90	108	114	82
108	76	48	97	54	71	89	70	61	74	96	48	43	88	107	112	82
108.333	77	49	98	56	71	90	71	62	75	97	48	43	90	110	116	83
108.667	76	49	98	55	72	89	72	63	75	98	49	44	91	110	113	83
109	77	47	99	54	71	89	70	62	74	98	49	44	90	108	115	83
109.333	76	48	98	55	72	91	71	62	75	97	48	44	92	108	116	83
109.667	76	48	98	55	71	88	71	62	74	98	48	43	90	108	116	83
110	75	48	97	55	69	91	71	61	73	97	49	43	92	108	116	82
110.333	75	48	97	54	70	90	72	60	73	98	48	45	91	107	118	83
110.667	75	48	96	55	70	91	72	62	73	100	47	44	91	107	116	82
111	74	47	98	54	70	92	70	61	72	99	47	43	92	105	115	82
111.333	74	48	95	54	68	90	70	60	70	97	47	44	92	105	117	83
111.667	73	46	95	53	68	89	69	59	70	97	45	43	91	103	113	81
112	74	48	96	54	67	89	69	61	69	96	46	43	92	105	114	82
112.333	73	47	94	53	67	87	68	59	69	94	44	43	93	102	115	80
112.667	71	46	94	53	66	88	70	58	67	95	45	42	93	102	113	79
113	71	47	93	52	65	87	67	57	67	94	43	43	91	100	110	78
113.333	69	46	92	52	64	87	66	56	65	93	43	42	92	98	110	78
113.667	69	47	92	52	63	86	66	56	64	92	46	41	92	100	111	78
114	67	46	90	52	64	85	65	55	62	91	40	40	91	96	109	76
114.333	67	45	88	51	61	83	65	54	62	89	39	40	90	95	108	74
114.667	66	45	89	51	61	82	64	53	61	88	39	40	91	94	109	75
115	66	45	88	52	59	81	62	51	59	87	38	40	89	93	105	73
115.333	64	44	86	50	58	80	61	50	57	86	37	38	89	91	104	73
115.667	64	44	87	51	58	80	62	49	57	85	37	38	91	91	102	74
116	62	44	85	50	57	78	60	48	55	83	35	37	88	88	103	71
116.333	61	43	83	49	56	76	58	48	54	82	34	37	87	86	101	71
116.667	61	43	83	49	55	78	58	48	51	80	34	36	87	86	98	70
117	60	44	81	49	54	76	58	47	51	80	34	35	87	85	97	69
117.333	61	44	83	49	53	76	59	45	51	78	34	36	87	84	96	68
117.667	59	42	80	48	52	74	57	44	49	77	32	35	86	83	96	67
118	57	41	80	49	52	73	55	43	48	76	30	35	85	80	92	67
118.333	57	42	80	48	51	73	55	43	47	74	31	33	87	81	94	65
118.667	56	42	78	48	50	71	53	42	46	73	28	32	85	79	92	65
119	57	41	78	49	50	71	54	41	46	74	30	33	86	78	93	65
119.333	55	42	77	48	50	70	54	41	45	73	29	32	85	78	90	62
119.667	54	42	76	47	48	68	52	39	43	72	29	32	83	75	89	62

## Sheet: Figure 1 H (GYEC+PEAS 28C)
Time	TaFRQLUC
0	342	405	605	321	362	508	279	620	300	491	965	342	326	173	1920	398
0.333	494	713	622	316	395	625	300	696	302	526	1006	347	337	192	1867	387
0.667	358	575	624	290	347	501	277	621	245	439	875	310	306	180	1707	355
1	297	409	588	274	313	420	243	538	226	389	780	283	279	159	1579	328
1.333	273	359	560	260	298	383	226	498	215	371	723	262	258	144	1472	308
1.667	256	326	540	249	287	359	211	471	204	356	674	245	242	131	1379	290
2	241	299	517	238	276	339	200	451	197	345	629	230	227	122	1288	271
2.333	227	276	495	229	266	322	191	430	187	333	595	219	216	116	1201	255
2.667	213	256	471	218	254	302	180	411	176	321	553	203	201	109	1117	241
3	199	237	452	206	239	288	169	395	165	307	518	188	189	103	1042	225
3.333	186	225	426	194	226	271	160	378	152	296	482	176	177	96	970	209
3.667	173	210	407	182	212	256	150	361	143	282	448	163	166	92	907	196
4	162	199	385	172	202	243	142	346	133	270	419	154	156	88	848	184
4.333	153	190	370	162	189	232	136	335	124	261	395	144	146	84	794	172
4.667	144	180	351	153	177	221	128	323	115	252	369	134	137	80	745	160
5	133	171	335	145	169	210	120	313	108	243	348	125	128	76	702	150
5.333	126	162	319	136	158	198	113	300	101	233	327	116	119	72	660	140
5.667	120	156	304	128	150	189	108	294	94	227	310	110	112	69	626	134
6	111	147	290	122	141	180	100	283	86	219	292	103	105	67	594	124
6.333	105	142	276	113	132	173	96	275	81	211	276	93	97	63	567	118
6.667	99	134	261	107	125	166	89	265	75	204	261	87	92	58	538	109
7	93	130	251	102	119	158	86	258	71	198	247	82	85	56	518	103
7.333	90	123	240	96	114	154	81	248	66	192	237	77	81	53	496	97
7.667	86	118	227	91	108	148	77	241	62	187	227	72	76	49	480	92
8	82	116	217	87	104	142	73	235	58	181	219	67	71	47	465	87
8.333	77	110	207	81	98	138	69	227	54	175	209	64	68	45	452	82
8.667	77	108	201	79	96	135	66	222	51	171	204	60	65	43	441	77
9	72	104	191	75	92	131	63	214	49	164	196	56	61	40	432	75
9.333	71	101	187	73	89	130	61	210	47	162	192	54	59	38	426	71
9.667	69	98	180	70	86	125	57	204	44	157	188	51	57	38	418	69
10	67	96	173	68	82	121	56	199	42	153	183	48	53	35	411	66
10.333	67	94	171	67	83	120	54	196	41	151	180	47	53	35	408	67
10.667	65	91	166	65	79	116	51	189	39	146	178	44	50	32	405	60
11	66	89	165	63	78	114	50	187	38	143	173	43	49	31	402	59
11.333	63	88	165	63	77	114	49	183	37	140	173	41	48	31	400	57
11.667	65	88	163	61	77	114	48	178	36	137	171	40	48	31	398	55
12	63	86	161	60	75	111	46	176	35	134	169	38	46	29	393	53
12.333	64	85	162	60	75	111	45	173	34	132	167	39	46	28	395	53
12.667	62	84	161	59	74	110	43	168	34	129	166	37	44	27	393	52
13	62	84	163	59	73	108	43	166	34	128	165	37	44	27	392	50
13.333	63	83	165	58	73	108	43	165	33	125	165	36	44	27	391	50
13.667	63	84	166	59	73	108	42	164	32	124	165	37	44	31	390	50
14	64	84	168	60	74	108	41	161	33	122	164	36	44	27	389	48
14.333	65	84	169	60	73	109	42	172	32	119	163	36	45	27	387	49
14.667	66	84	172	60	73	109	41	160	32	118	163	35	44	28	386	49
15	65	85	175	60	74	109	40	159	32	117	162	35	44	26	383	47
15.333	66	85	178	59	73	109	39	157	32	115	160	35	44	27	379	47
15.667	66	83	179	61	73	109	39	156	33	114	158	36	45	26	381	47
16	69	86	182	61	75	110	39	156	33	113	162	35	46	28	380	47
16.333	67	86	185	61	74	109	38	155	32	111	159	35	44	26	378	49
16.667	70	88	190	62	75	111	39	158	34	112	160	36	45	28	376	46
17	70	88	193	63	75	113	39	156	33	110	158	36	46	32	371	45
17.333	72	90	196	64	74	114	39	156	34	111	157	35	46	27	370	46
17.667	72	91	199	63	76	115	39	157	34	110	156	35	45	28	369	45
18	73	94	201	65	76	117	40	157	35	110	155	37	47	29	366	46
18.333	75	94	206	66	75	117	40	158	35	109	155	36	46	29	359	46
18.667	73	94	206	63	75	118	38	158	35	106	152	36	46	28	358	46
19	76	95	209	65	76	119	39	157	36	107	151	36	47	29	353	46
19.333	76	95	210	65	75	119	40	160	37	108	150	36	47	29	349	46
19.667	76	95	213	65	75	120	38	158	35	104	147	37	47	30	344	46
20	74	94	214	65	75	122	38	157	37	104	144	36	47	29	342	45
20.333	77	96	216	65	76	120	38	158	36	104	142	37	47	29	337	46
20.667	77	95	218	66	75	123	39	160	37	103	141	37	47	29	333	46
21	79	96	220	67	76	123	40	160	38	103	140	38	47	30	329	46
21.333	78	95	221	66	74	124	38	158	37	101	138	37	47	29	321	46
21.667	79	95	220	65	74	123	38	158	36	99	135	38	48	28	317	45
22	80	95	220	65	75	123	38	157	38	99	133	38	48	29	315	45
22.333	80	94	223	67	74	124	39	155	39	99	130	38	47	29	307	46
22.667	80	96	221	66	75	125	37	155	38	96	128	36	47	29	301	45
23	80	98	223	67	73	124	38	155	38	95	127	37	47	29	298	45
23.333	81	96	226	67	74	123	38	154	39	96	126	38	48	30	295	45
23.667	81	97	227	66	74	123	38	151	38	95	124	38	48	29	288	45
24	81	95	228	68	74	125	39	150	40	93	123	39	48	30	285	46
24.333	81	98	229	67	75	124	39	149	40	93	121	38	47	30	277	45
24.667	82	97	231	68	74	124	38	147	41	92	119	39	49	31	274	46
25	82	99	233	68	75	124	40	146	42	91	118	40	48	32	269	46
25.333	82	100	231	68	75	125	39	142	42	91	116	40	48	32	266	46
25.667	86	99	232	68	73	124	38	140	44	89	114	39	48	30	259	45
26	81	99	231	68	74	123	37	137	41	87	111	38	47	30	254	44
26.333	81	100	232	75	75	123	38	137	43	87	111	39	48	32	250	45
26.667	82	100	230	69	75	123	39	133	44	88	110	39	49	32	247	46
27	81	98	226	67	72	121	38	131	42	85	107	38	47	32	240	45
27.333	82	99	227	69	74	121	39	130	44	85	107	40	48	33	236	45
27.667	80	98	222	67	72	120	37	126	44	81	105	38	47	31	229	45
28	79	99	222	67	74	120	37	124	43	80	103	39	48	33	226	44
28.333	79	97	221	67	73	118	37	122	43	79	101	38	47	33	221	44
28.667	78	97	217	67	73	118	38	119	42	77	98	39	47	34	217	43
29	77	95	216	67	73	116	38	115	44	76	98	38	47	34	212	44
29.333	76	95	214	66	72	115	37	113	44	74	96	39	47	35	209	43
29.667	75	96	210	66	71	113	37	111	44	74	94	38	46	35	206	42
30	77	97	210	66	71	114	38	108	44	74	94	38	47	37	203	43
30.333	75	95	207	65	69	112	36	105	43	71	94	37	46	37	198	42
30.667	75	94	204	65	70	112	37	104	44	70	92	38	46	36	194	42
31	74	95	202	63	69	110	37	102	43	69	91	37	44	37	191	41
31.333	73	96	200	63	68	110	37	98	43	68	90	38	45	38	188	41
31.667	73	94	198	62	67	110	36	97	43	68	90	37	45	37	184	40
32	72	95	193	62	67	109	36	95	43	67	88	36	44	38	180	40
32.333	73	95	192	61	66	109	37	94	43	67	88	36	44	38	178	41
32.667	71	93	186	60	64	107	35	92	41	65	86	35	42	38	173	39
33	70	92	185	58	63	106	35	91	41	65	86	35	43	39	171	39
33.333	70	93	181	59	64	107	35	90	42	65	84	34	41	39	167	39
33.667	70	93	181	58	62	106	36	90	41	63	84	35	40	39	166	39
34	68	90	174	57	61	105	35	88	41	62	83	34	40	39	160	37
34.333	67	91	173	55	60	104	35	87	41	62	82	33	38	39	157	37
34.667	67	91	169	54	61	105	35	86	40	61	81	33	39	38	155	36
35	67	91	165	54	60	103	35	86	39	62	81	32	38	39	152	36
35.333	67	90	163	54	59	103	35	84	40	61	81	33	38	39	149	36
35.667	65	89	161	53	58	102	35	83	39	59	78	32	36	39	147	35
36	66	89	158	52	58	101	34	81	38	59	77	31	37	39	142	35
36.333	63	89	154	49	56	101	35	81	38	58	76	30	36	37	139	34
36.667	62	89	152	50	57	100	34	81	38	58	76	30	35	39	138	34
37	63	87	150	49	55	99	34	82	37	57	77	29	35	38	135	35
37.333	62	87	148	49	54	99	34	80	37	57	73	30	35	38	133	33
37.667	62	87	145	48	54	99	34	80	37	56	74	30	34	37	128	32
38	62	86	144	47	53	97	33	79	36	56	73	29	33	38	127	33
38.333	62	87	142	46	53	98	33	78	36	55	71	28	33	38	124	31
38.667	62	86	140	47	52	97	34	78	35	54	71	28	32	37	122	31
39	62	85	136	44	51	96	34	77	35	54	69	28	32	37	120	30
39.333	63	86	137	46	51	96	34	76	36	54	70	29	32	38	118	31
39.667	63	85	134	45	52	96	34	78	35	53	69	28	32	38	115	31
40	64	85	133	43	51	96	34	76	35	54	68	27	31	38	113	30
40.333	64	86	133	44	51	118	35	77	35	53	67	27	31	37	112	30
40.667	63	86	131	43	50	95	34	77	36	54	67	28	30	38	108	30
41	65	86	131	43	51	96	35	77	36	54	67	27	31	38	108	30
41.333	64	86	129	42	49	94	34	76	35	52	66	27	29	37	106	29
41.667	66	86	131	43	49	95	38	77	35	54	66	27	29	38	105	29
42	65	88	128	42	49	94	35	76	36	54	65	26	30	37	103	29
42.333	64	88	126	42	57	93	34	77	35	52	66	26	28	36	100	28
42.667	64	88	126	41	48	93	35	78	35	54	65	25	28	36	100	28
43	65	87	125	41	48	93	34	78	35	53	63	25	28	36	96	29
43.333	63	86	122	41	48	93	34	80	33	52	62	25	27	36	93	27
43.667	62	86	123	40	47	92	34	77	34	53	61	25	28	35	94	28
44	62	85	122	40	47	92	34	75	34	51	62	25	27	34	93	27
44.333	60	85	120	40	46	90	33	75	33	51	59	24	27	34	90	26
44.667	60	85	121	39	47	89	34	76	33	52	61	24	26	34	88	26
45	59	86	119	39	47	89	33	75	33	52	59	24	26	34	87	26
45.333	59	84	119	40	47	88	34	75	34	52	59	25	26	34	86	26
45.667	59	85	120	40	47	90	35	75	33	52	58	25	27	33	84	26
46	58	83	116	39	46	86	33	74	33	51	58	24	26	33	82	25
46.333	58	83	118	39	46	87	35	75	33	52	57	25	27	33	82	26
46.667	56	83	117	39	45	87	35	73	33	51	56	24	25	32	79	25
47	56	83	116	39	47	87	34	72	33	50	56	24	25	32	80	24
47.333	55	81	118	38	48	85	35	73	32	51	55	23	25	31	78	25
47.667	56	83	118	40	52	86	37	75	34	52	56	25	26	33	78	26
48	54	82	115	39	49	85	35	74	33	51	55	24	26	31	77	25
48.333	54	82	116	40	49	85	35	74	32	51	54	24	26	31	75	25
48.667	54	82	116	41	48	85	36	73	33	51	54	25	26	32	75	26
49	54	82	117	40	50	85	37	75	33	51	53	24	27	31	74	26
49.333	53	81	116	40	50	83	35	72	33	51	53	23	26	30	72	24
49.667	53	81	116	39	54	83	36	73	34	51	54	24	26	31	72	25
50	53	81	116	41	51	82	36	74	34	51	54	25	27	31	71	26
50.333	52	80	116	41	51	81	36	72	32	49	51	23	25	30	70	24
50.667	53	82	117	43	53	82	38	74	35	51	53	25	27	32	69	26
51	51	81	116	43	53	81	38	72	34	50	51	24	26	30	68	26
51.333	51	82	117	43	53	81	38	73	34	51	52	25	27	31	67	25
51.667	50	81	117	42	54	81	38	73	35	50	50	25	27	31	66	26
52	50	80	117	43	54	81	39	72	34	49	51	25	27	32	66	26
52.333	52	81	118	45	56	82	41	73	34	49	51	25	28	32	65	26
52.667	51	80	118	44	57	82	42	74	34	48	51	25	28	32	65	27
53	50	80	116	44	57	81	42	72	34	48	49	25	27	32	63	27
53.333	50	79	117	44	56	80	43	73	34	48	50	26	28	32	62	26
53.667	50	78	118	45	57	79	42	71	33	47	49	24	28	33	62	25
54	49	79	117	45	57	80	42	72	34	48	49	25	28	32	61	26
54.333	48	78	117	45	58	79	44	71	34	47	49	25	28	33	61	26
54.667	48	78	115	45	58	79	46	71	34	47	49	25	28	33	60	26
55	49	80	117	45	59	79	46	72	34	47	50	26	29	35	60	27
55.333	49	79	115	45	59	80	47	72	34	47	49	25	29	34	59	27
55.667	48	78	115	45	59	79	47	73	34	46	48	24	28	35	58	27
56	49	78	115	46	59	79	48	72	33	47	48	25	29	35	58	27
56.333	48	79	115	46	59	77	48	73	33	46	47	24	28	35	57	27
56.667	49	78	114	46	61	78	49	73	34	45	46	24	28	35	56	26
57	48	78	114	46	61	79	52	73	34	47	48	25	29	36	56	27
57.333	47	78	113	46	61	77	52	74	32	46	46	24	28	36	54	26
57.667	47	78	111	44	61	77	52	73	31	46	46	24	27	35	54	26
58	48	79	117	46	60	79	53	73	32	47	47	25	28	36	55	28
58.333	47	79	110	45	61	77	53	74	31	46	45	25	27	35	52	26
58.667	48	80	111	45	61	78	55	74	31	47	45	25	27	37	53	26
59	48	79	110	46	61	77	56	74	32	47	45	25	28	36	53	27
59.333	46	78	107	45	60	76	55	73	30	45	43	23	26	35	50	26
59.667	48	80	108	46	61	78	57	75	31	46	45	25	27	36	51	27
60	48	79	108	46	61	77	57	74	30	45	44	24	27	35	51	27
60.333	48	80	106	46	62	77	57	74	30	46	44	24	27	36	50	27
60.667	47	79	105	45	60	76	57	73	30	46	42	24	27	36	50	27
61	48	78	105	45	60	76	58	74	30	45	43	24	26	36	49	27
61.333	47	78	103	44	60	76	59	73	28	45	42	22	24	36	47	26
61.667	48	79	104	46	62	77	61	74	30	46	42	24	27	36	48	28
62	47	78	103	44	60	75	59	74	28	46	42	23	26	35	47	27
62.333	48	79	101	45	60	76	61	75	28	45	43	23	25	35	47	27
62.667	48	80	102	45	61	77	62	74	29	46	43	24	26	36	47	28
63	48	78	100	44	60	76	63	74	28	46	42	23	25	35	46	28
63.333	47	79	100	45	61	75	63	74	28	46	41	23	26	35	46	28
63.667	47	78	98	45	61	75	62	74	27	46	42	23	25	33	45	27
64	48	79	97	44	60	74	62	73	27	45	40	23	25	34	44	28
64.333	48	79	99	45	61	74	64	75	27	46	41	24	26	34	44	28
64.667	47	79	96	44	60	73	64	74	26	46	40	23	26	33	43	28
65	47	78	97	44	60	73	64	73	26	45	39	22	25	33	44	27
65.333	48	79	97	45	61	74	64	75	28	47	41	23	25	33	44	28
65.667	47	79	96	43	60	72	63	73	26	45	40	22	24	32	42	28
66	48	79	96	45	61	73	66	74	27	47	42	23	25	33	43	28
66.333	47	79	95	44	61	72	65	73	26	45	41	23	25	32	42	28
66.667	48	80	96	45	60	72	66	75	26	47	41	23	25	33	42	29
67	48	79	95	43	59	70	65	73	26	46	40	23	24	32	41	28
67.333	46	77	94	43	59	70	65	74	26	46	40	23	25	31	41	28
67.667	47	78	93	43	59	70	65	73	26	48	40	23	24	30	40	28
68	47	79	94	44	58	70	65	74	25	47	39	23	24	29	40	28
68.333	47	79	93	43	58	69	65	75	27	49	40	23	24	29	41	28
68.667	47	79	92	43	59	69	65	75	26	48	40	23	24	28	40	28
69	45	79	92	42	57	68	64	74	25	48	40	22	24	27	40	28
69.333	46	77	91	42	57	68	65	72	25	48	39	21	24	27	39	27
69.667	47	79	90	42	58	68	65	74	25	49	40	22	24	26	39	28
70	48	79	91	42	57	68	64	74	26	49	39	23	24	26	39	29
70.333	48	78	91	42	57	68	64	73	26	49	40	22	24	26	38	28
70.667	47	78	89	42	57	68	65	72	24	48	40	22	26	26	38	29
71	48	80	89	42	57	67	66	73	26	48	39	22	24	24	38	30
71.333	47	78	88	42	57	68	65	71	24	48	39	22	24	24	38	29
71.667	47	78	88	42	57	67	66	71	24	48	39	23	24	23	37	29
72	45	77	87	41	56	65	65	69	24	47	39	23	24	22	36	28
72.333	46	77	87	42	57	66	66	70	25	48	38	23	24	21	37	30
72.667	46	78	89	41	58	67	66	70	25	49	40	23	24	21	37	30
73	46	79	90	43	56	66	66	70	25	50	40	24	25	21	37	31
73.333	45	76	88	42	57	64	65	69	24	50	39	23	24	21	37	31
73.667	45	77	89	42	57	64	66	68	24	50	39	23	24	20	36	30
74	44	76	89	43	56	63	66	69	24	51	40	24	25	19	36	31
74.333	45	77	89	43	57	64	66	68	25	50	39	24	25	20	37	32
74.667	44	77	89	42	56	63	66	67	25	51	41	23	25	19	35	31
75	44	77	90	43	57	63	67	67	25	51	41	25	26	19	37	33
75.333	46	77	91	44	58	63	68	68	26	51	42	25	26	19	37	34
75.667	43	76	90	43	56	62	66	68	25	51	41	23	25	18	36	32
76	45	77	90	44	57	63	67	67	25	51	42	25	27	18	37	33
76.333	44	76	90	44	57	62	67	67	25	50	40	25	26	17	36	33
76.667	45	78	91	44	57	63	68	67	26	52	42	25	25	18	37	34
77	44	77	91	44	58	62	68	65	26	51	41	25	26	17	36	33
77.333	45	78	92	50	58	62	69	66	26	52	43	26	27	17	36	34
77.667	45	77	91	44	58	63	67	65	26	51	41	26	27	17	36	34
78	45	78	91	46	58	64	69	65	26	52	42	26	27	16	36	35
78.333	44	77	91	45	57	62	68	64	25	51	42	25	27	16	36	35
78.667	44	76	91	45	57	62	67	64	26	51	43	26	27	16	37	34
79	45	76	92	47	59	62	69	64	27	51	44	26	28	17	37	35
79.333	43	76	92	47	58	61	70	63	28	52	43	27	28	15	37	36
79.667	44	76	92	46	59	60	69	62	27	51	43	27	28	15	36	37
80	44	77	92	47	59	60	69	63	27	52	44	28	30	16	38	37
80.333	44	77	90	47	60	59	70	63	27	51	44	27	28	16	37	37
80.667	45	77	93	47	60	59	70	63	28	52	44	28	29	16	38	37
81	45	76	92	48	60	67	70	62	28	52	44	28	30	16	38	38
81.333	45	77	94	48	60	60	72	61	27	51	45	28	29	16	37	38
81.667	44	76	91	46	59	59	70	60	27	50	44	27	29	15	36	37
82	45	76	93	48	62	61	71	61	28	52	45	28	29	15	38	39
82.333	45	75	91	50	61	59	70	60	28	51	45	28	30	15	38	38
82.667	44	78	92	48	61	58	70	60	28	51	45	28	31	16	37	39
83	45	76	93	48	61	59	71	60	27	51	45	28	31	15	37	39
83.333	43	75	91	47	59	58	70	59	27	51	45	29	31	15	38	38
83.667	45	75	91	48	60	58	71	59	27	50	45	29	32	15	38	40
84	44	75	92	49	60	58	71	58	28	51	46	29	31	14	38	40
84.333	45	76	92	49	62	59	71	59	29	52	46	29	33	15	39	41
84.667	45	75	90	48	60	57	71	57	28	50	46	29	31	14	39	40
85	44	75	90	49	62	59	71	56	28	50	46	29	31	14	39	41
85.333	45	74	91	49	61	60	72	58	29	52	47	30	32	15	40	42
85.667	45	76	90	57	63	58	71	56	29	51	47	30	33	15	39	40
86	45	74	90	49	62	59	70	56	28	51	47	30	32	14	39	41
86.333	44	74	91	49	62	58	71	55	29	51	48	30	32	14	39	42
86.667	45	74	91	49	62	60	72	55	29	51	49	31	33	15	40	42
87	45	74	90	50	63	60	71	55	29	52	48	31	33	15	39	43
87.333	44	73	90	50	63	58	71	55	29	51	48	31	33	13	40	42
87.667	44	73	90	49	62	57	71	53	28	51	48	31	33	13	40	41
88	44	74	91	50	62	59	72	54	29	51	49	32	34	14	40	43
88.333	45	73	90	49	63	58	71	54	29	51	49	31	34	14	41	43
88.667	43	72	89	49	62	58	71	53	29	51	48	32	34	13	40	43
89	45	72	90	50	63	57	71	53	29	52	49	33	35	14	41	43
89.333	44	71	89	50	62	57	70	53	29	52	49	32	35	13	40	43
89.667	43	70	89	49	62	57	71	51	29	51	48	34	34	13	40	43
90	44	70	89	49	62	56	70	51	29	51	48	33	34	12	40	43
90.333	45	70	89	51	63	58	71	53	30	52	49	34	35	13	41	44
90.667	44	70	89	50	61	57	70	51	29	51	48	34	35	13	41	43
91	45	70	89	51	63	57	71	51	30	51	50	34	35	13	41	44
91.333	44	68	88	50	61	56	69	50	30	51	52	34	35	12	40	44
91.667	46	69	90	51	62	56	70	50	29	51	53	34	36	13	41	44
92	46	68	90	51	63	57	70	50	30	53	51	34	36	12	42	45
92.333	45	67	89	51	63	57	69	50	29	52	52	35	36	12	42	46
92.667	44	69	89	50	62	56	70	51	30	52	52	36	36	12	42	45
93	43	67	88	50	61	56	69	50	29	51	49	35	35	11	41	44
93.333	44	65	86	50	60	56	69	50	30	51	51	36	35	12	42	46
93.667	43	66	88	51	61	55	69	48	29	52	50	36	35	11	43	45
94	42	64	84	49	60	55	67	47	29	51	50	35	35	11	42	44
94.333	43	64	83	49	60	56	67	47	29	51	51	36	35	11	43	44
94.667	45	68	86	49	60	56	67	47	30	52	51	36	37	11	43	45
95	44	63	83	48	59	56	66	47	29	51	49	35	36	10	42	44
95.333	43	64	85	49	60	57	66	47	29	50	50	35	35	9	43	44
95.667	42	65	82	47	60	57	65	46	27	49	49	34	35	10	42	43
96	44	65	82	48	61	57	66	46	28	50	50	36	37	10	43	44
96.333	42	63	83	48	59	56	65	46	28	49	49	35	35	9	43	44
96.667	43	62	81	47	58	55	64	45	28	49	48	35	36	8	42	43
97	43	63	83	48	58	56	64	45	28	50	49	35	36	9	42	44
97.333	41	60	80	47	57	54	63	44	27	49	49	35	36	8	43	44
97.667	41	61	82	47	58	55	64	44	27	50	50	35	37	8	44	45
98	41	60	82	48	56	54	64	42	28	50	49	36	37	8	44	44
98.333	42	59	81	48	56	53	63	42	27	50	49	36	37	8	43	44
98.667	42	60	84	48	57	55	64	42	29	52	50	37	38	9	44	44
99	42	60	84	50	58	55	63	42	28	52	50	38	38	8	45	45
99.333	41	58	81	47	56	55	63	42	28	51	49	37	38	8	43	45
99.667	42	58	82	49	57	56	63	42	27	52	51	38	38	8	45	44
100	41	56	81	73	56	54	62	42	27	50	50	36	38	8	45	45
100.333	40	56	81	48	56	53	61	40	28	50	49	37	38	6	45	44
100.667	41	56	80	48	55	54	61	40	28	50	50	36	38	6	45	45
101	42	56	80	47	55	54	61	39	28	50	49	37	38	7	46	44
101.333	41	53	80	48	54	53	61	38	27	49	48	37	38	6	46	44
101.667	42	55	80	48	55	54	61	38	29	50	49	38	39	7	46	45
102	42	53	80	48	55	54	61	38	29	51	50	37	39	6	47	45
102.333	41	51	79	47	54	53	61	37	28	49	49	37	38	5	46	45
102.667	41	51	79	47	52	53	61	37	28	50	49	37	38	6	46	44
103	42	50	79	47	52	52	60	36	28	49	49	37	38	5	46	44
103.333	41	50	79	47	53	53	61	36	28	49	47	38	42	5	47	44
103.667	42	49	79	48	53	53	60	36	28	50	49	38	38	5	48	43
104	42	48	80	47	53	53	60	35	28	50	50	38	40	5	47	45
104.333	42	48	78	48	53	53	60	35	28	49	49	38	40	5	47	45
104.667	40	46	78	47	53	52	59	34	27	48	48	38	39	5	48	44
105	42	45	77	47	51	53	58	34	27	48	48	38	39	4	48	43
105.333	43	45	78	48	52	53	60	34	28	48	49	36	39	4	49	44
105.667	41	44	77	47	52	52	58	33	28	48	49	39	39	4	48	44
106	42	44	78	47	52	53	58	32	29	52	48	38	39	4	49	44
106.333	43	44	77	48	52	52	59	32	30	49	49	39	40	4	49	45
106.667	44	44	78	49	52	53	59	32	29	48	49	38	40	5	49	44
107	43	43	78	48	51	53	58	32	29	48	49	38	40	4	49	45
107.333	43	41	76	47	51	53	57	31	28	48	48	38	40	4	49	44
107.667	44	41	76	47	50	52	58	31	29	47	48	39	40	3	49	45
108	43	41	79	48	51	53	57	31	29	48	48	38	41	4	50	44
108.333	44	40	78	46	51	52	57	30	28	47	48	38	41	3	50	45
108.667	44	39	77	47	51	51	56	30	29	46	47	38	41	3	50	44
109	44	38	76	47	50	52	56	30	29	47	48	38	41	3	50	44
109.333	44	37	77	47	50	52	56	28	28	46	47	38	41	3	50	44
109.667	45	37	77	48	50	52	57	29	29	47	49	39	41	3	50	45
110	46	36	77	48	50	51	56	29	29	45	48	39	41	3	51	45
110.333	44	35	80	47	48	50	55	27	28	46	47	38	41	2	49	43
110.667	44	34	76	47	48	51	54	27	29	45	47	38	41	2	51	44
111	44	33	75	47	49	50	53	27	28	45	46	39	41	2	50	44
111.333	45	32	74	46	47	49	52	26	27	44	47	37	40	2	49	43
111.667	45	32	76	51	48	50	53	26	29	45	47	38	41	2	51	43
112	46	33	77	47	50	51	53	27	29	46	47	39	42	2	52	44
112.333	45	31	75	46	47	49	52	25	29	44	46	39	42	2	50	43
112.667	45	30	75	46	47	49	52	25	28	45	45	38	41	2	51	43
113	46	30	75	47	48	50	51	25	30	45	46	38	42	1	51	44
113.333	47	30	76	47	48	49	52	25	29	45	47	39	42	1	52	47
113.667	46	28	76	47	48	48	51	24	30	46	47	39	43	1	52	45
114	45	27	76	46	47	48	50	23	29	45	46	38	42	1	51	44
114.333	45	26	75	46	46	48	49	23	29	44	46	38	42	0	51	45
114.667	46	26	75	47	46	47	49	22	29	44	46	40	42	2	52	45
115	47	25	75	46	47	48	49	23	29	43	47	39	42	2	52	44
115.333	46	24	75	47	47	47	52	22	30	44	47	39	43	1	52	44
115.667	46	24	74	46	47	47	46	20	30	43	48	38	42	1	52	44
116	46	23	76	47	47	47	48	22	30	44	47	39	44	2	53	45
116.333	48	23	74	47	47	46	47	21	30	44	47	40	44	2	54	46
116.667	45	21	75	46	46	46	46	20	29	42	46	38	43	0	53	46
117	46	21	79	47	46	46	45	20	30	44	46	39	43	1	54	46
117.333	46	20	73	45	44	45	44	19	30	42	45	39	42	1	52	46
117.667	46	19	72	46	45	45	44	20	29	43	46	38	42	1	53	46
118	47	18	72	45	45	44	43	19	29	43	46	39	42	0	54	46
118.333	45	17	73	45	43	43	41	17	28	42	44	37	42	-1	52	47
118.667	46	16	72	45	43	43	41	18	28	42	45	38	41	0	52	47
119	46	16	73	45	43	42	42	18	30	43	45	39	42	0	52	48
119.333	46	16	72	45	42	42	41	17	30	42	44	38	43	0	53	48
119.667	45	14	71	43	41	40	39	17	28	42	43	38	41	-2	52	47
