# Supplementary material for: Circadian oscillations in Trichoderma atroviride and the role of core clock components in secondary metabolism, development, and mycoparasitism against the phytopathogen Botrytis cinerea
Source: eLife. 2022 Aug 11;11:e71358. doi: 10.7554/eLife.71358 (PMC9427114; doi:10.7554/eLife.71358)
Supplement: Figure 2—source data 1. — Data is organized in individual sheets following the same order as in Figure 2. [file elife-71358-fig2-data1.xlsx]

## Sheet: Figure 2 A (GYEC+PEAS CBOX LD)
Time	cbox::oluc
0	198	253	121	143	138	121		Data available in GraphPad format (.pzfx) upon request.
0.333	198	249	126	152	141	126
0.667	181	237	120	146	133	123
1	168	220	114	139	125	119
1.333	156	205	107	128	115	114
1.667	145	193	99	121	110	109
2	133	180	92	112	101	102
2.333	123	168	87	103	95	97
2.667	113	156	82	97	90	93
3	105	146	77	93	87	89
3.333	97	137	72	84	81	83
3.667	93	131	70	81	78	79
4	87	122	65	79	75	74
4.333	83	115	62	74	71	70
4.667	79	109	61	70	68	65
5	74	104	59	69	75	61
5.333	70	97	54	64	62	57
5.667	66	92	54	64	61	55
6	62	87	52	61	58	51
6.333	60	83	50	59	56	49
6.667	57	80	49	55	55	45
7	55	77	46	55	54	44
7.333	52	68	46	52	50	40
7.667	50	64	45	51	49	38
8	50	63	43	51	49	37
8.333	46	59	42	49	46	34
8.667	46	57	42	48	47	33
9	45	55	42	47	46	32
9.333	44	54	40	46	45	30
9.667	42	52	39	44	44	29
10	42	50	39	44	43	27
10.333	41	50	39	44	43	28
10.667	41	49	39	45	43	26
11	38	46	37	43	43	26
11.333	39	47	39	42	42	25
11.667	38	46	39	42	43	25
12	37	45	38	42	41	25
12.333	38	44	39	41	42	23
12.667	36	44	38	42	43	23
13	37	43	39	40	42	23
13.333	37	42	39	41	42	22
13.667	37	42	38	40	42	22
14	36	42	39	41	43	22
14.333	37	42	40	40	42	22
14.667	37	41	40	43	44	22
15	38	41	41	41	44	22
15.333	38	43	42	42	44	22
15.667	38	42	41	42	45	23
16	38	43	43	41	45	23
16.333	38	42	41	40	44	22
16.667	38	42	43	40	44	22
17	38	42	44	41	44	22
17.333	39	43	43	41	46	22
17.667	39	42	44	41	46	21
18	38	43	45	40	46	21
18.333	39	42	47	40	46	22
18.667	40	42	47	41	47	23
19	39	43	48	41	47	23
19.333	40	44	49	41	48	23
19.667	41	43	49	42	48	22
20	40	44	50	43	49	24
20.333	41	44	50	42	48	23
20.667	41	45	51	43	50	24
21	41	43	51	41	50	23
21.333	40	43	53	42	51	23
21.667	41	44	54	43	50	23
22	42	45	55	42	51	24
22.333	42	44	56	43	52	24
22.667	41	44	55	43	52	23
23	42	45	56	43	52	24
23.333	42	44	57	43	53	23
23.667	43	45	57	44	54	23
24	43	45	59	44	54	23
24.333	42	44	59	44	55	23
24.667	43	46	60	45	55	24
25	43	45	61	45	56	24
25.333	43	47	61	46	56	24
25.667	44	47	63	47	58	23
26	43	47	62	46	57	23
26.333	45	48	66	48	58	25
26.667	44	48	67	47	60	25
27	45	48	67	48	60	26
27.333	45	48	67	48	61	24
27.667	45	54	69	49	61	25
28	44	48	69	47	61	25
28.333	44	49	71	49	63	26
28.667	45	49	72	50	62	25
29	45	49	72	50	63	25
29.333	45	48	72	49	63	24
29.667	45	48	72	48	63	25
30	44	47	72	50	62	24
30.333	42	48	71	48	64	24
30.667	43	48	72	50	64	24
31	44	49	74	50	64	26
31.333	44	48	73	49	64	25
31.667	42	48	73	48	63	24
32	40	46	74	48	64	24
32.333	42	46	72	49	63	25
32.667	41	46	73	48	63	24
33	40	46	73	48	62	23
33.333	39	46	73	47	62	24
33.667	40	46	73	48	63	23
34	40	45	72	46	63	24
34.333	39	45	73	46	62	24
34.667	38	45	72	46	62	23
35	38	44	71	46	61	23
35.333	38	45	73	47	62	24
35.667	36	43	72	45	61	23
36	37	44	71	45	61	22
36.333	36	43	70	44	60	22
36.667	35	44	70	44	59	23
37	24,*	34	60	33	47	11,*
37.333	35	43	71	43	58	23
37.667	34	42	69	43	59	22
38	34	42	71	43	59	23
38.333	34	42	70	42	57	22
38.667	33	42	69	41	57	22
39	32	41	68	41	57	23
39.333	33	41	69	41	57	22
39.667	32	41	69	41	57	22
40	30	40	67	42	55	21
40.333	31	41	68	40	56	23
40.667	32	39	66	38	55	22
41	30	40	67	39	55	22
41.333	30	41	67	37	54	22
41.667	31	40	67	38	55	23
42	30	40	67	38	54	22
42.333	30	40	65	37	54	22
42.667	30	40	66	37	54	22
43	29	41	66	38	53	23
43.333	30	40	65	37	53	22
43.667	28	40	66	37	53	22
44	28	41	65	37	52	22
44.333	28	40	65	36	51	22
44.667	28	39	66	35	53	21
45	29	40	66	37	53	23
45.333	29	40	66	36	52	21
45.667	29	41	66	37	52	23
46	28	41	66	36	52	22
46.333	28	41	66	37	53	22
46.667	29	42	67	38	54	23
47	29	41	67	36	54	23
47.333	28	42	67	37	53	22
47.667	30	43	68	36	54	23
48	30	42	68	37	55	24
48.333	29	42	68	37	54	24
48.667	31	44	69	38	55	23
49	30	44	71	37	56	23
49.333	31	43	70	38	55	23
49.667	31	45	71	38	57	23
50	31	45	71	38	57	24
50.333	31	46	72	38	56	24
50.667	31	45	72	37	57	24
51	32	47	74	40	59	24
51.333	32	48	74	38	58	25
51.667	33	48	74	39	59	25
52	31	46	71	37	55	22
52.333	33	48	74	40	57	24
52.667	34	49	75	40	58	26
53	34	51	75	40	59	26
53.333	34	51	75	41	60	26
53.667	34	51	76	40	58	26
54	34	51	75	40	58	25
54.333	35	50	74	40	58	26
54.667	34	51	74	40	58	26
55	35	52	73	40	57	26
55.333	34	51	72	40	57	26
55.667	34	52	72	39	56	24
56	34	51	72	40	55	26
56.333	34	50	70	39	57	25
56.667	33	50	71	38	54	25
57	33	52	69	38	53	24
57.333	33	50	67	38	54	24
57.667	33	50	67	38	53	24
58	31	50	67	37	52	23
58.333	33	50	65	36	51	24
58.667	34	49	64	36	51	23
59	32	49	65	37	50	24
59.333	31	48	62	35	48	23
59.667	31	48	63	37	49	24
60	31	47	62	35	49	23
60.333	31	48	61	36	48	23
60.667	31	47	60	34	46	22
61	30	47	58	34	47	22
61.333	29	47	58	33	45	22
61.667	29	47	57	33	45	23
62	28	45	55	33	44	22
62.333	28	45	55	32	44	20
62.667	29	44	55	31	43	21
63	27	43	54	31	43	20
63.333	27	44	54	32	43	21
63.667	27	44	52	31	42	20
64	26	44	51	31	42	20
64.333	27	43	51	31	42	20
64.667	26	44	49	30	40	21
65	25	43	48	31	41	20
65.333	26	43	47	30	41	19
65.667	25	41	46	29	40	19
66	25	42	46	30	41	19
66.333	25	42	46	29	40	18
66.667	24	40	43	28	38	18
67	24	42	43	28	38	19
67.333	24	41	43	29	43	18
67.667	25	41	44	29	39	19
68	24	42	43	28	39	18
68.333	24	41	42	29	38	19
68.667	24	42	43	28	38	18
69	23	40	41	27	37	18
69.333	23	41	41	29	37	18
69.667	23	41	42	28	38	17
70	24	40	41	27	37	18
70.333	23	40	42	27	37	18
70.667	23	41	42	27	37	17
71	24	40	41	27	36	17
71.333	24	41	42	27	38	17
71.667	22	40	40	27	37	17
72	23	41	42	27	37	17
72.333	23	40	41	26	38	17
72.667	24	41	42	27	37	18
73	23	41	42	26	38	18
73.333	25	41	42	28	38	18
73.667	24	42	42	27	38	18
74	25	42	43	28	40	18
74.333	25	42	43	29	39	19
74.667	25	43	44	28	40	18
75	25	43	44	29	39	19
75.333	25	44	43	28	40	19
75.667	25	43	43	28	41	19
76	26	45	45	29	40	20
76.333	26	44	45	30	41	20
76.667	25	44	44	29	41	20
77	27	46	46	29	41	21
77.333	26	44	44	29	41	20
77.667	26	45	43	29	41	20
78	26	44	44	29	41	20
78.333	28	46	44	29	41	21
78.667	27	44	43	28	41	21
79	25	44	44	29	40	20
79.333	27	45	44	33	41	21
79.667	27	44	43	29	41	23
80	27	45	43	29	40	21
80.333	25	45	42	29	40	21
80.667	26	45	42	29	40	22
81	27	44	41	29	40	21
81.333	25	44	40	29	39	20
81.667	26	44	40	29	40	20
82	25	42	39	28	39	20
82.333	26	43	39	29	38	20
82.667	24	42	38	27	38	19
83	25	43	37	27	38	21
83.333	25	42	38	27	37	20
83.667	24	42	36	27	38	19
84	25	42	36	27	38	20
84.333	25	43	36	28	37	20
84.667	24	42	34	26	35	19
85	24	40	34	27	35	19
85.333	23	40	33	25	34	19
85.667	23	40	33	25	34	19
86	24	41	33	26	35	20
86.333	23	40	33	25	34	19
86.667	22	40	32	26	33	19
87	22	38	29	24	32	18
87.333	22	45	31	25	33	18
87.667	22	37	30	24	31	17
88	21	38	29	35	32	17
88.333	21	38	28	24	31	19
88.667	20	38	27	23	30	17
89	21	37	28	24	30	18
89.333	21	37	27	23	31	18
89.667	20	43	26	23	30	16
90	21	36	26	23	31	17
90.333	21	35	26	22	30	16
90.667	20	35	25	22	29	17
91	20	36	26	22	29	17
91.333	20	35	25	22	29	16
91.667	19	34	24	21	28	16
92	18	34	25	21	28	16
92.333	19	35	25	22	28	16
92.667	20	34	24	22	28	16
93	18	33	23	21	27	16
93.333	18	33	23	21	29	16
93.667	19	34	23	21	28	16
94	19	34	24	20	28	15
94.333	18	33	23	20	27	16
94.667	19	33	26	21	29	16
95	18	33	23	20	28	15
95.333	18	32	22	20	28	14
95.667	18	34	23	21	29	16
96	18	33	23	20	28	16
96.333	18	33	22	20	27	15
96.667	19	34	24	21	29	16
97	19	33	24	21	29	16
97.333	18	34	23	21	29	16
97.667	18	33	23	21	28	16
98	19	33	24	21	30	16
98.333	19	33	23	21	30	15
98.667	20	33	24	20	30	17
99	19	34	24	21	30	16
99.333	20	35	24	22	31	18
99.667	20	35	24	22	32	18
100	21	36	25	22	31	17
100.333	21	35	24	22	31	18
100.667	20	35	25	21	30	18
101	22	37	25	22	32	18
101.333	21	35	24	22	31	19
101.667	23	36	26	23	33	19
102	22	36	24	23	31	19
102.333	22	36	24	22	32	19
102.667	23	37	26	23	33	20
103	22	36	25	22	32	19
103.333	22	37	25	23	32	19
103.667	24	38	25	23	32	21
104	24	37	25	23	32	21
104.333	23	37	24	23	32	19
104.667	22	36	24	23	31	19
105	22	36	24	22	32	19
105.333	23	38	25	23	32	20
105.667	22	37	24	23	31	20
106	22	36	23	22	30	19
106.333	21	36	22	21	30	19
106.667	22	35	22	22	31	19
107	22	36	22	22	30	19
107.333	21	36	20	21	29	18
107.667	22	35	21	21	28	18
108	22	35	21	21	28	18
108.333	21	34	20	21	28	18
108.667	22	35	20	21	29	18
109	20	34	19	20	28	17
109.333	20	34	19	20	27	17
109.667	21	33	18	21	27	16
110	20	32	18	19	25	16
110.333	19	33	18	20	25	16
110.667	20	33	18	19	25	16
111	19	32	18	19	25	15
111.333	19	33	17	19	24	16
111.667	19	33	18	20	26	16
112	19	32	16	19	24	15
112.333	19	32	16	19	24	16
112.667	18	32	15	18	23	14
113	18	31	16	18	23	15
113.333	18	31	16	19	24	15
113.667	18	32	15	18	24	15
114	18	31	15	18	23	14
114.333	18	31	15	18	23	16
114.667	17	29	14	17	22	14
115	17	30	15	17	22	13
115.333	18	30	14	18	21	14
115.667	17	29	14	17	22	13
116	18	30	15	18	22	14
116.333	17	29	14	16	21	13
116.667	16	29	13	16	22	14
117	16	29	13	17	21	13
117.333	15	28	13	16	21	12
117.667	17	30	13	18	21	13
118	15	29	13	15	20	12
118.333	15	27	12	16	19	11
118.667	17	28	13	17	20	12
119	16	29	13	16	20	13
119.333	16	28	13	16	21	12
119.667	14	28	13	15	20	12

## Sheet: Figure 2 B (GYEC+PEAS CBOX LP)
Time	cbox::oluc
0	90.25	62	86.75	118.5	136.75	109.75
0.333	82.5	54.75	74.75	124.25	143	125.75
0.667	79.75	52.25	72.5	121	139	113.75
1	75	49.5	66.5	105	123.5	97.75
1.333	70.25	45.5	60	91.25	112.25	89
1.667	66.5	42.5	56.25	85	106.75	85.25
2	64.25	41.75	54.5	80.25	101.75	81
2.333	63	39.75	52.75	76.5	97.25	78.25
2.667	60	37.75	49.75	72.25	93	75.5
3	59.25	36.5	48.5	69.25	90	72.5
3.333	58.25	36.25	48.25	66	87	70
3.667	57.5	34.5	47.25	63	82.75	66.5
4	56.25	33.5	45.75	59.75	79.25	64.5
4.333	55.5	33	45.25	55.75	76	61.75
4.667	55.25	32.25	45	54.25	73.75	60
5	54.75	31.5	44.25	51.25	71.25	57.75
5.333	52.5	29	41.75	49.25	69	56.25
5.667	55	31.25	44.5	47	66.5	54.25
6	54.75	31	44.5	44.75	64.5	52.25
6.333	54.5	31.5	45	43	62	50.25
6.667	54.75	31	43.75	41.25	60.25	49.25
7	54.25	30.25	44.25	40	58.75	48
7.333	54.75	30	44.25	37.5	56.5	47.75
7.667	53.5	29.5	44	37.25	55.5	46
8	54.25	29.75	44.5	35.25	53.75	44.25
8.333	53.5	30	44.5	33.75	52.25	42.25
8.667	53.5	29.25	44.75	33.25	51	42
9	54	29.75	45.75	31.25	50.5	40.5
9.333	53.5	29.25	45.25	30.75	48	40.25
9.667	53.25	29.25	45.25	31	48.25	40
10	52	29.75	45	29.75	46.25	39.25
10.333	52.25	28.75	45.75	29.25	45.75	39
10.667	53	29	45.5	28.25	44.25	38.25
11	53	29	45.5	29	43.75	38.75
11.333	52.25	28.5	44.75	27.25	41.75	39.5
11.667	51.75	30.5	45.25	27.75	41.75	38
12	52	27.5	45	27	41.5	38
12.333	52.5	28	45.5	26.75	41.25	39.75
12.667	52.25	28.25	45.75	26.5	39.75	38
13	51.25	27.5	45.25	26.25	39.75	38
13.333	50.5	26.5	45	27	40	39.25
13.667	51.25	26.75	44.25	26.25	39.25	38.5
14	51	27.25	44.5	26.25	39.25	39.75
14.333	51	27.5	45	26.25	38	39
14.667	50.75	27	45	25.75	38	39.75
15	50	26.5	44.25	26	38.5	40.75
15.333	50	27	44.75	26.75	38.75	41.25
15.667	50.25	27.25	44.5	26.25	38.5	41.75
16	49.75	26	43	26.5	38.25	42
16.333	49	26.25	43.5	27	39	43
16.667	48.75	26.25	43.5	27	39	43.5
17	49	26.5	44	27.25	39.25	44
17.333	47.25	25.5	42.5	26.75	38.75	43.5
17.667	47.75	26.25	42.5	27	39.75	44.5
18	47.75	26	42	27.25	39.5	44.75
18.333	46.75	25	41.5	27	39.75	44.5
18.667	47	24.75	41.25	27.25	39.75	45.5
19	46.25	24.75	40.75	27	39.75	45.5
19.333	46.5	24.75	40.75	27	40.25	46.5
19.667	46.5	24.25	40.5	26.25	39.75	45.75
20	46	24.5	40	26.5	40.25	47
20.333	45.75	24.25	39	26.25	40.5	47
20.667	45	23.75	39	27	44	47.25
21	44.75	23	37.75	26.25	40.5	47
21.333	45.5	23.75	39.25	26	40.5	47
21.667	45	23.25	37.75	26.5	40.75	47.5
22	44.5	23.25	37.5	26	41.25	47.75
22.333	44.5	22.75	37.25	26	42.25	47.75
22.667	44.75	23.5	37.75	26	41.75	48
23	45	23	37	25.75	41.75	48
23.333	44.75	23.25	36.25	26.25	41.75	48.5
23.667	44.5	22.5	35.75	25.5	41.75	48
24	45	22.75	35.5	25.5	41.75	48.75
24.333	45.25	23.25	35.5	25.5	42.25	49.25
24.667	44.25	21.75	34.5	25.75	42.25	49.5
25	44.25	21.75	34.25	24.75	41.75	49
25.333	44.75	22.25	34.5	24.5	42.25	49
25.667	44.25	22	34	24.75	41.75	48.25
26	44.25	22	34.25	24.75	42	49.25
26.333	44.5	21.75	34.25	24	41.25	48.5
26.667	45	22.5	33.75	23.25	41	48.25
27	45	22.25	33.75	23.5	40.75	48
27.333	45	21.75	33.75	24.25	42.25	49.75
27.667	44	21.75	33	23.25	40.75	48.75
28	45.5	21.75	33.25	23.75	41.5	49.25
28.333	44.75	21.5	33.25	23	40.75	48.5
28.667	44	21	32.75	22	39.75	47.75
29	44.25	21	32.75	23.25	40.5	48.75
29.333	44	20.75	31.75	22.25	40	49
29.667	44	20.75	31.75	22.25	40.25	48.75
30	44	20.75	32.75	21.75	39.75	48.5
30.333	45.25	21.25	32.25	22	39.25	48.75
30.667	44.75	21	31.75	22.25	40.25	49.5
31	44	20.5	32	22.5	39.75	48.75
31.333	43.5	20.5	31	21.75	39.25	49
31.667	43.75	20.75	31.25	22.25	39.75	49
32	43.75	20.25	31.5	21.75	38.75	49.5
32.333	43	20.25	31	22	38.75	49.25
32.667	43.75	21	32.25	21.25	37.75	49
33	43.25	20.75	32	22.25	38.75	50
33.333	43	20	30.75	21.25	38.25	49.25
33.667	43	21	31.25	21.25	38	49.25
34	42.5	20	30.5	21	37.5	49.25
34.333	42.5	20	30.25	20.75	37.25	49
34.667	43	20.75	31.25	20.75	37.25	48.5
35	42.75	20.75	31.25	20	36.75	48.5
35.333	41.75	20	30.75	21	36.75	49.25
35.667	40.75	19.5	38.75	21	36.75	49.25
36	42.25	20.5	30.75	22.25	36.5	48.5
36.333	41	19.75	30	20.75	36.25	49
36.667	40.25	19.25	29.5	22	36.25	49
37	41.75	20.5	31	20.5	35.75	49.5
37.333	40.75	19.5	29.75	20.5	35.75	49.5
37.6667	40.75	20	29.5	20.75	35.75	49.75
38	41	20.25	29.75	20	35.25	48.5
38.3333	42.25	19.75	29.5	19.25	34.25	48.75
38.6667	39.75	19.5	28.75	19.75	34.5	48.75
39	40	20	29.75	20.5	35.25	49.75
39.3333	39.75	20.25	30	19.25	34	48.25
39.6667	39	19.5	29	20	34.75	49.75
40	39	19.75	29.25	19.5	34	48.75
40.3333	39.5	20.25	29.5	19	33.75	48.5
40.6667	38.75	20.5	28.75	19.5	34.75	49.25
41	39.25	20	29	19	33.25	48.5
41.3333	37.75	19	28.25	19.25	33.75	48.5
41.6667	37.75	19	27.75	19.75	33	49
42	37.75	19	27.25	19	33.25	48.5
42.3333	38.5	19.75	28.25	19.5	33.5	48.75
42.6667	37.25	19.5	27.75	19.75	33	48.5
43	37.5	19.5	28.5	18.75	32.25	48
43.3333	37.5	19.5	28	19.25	33.5	48.5
43.6667	36.5	19.5	27.25	19.25	32.25	47.75
44	36	18.75	27	19.5	33	48.25
44.3333	36.25	19	27.25	18.75	32.5	47.75
44.6667	36	18.5	27	18.5	32	47
45	35.5	18.5	27.25	18.75	31.75	47.5
45.3333	36.75	18.75	26.5	18	32	47.25
45.6667	35.75	19.25	27	19.25	31.75	47.5
46	35.25	18.75	26	18	31.25	47.25
46.3333	34.75	18.5	26.75	18.25	31.75	46.75
46.6667	34.5	19	26.75	18.25	31.75	46.5
47	34.25	18.75	26.25	18	31.5	46.25
47.3333	34.5	19	26.75	18.25	31.5	46.25
47.6667	34	18	26	17.5	30.75	46
48	19.75	17.75	1	-0.75	12	33
48.3333	66.25	67.25	35.75	26.5	42.5	65
48.6667	76.25	80.75	42	30.75	51.5	72.75
49	76.75	83.25	43.25	33.5	56.75	75
49.3333	78.25	84.25	44	33	57.25	74.75
49.6667	79.25	84	43.25	33.5	58.25	75.5
50	80.5	84.5	43.75	35	59.25	76.75
50.3333	80.5	84.75	42.75	34	58.5	75.25
50.6667	80.75	84.75	43.25	34.25	58	74.5
51	81.25	83.25	42.5	34	57.75	74
51.3333	80.75	83.25	43	34.5	58.25	73.75
51.6667	80	82.5	42	34.5	58	73
52	79.5	81.25	41.25	33.75	57	72
52.3333	78.5	81	41.5	33	56	69.5
52.6667	75.75	79	40.25	32.75	55.75	68.25
53	75	77.75	39.25	32.25	55	68.75
53.3333	74.5	77.5	38.75	33	54.75	66.75
53.6667	72.25	75.75	37.5	31.25	53.25	64.5
54	71	75.5	36.75	31	52.5	63.25
54.3333	69	74.5	35.5	30.25	51.75	61.5
54.6667	66.75	72.5	34.5	30	51	60.5
55	66.25	72	34	29.25	50	58.75
55.3333	64.5	70.25	32.75	28.25	48.5	56.75
55.6667	61.75	68.25	31.5	27.5	47.25	55.25
56	59.75	64.75	30	27	47.25	52.75
56.3333	58	63	29.5	25.5	43.75	51
56.6667	55.75	60.25	28.25	24.25	42	48.75
57	53.5	58.75	27.75	24	41.5	47.75
57.3333	51.25	55.75	26.25	23.25	39.75	46.25
57.6667	48.75	52.5	24.75	22.25	37.25	43.75
58	45.75	49.75	23	21.25	36.5	42.75
58.3333	45	48.25	23.25	20.75	34.75	41
58.6667	43.5	46.75	23	19.75	33.25	39.25
59	41	44	21.75	19.75	32.25	38.5
59.3333	39	41.75	20.75	19	31	36.75
59.6667	37.5	39.75	20.25	18.25	29.75	35.5
60	35.75	37.5	18.5	17	28.25	34.25
60.3333	34.25	36	18.75	16.5	27.75	33.5
60.6667	33.5	34.25	17.5	15.5	25.75	32.75
61	31.5	32.5	16.5	15.75	25.75	32
61.3333	31.5	32.25	16.75	15.5	25	31
61.6667	29.5	30.25	16.75	14.5	24	30.5
62	28.25	29	15.5	13.75	23	29
62.3333	27.75	28.5	15.5	13.75	23	29.25
62.6667	26.75	26.75	14.5	14.25	21	28.25
63	26	26	14	12.75	21	27.5
63.3333	26	26	15	13	21.25	27.75
63.6667	25	25	14.5	13	20.5	27
64	24.25	23.75	13.5	11.25	19.75	26.25
64.3333	24.25	23.75	13.75	12.25	20	27
64.6667	23.25	22.5	12.75	11.5	19	25.5
65	22.5	21.75	12.75	11	18.5	25
65.3333	22.75	22	12.75	11.75	19	25.75
65.6667	22.5	22	12.75	11.25	19.5	25.75
66	22	21.25	13	11.75	19	26
66.3333	22.75	21	13.25	11.25	18.25	25.25
66.6667	21.75	21.25	12.5	10.25	18	24.75
67	22	21	13.5	11.25	18.5	25.25
67.3333	22.25	20.75	13	11.25	18.75	25.5
67.6667	22.25	20.5	13	10.75	18.25	25.5
68	22	20.25	13	11	18.75	25.25
68.3333	21	20	11.75	10.25	18	24.5
68.6667	22	20.75	12.75	12	19.25	25.5
69	22	20.75	13.25	10.75	18	24.5
69.3333	22	20.5	12.75	11	18.5	25
69.6667	22.25	21	13	11.5	18.75	25.25
70	22.5	20.75	15.25	11.5	19.5	25
70.3333	22.25	20.75	13	11.5	19.5	25.25
70.6667	24	21	13	12	20	25.5
71	22.5	20.5	13	11.5	19.5	25
71.3333	22.75	21.5	14	11	20	25
71.6667	22.5	21	13.25	12	20	25.75
72	23.75	22.5	14	12.25	21	25.75
72.3333	23.5	21.5	13.75	12	21.75	25.5
72.6667	24.25	22.25	14.75	12	20.25	25.75
73	24	22.25	14.25	12	21.25	25.75
73.3333	24.25	22.75	14.25	13	22	26.25
73.6667	23.75	22.5	13.75	12.25	21.25	25.75
74	24.25	23	14.25	12.25	21.75	26
74.3333	24.75	23.25	13.75	13.25	24	26.5
74.6667	25.25	24	14.5	14	23.75	27
75	25	24.25	14.75	13	22.75	25.75
75.3333	26	24.5	14.75	13.25	23.5	26.5
75.6667	26.5	25.25	15	14	24	26.75
76	27	25.75	15.5	13.25	23.5	25.75
76.3333	25.75	25	14.75	14.5	25	27
76.6667	27.75	26.75	15.75	14	24	26
77	27.25	26.5	15	14.25	24.75	26
77.3333	27	26.5	15	14.75	24.75	26
77.6667	27.75	27.25	16	14.5	24.75	26.25
78	28.5	28.25	16	14.75	25.5	26
78.3333	28	28	15.75	15.25	25.75	26.5
78.6667	28.25	28	15.75	15.25	25.75	26.25
79	29	29	16	15.5	26.5	26.25
79.3333	28.75	29.25	16	15.75	26.5	26
79.6667	28.25	28.75	15.5	15.25	26	25.75
80	29.5	29	16	16	27	26.25
80.3333	29.75	30.25	16.5	16.25	28	26.5
80.6667	29.75	30	16	16.75	28	26
81	29	30	15.5	16.5	27.5	26
81.3333	28.25	29.25	15	16	28	26
81.6667	28.75	29.5	15.75	16.25	27.25	25.25
82	29.25	29.5	15.75	16.25	26.75	25
82.3333	29.5	30	16	16.25	27	25.5
82.6667	29.25	30.5	16.25	16	26.25	24.5
83	29.5	29.75	16.25	16.25	26.25	24.25
83.3333	28.75	30.25	15.75	16.75	27	25.5
83.6667	28.5	29.75	15.5	16.75	26.75	25
84	27.5	28.5	14.75	16.5	27	25
84.3333	27.5	29	14.75	16	25.5	23.75
84.6667	27.75	29.25	15.25	16.5	26	24
85	28.25	29.25	16	16.25	25.25	23.5
85.3333	27	28.75	15	16	25.25	23.75
85.6667	27	28.5	14.75	16.25	25.25	23.75
86	26.75	28.25	15.25	16	24.5	23.5
86.3333	26	27.5	14	15.5	24	23
86.6667	26.25	27.75	14.5	16	25.25	23.25
87	26.25	27.75	14.75	15	24	22.5
87.3333	25.25	27.25	14	15.5	23.75	22.75
87.6667	25	27	13.75	15.25	23.75	22.25
88	25.25	26.75	20.25	15	23.75	22
88.3333	25	26	15.75	15.25	23.5	22.25
88.6667	24.25	26	13.75	14.75	23	21.75
89	24	25.75	13.5	15.25	22.5	21.25
89.3333	24.25	25.75	13.75	15	22.75	22
89.6667	24.75	26.5	14.25	14	22	20.5
90	23.25	24.75	13.25	14	21.75	21
90.3333	23	25	13	14	22	21
90.6667	22.75	24.25	13	14	21.5	20.5
91	23.25	24.75	13.25	14.25	22	20.75
91.3333	22.5	24	12.75	15	21.75	21
91.6667	23.25	24.75	13.5	13.75	20.5	20
92	22.25	24	13	13.75	21	20.25
92.3333	21.5	23.5	12	14.25	21.25	20.25
92.6667	22.25	24.25	13.25	14.75	21	20.25
93	21.5	23.5	12	13.25	20.75	19.5
93.3333	21.75	23.5	13	13.75	22.25	19
93.6667	21.5	22.75	11.75	13.25	20	19.75
94	21.25	23.25	13	14	20	19.5
94.3333	20.75	22.75	12.25	13.75	20.25	19.5
94.6667	20.75	22	12.5	13.25	19.25	19.25
95	19.5	21.5	11.5	13	19	18.25
95.3333	21	21.75	12.25	13	19	18.5
95.6667	20.5	22	12.25	12.75	18.25	18.25
96	20	21.5	12	13.25	19.25	18.75
96.3333	20.5	21.5	12.25	12.75	29.75	18.25
96.6667	21.75	20.75	11.25	12.5	18.5	18
97	19.75	21.25	11.75	13.25	19.25	18.5
97.3333	20	20.75	11.5	13.25	19	18.5
97.6667	20.5	21.25	12	13	18.5	17.75
98	20.75	21.5	11.5	13	19.75	18.75
98.3333	20.25	21.5	12.25	13.25	19.25	18.25
98.6667	20.75	21.75	11.25	13	19.75	18.75
99	21	21.5	11.5	13.5	19.75	18.5
99.3333	21.25	21.75	11.75	13.75	20.25	18.75
99.6667	13.5	14.25	3.5	13.25	20	18.75
100	21.75	21.75	11.25	14.25	21	19.25
100.333	20.75	22.75	12	13.5	20.5	18.5
100.667	22.25	22.75	12.25	14	20.75	19.25
101	21.5	22.25	12.25	14.5	21.25	19.25
101.333	22.5	23.25	12.25	14.5	22	19
101.667	22.75	23.75	12.25	12.75	20	17.25
102	22.5	23.5	11.75	14.75	21.25	18.75
102.333	23.75	23.75	12	13.75	20.75	18.5
102.667	23	24	12.25	14.75	21.75	19.25
103	22.75	25.5	11.75	14.25	22	19.25
103.333	23.75	25.25	12.75	15.75	23.25	19.75
103.667	24.25	25	11.75	15	22.75	19.75
104	24.25	25.75	12.25	15.25	23.25	20
104.333	23.75	25.25	12.5	15	23.25	19.75
104.667	25	26.5	12.75	28.75	23	19.75
105	24	25.5	12	15.75	23.5	20
105.333	25	26.25	12.5	15.5	24.25	20.25
105.667	25	26.75	12.75	15	23.5	19.75
106	24.25	26.25	12.5	15.75	23.5	19.75
106.333	25.25	27	12.75	15	23.75	20
106.667	24.75	26.75	12.25	16.25	24.5	20.5
107	25	27	12.5	17	24.5	20.5
107.333	25	26.5	13	15.25	23.75	20
107.667	24.75	26.5	12.75	15.5	24	20
108	24.25	25.75	12	15.5	24.25	20
108.333	24.5	27	12.25	16	24	20
108.667	24	26.5	12.75	16	23.75	20
109	23.75	26	12.25	16	24.25	20
109.333	24.5	26.75	12.5	16	24.25	20.75
109.667	24	26.25	12.25	15.75	24	20
110	24.25	26.5	12.25	14.75	23.25	19.25
110.333	23.5	26	12.5	15	23.25	23.5
110.667	23.75	25.5	11.75	15.75	23.5	19.75
111	23.5	25.75	11.5	15.25	23.25	19.25
111.333	23.75	26	12.25	15.5	23.5	19.75
111.667	23.5	26	12.25	15.5	23.75	20
112	23.5	26.5	12.5	15	23	18.75
112.333	24.5	25.75	12.25	15.5	23.25	19.75
112.667	22.75	24.75	11.5	15.75	22.75	19
113	22.75	25.25	11.5	15	22.75	18.75
113.333	22.75	24.75	11.25	14.5	22.25	19
113.667	23	25.25	11.5	15.25	22.75	19.5
114	22.25	24.5	11.25	14.75	23	18.5
114.333	22	24.25	11	15.5	23	19.25
114.667	22.5	25	11.5	15.25	22.5	18.25
115	22.75	25	11.75	15	22.25	19.5
115.333	22.25	24	10.75	14.75	22.5	18.25
115.667	21.75	24	11	14.25	22	18.5
116	21.75	24	11.25	14.25	22.25	18.25
116.333	22	24	11	14.5	22.25	18.25
116.667	21.25	23.5	10.75	16.25	21.25	18
117	22	24	11.25	14	21.75	17.5
117.333	21.75	24	11.25	14.25	22	18.25
117.667	21.5	23.25	10.75	13.75	21.75	17.75
118	20.75	22.75	10.25	13.75	21.25	17.75
118.333	20.75	22.25	10.5	14	21.25	17.75
118.667	20.75	21.5	10.5	14	21	17.25
119	20.75	21.5	10.75	14	20.75	17.5
119.333	20	21.5	10.25	13.25	20.25	17.25
119.667	19.75	21.5	10.25	13.75	20.5	17.5
120	19.75	20.75	10.5	12.75	19.25	16.25
120.333	19.5	20.75	10.25	14	20	17
120.667	19	20.25	9.5	12.5	19.25	16
121	20	20.5	10.25	13.25	20.25	17
121.333	19.75	20.25	10.25	13.25	19.75	16.75
121.667	19.5	20.25	10.25	12.75	19.75	16.75
122	17.25	17.75	7.75	13	19.75	16.5
122.333	19	20.25	9.75	13	20.25	17
122.667	19.75	20.25	10.25	13.5	20.25	16.75
123	19.25	19.5	10.25	12.75	19.5	16.5
123.333	20	20	10	13.75	20	16.75
123.667	17.75	18.25	9.25	12.25	19.25	16
124	18.75	19.25	9.25	12.25	19.5	15.75
124.333	19.25	19.75	9.75	13	19.75	15.75
124.667	20	19.75	10.25	13.25	20.25	16.25
125	19.75	19.5	10	13	20.25	16.5
125.333	19.75	20	9.75	12.5	19.75	15.75
125.667	19.5	19.25	9.75	13.5	21	16.5
126	20.75	20.25	11.25	12.75	19.75	15.5
126.333	20	19.5	10	12.75	20.25	16.5
126.667	19.5	20.25	10	13	20.5	16
127	20.25	20.25	10	13	21.25	23.75
127.333	21	20.75	9.75	13	21.5	16.25
127.667	21.5	21.25	10.5	13.75	22.25	17
128	21.25	21.25	10.25	14	23	17.75
128.333	22.75	22.25	10.75	14	23.25	17.75
128.667	22.75	21.75	10.75	14	23.25	17.5
129	22.5	22.25	10.75	14	23	17.25
129.333	23.5	23.75	11.25	15	24.5	18
129.667	23.25	23	11	14.25	24.5	17.75
130	24.5	24	11.5	15.5	24.75	19.5
130.333	24.25	24.5	12	15.75	25.25	19
130.667	24.5	24.5	11.75	15.25	25.75	19
131	24.75	24.5	11.75	15.5	25.5	19
131.333	24.25	24.5	11.75	15	25.5	19.25
131.667	24.5	24.5	12	15	25	18.75
132	25.25	25.25	12.5	15.5	25.75	19.5
132.333	25.5	25.5	12.5	16	27	19.75
132.667	25.5	25.5	12.75	16.25	26.25	20.25
133	24.75	25	12.25	15.25	25.5	18.75
133.333	26	26.25	13	15.75	26	19.5
133.667	26	26	13	16	25.75	19.75
134	25.5	26	12.75	16.25	26.75	19.5
134.333	26	25.5	13	16.25	26.5	20
134.667	26	26.75	13.5	17	26.5	20.25
135	26.5	26.25	13.5	15.75	25.75	19.25
135.333	26.25	26	13.5	15.75	26.25	19.5
135.667	25.25	25.75	12.5	16	26	20.25
136	26	26.75	13.75	17	27	20.5
136.333	26.5	26.25	13.5	16.5	26.5	21.5
136.667	25.25	25.5	13.25	15.75	26.25	20
137	25.75	26.25	13.5	16	26.25	20
137.333	26	26.5	13.75	16.75	26.75	20.75
137.667	26	26.75	13.25	16	26.5	20.5
138	25.5	25.75	13.25	16.75	26.75	20.75
138.333	25.75	26.5	14	16.5	26.5	21
138.667	25.25	26.5	13.75	16	26	20
139	26.25	26.75	14.5	15.75	26.25	20.25
139.333	26.25	27.25	14.5	15.75	26	20.25
139.667	24.25	25	12.25	15.75	26	20.25
140	25.25	26.5	13.75	16	26.5	20.25
140.333	25.25	26	14.25	16.25	28	20.5
140.667	25.5	26.5	14.5	16.25	26.25	21
141	25.5	26.5	14.25	16.25	26.25	21
141.333	24.75	25.75	14.5	16	25.75	21
141.667	24.5	25	14	16.5	25.75	21
142	25	25.75	14.5	15	24.75	19.75
142.333	25	25.75	14.75	16	25.25	20.5
142.667	24.25	24.25	13.75	14.75	24.5	19.5
143	24.25	24.5	14	15.25	25	20.5
143.333	24	24	14	15.25	24	19.5
143.667	23.5	24	13.25	14.75	24.5	19.75
144	24.25	24.5	14.25	15	24	19.75
144.333	23.75	24.5	14.25	14	23.5	19.25
144.667	23.5	23.5	13.75	14.25	23.5	19.25
145	23.5	23.75	13.75	14.75	24.25	19.5
145.333	24.25	25	14.5	14.75	24.25	19.5
145.667	19.5	19.25	9.25	14.25	23.75	19.5
146	23.25	22.75	13.25	14	23.75	19
146.333	23.5	23.25	13.5	14	23.75	19
146.667	25.25	23.75	14.25	14	23.5	18.25
147	23.5	22.5	14	14	23.5	19
147.333	24	23.25	14.25	14.5	24.25	19.25
147.667	23.75	23.25	14	14	24.25	19.5
148	24	22.75	14.25	14.25	24	19.25
148.333	24	23.25	14.25	13.75	26.5	19
148.667	24.5	23.5	14.25	15.25	24	19.25
149	24	23.25	13.5	13.5	23.75	18.75
149.333	25.5	24.5	14.75	13.75	23.5	18.75
149.667	25.25	24.5	14.75	14.75	25	20
150	25.25	23.75	14.25	14.75	24	19
150.333	26.75	24.75	15	15.25	25.25	19.75
150.667	26.25	24.75	14.5	14.75	25.25	19.75
151	26	24.75	14.75	14.5	25.75	19.5
151.333	27	25.75	15.25	15	26.25	20.5
151.667	27.5	25.75	15.5	14.75	26.5	21.5
152	27.5	26	15.75	15	26.75	21.25
152.333	28	25.25	15.5	15.5	26.75	21
152.667	28.25	26.75	16	15	26.5	21
153	28	26.5	16	15.5	27.5	21.25
153.333	28	26.75	16	15.75	27.5	21
153.667	28.75	27	16	16	28.75	21.5
154	28.75	27	16.25	15.75	28	21.5
154.333	29.5	27	16.25	16.5	28.75	21.75
154.667	28.75	27	16	16.25	28.5	21.75
155	29.5	27.25	16.5	16.5	29.75	22.75
155.333	30	28	17.5	17	30	22.75
155.667	29.75	27.75	16.5	17.5	29.75	23
156	29.5	28	16.25	16.75	29.5	22.5
156.333	30	28.25	17	17.25	30.5	23.5
156.667	30.75	28.75	17.75	16.25	29.75	23
157	31	28.5	17.25	16.75	30.25	23.25
157.333	31.25	28.5	17.75	17.25	30.25	23.25
157.667	31.5	29.25	18.25	16.5	29.5	23
158	31.25	28.75	18	17.25	30.5	23.75
158.333	31	28.5	17.5	16.5	29.5	23.25
158.667	31	29.5	17.75	17.25	30.25	23.25
159	32	29	18	16.75	30.25	23.25
159.333	31.25	28.5	18.25	16.75	30.25	23.75
159.667	30.75	28.75	17.75	11	24	17.75
160	31	28	18.25	4.5	18.75	11.5
160.333	32	28.75	19.5	17.5	31	27.25
160.667	32	28.75	19.5	16.5	30	23.5
161	31.75	28	19	16.75	30.25	23.75
161.333	32.25	28.75	19.25	16.5	31	23.75
161.667	31.75	28.25	19.5	16.75	30	26.25
162	32.25	28.5	20	16	30.25	23.75
162.333	32.25	28.25	20	17.5	31	24
162.667	32.5	28.5	20	17	30.75	24.25
163	32.25	28.75	20	17.25	31	24.25
163.333	31.25	26.75	18.75	16.5	30.5	23.75
163.667	32.75	28.75	21.25	16.75	30.25	23.5
164	32	27.75	20.25	17	30.75	24.25
164.333	33	28.5	21.25	16.75	30.5	23.75
164.667	32	27.75	20.25	16.75	30.25	23.5
165	31.75	27.25	20.25	16.5	30.5	23.75
165.333	32	27.5	20.5	17.25	30.5	24
165.667	32.25	29.75	20.5	16.75	31	23.75
166	32.25	27.75	21.25	16.25	29.5	23
166.333	31.5	26.25	19.75	17.25	30.25	23.75
166.667	31.5	26.5	20.5	16.5	29.25	23.25
167	31	25.75	20	16	28.5	22.75
167.333	31.5	26.25	20.75	16.25	29	22.5
167.667	31.5	25.75	19.75	16.25	28.25	22.5
168	31.5	25.75	19.75	16.25	28.25	22.5

## Sheet: Figure 2 C (GYEC+PEAS CBOX 4C)
Time	cbox::oluc
0	7.5	-28.6667	-24.6667	16	4	-10.3333
0.333	45	11.6667	14	52.3333	49	31.6667
0.667	70	29.6667	27.3333	73.6667	82.5	46.6667
1	79	36.3333	31.6667	79	106	58.6667
1.333	81.5	36.3333	40.3333	90.3333	93.5	58.6667
1.667	86.5	39	47	106	104.5	67.6667
2	90.5	43	55.3333	115.333	115	76.3333
2.333	94.5	43.6667	58.6667	119	120.5	82.3333
2.667	97	48.3333	62.6667	119.333	122.5	86.6667
3	107.5	52.6667	68.3333	114.667	117	85
3.333	117	61	75.3333	107.667	114.5	80
3.667	130.5	71	84	99	116	76.6667
4	147	81.3333	94.6667	92	120.5	74.3333
4.333	158.5	90	106	86.3333	123.5	73.3333
4.667	174.5	99	116.667	82.6667	129	72.3333
5	186.5	108.667	125.667	80.6667	138	72.6667
5.333	199	117.667	134	80.6667	146	73.3333
5.667	211	125	141	81.6667	154.5	77.3333
6	218.5	128	140.667	82	161	78.6667
6.333	215	127.667	139	82	161.5	80.6667
6.667	209.5	126	135	82	159.5	81
7	202.5	123.333	131.667	79.6667	152.5	78.6667
7.333	202	121.667	128.667	77.6667	145.5	76
7.667	203	121	128	76.6667	137.5	76
8	200	119.333	126.667	73.6667	130.5	73
8.333	202	118.667	126	71.6667	123.5	72
8.667	204.5	117.667	126.667	71.6667	120	71.6667
9	205.5	118.333	127.333	70.6667	117	70.6667
9.333	205	118.333	128	70	114	70.6667
9.667	204	116.667	126.667	68	110	69
10	203.5	116	126.667	68	107.5	68.3333
10.333	202.5	114.333	125.333	67.6667	105.5	67.6667
10.667	201.5	114.333	123.667	67.6667	105	67
11	197.5	113.667	121.333	67	101	66.3333
11.333	196	111.333	119.667	67	99	66
11.667	192	109.333	115.667	66	96.5	64
12	188	107	112.667	65.3333	93	63
12.333	183.5	103.667	109.333	64.6667	91.5	62
12.667	180.5	101.667	106.333	64.3333	89	61
13	176	99.6667	104	64.3333	86.5	60.6667
13.333	169.5	97.3333	100.667	62.6667	84	58.6667
13.667	167.5	95.3333	98.6667	64.3333	83.5	58.3333
14	163.5	91.6667	95.3333	63	81	57.3333
14.333	160	91.3333	93	61.6667	80	57.6667
14.667	156	88.3333	90.3333	62	78	56
15	152.5	87	89.6667	62	77.5	55
15.333	148.5	85.3333	86.3333	60	74.5	53.3333
15.667	147	84.6667	85	60	73.5	54
16	144	83	83.6667	59.3333	72	52.3333
16.333	141.5	80.6667	82	58.3333	71	52
16.667	140.5	80	81	57.3333	70	50.6667
17	138.5	80.3333	80.3333	58	69	50.3333
17.333	136	79.6667	79.6667	57	67	50.3333
17.667	137	78.6667	80	57.6667	67	49.3333
18	134.5	78.3333	79	57	65.5	48.6667
18.333	135	78.6667	80.3333	58	66.5	50.3333
18.667	134.5	79	80.3333	57	65	49.3333
19	135	79.6667	79.3333	57.3333	64.5	49.6667
19.333	133.5	78.6667	79.6667	56.6667	64	48.3333
19.667	134	79	81	56	63.5	49
20	134.5	79.3333	81.6667	56.6667	69	48.6667
20.333	134	80.6667	81.3333	57	62.5	49.3333
20.667	136.5	82.3333	83.6667	57	61.5	49.3333
21	137.5	82.6667	84.6667	57.3333	62	49
21.333	138.5	83.6667	85	57.3333	62	49.3333
21.667	140	85.3333	86.3333	58	62	50
22	141	85.6667	86.6667	58.6667	62.5	50.6667
22.333	143.5	89.3333	90.3333	60	62.5	52.3333
22.667	144.5	89	90.3333	62	62	51.3333
23	147	92	92.6667	60.3333	63	53.6667
23.333	147.5	91.6667	92.6667	60.3333	63	51.6667
23.667	150.5	95	94.6667	61.6667	63	54.3333
24	152	97.3333	97	62.6667	63.5	54.3333
24.333	153.5	99	99	62.3333	65	55.3333
24.667	157	100	99.3333	64	65	55.6667
25	159.5	103	102.333	64.3333	65	56.6667
25.333	162.5	105	104	65	66.5	58
25.667	165.5	108	105.333	66.3333	65.5	57.6667
26	169	111.667	108.667	67.3333	67	61
26.333	173.5	114.667	112	69	68.5	61.3333
26.667	176	116	114	70	67.5	62
27	181	121.333	118.333	72.3333	70	64
27.333	186.5	125	120.667	74	71.5	65.6667
27.667	188	126.333	123	73.6667	70	65.3333
28	193	130.667	125.333	75.6667	72	67.3333
28.333	197.5	134.333	128.333	76.6667	73.5	69
28.667	201	136.667	131.333	77	73.5	69.3333
29	204.5	140.667	134.333	79.6667	74	71.3333
29.333	207.5	143.333	137.667	80	74.5	72.6667
29.667	213.5	146	140.333	82.3333	75.5	74
30	216	149.667	142.333	83.6667	75.5	75.3333
30.333	218.5	152.667	143.333	85	77	75.3333
30.667	222.5	155	146.667	86.3333	77	77.3333
31	226	159	149.333	88.3333	78	79
31.333	228.5	161.667	150.667	89	78	80
31.667	233.5	164	152.667	89.3333	79	81
32	235.5	166.667	155	91	79	82.3333
32.333	238.5	170.333	158	92.6667	80	83
32.667	241.5	172.333	159	93.6667	80	83.3333
33	245	175.667	161.667	97.3333	82	86.3333
33.333	247.5	177.333	164	97	81.5	85.6667
33.667	252	200.333	165.333	99	83.5	87.6667
34	251.5	181.667	166	99	83.5	87.6667
34.333	254	182.333	167.667	100.667	83.5	89.3333
34.667	256	184.667	168	101.667	84.5	89.3333
35	258	186	168.667	102.333	84	89.6667
35.333	258.5	187.333	171.667	103	86.5	91
35.667	259.5	189.333	169.667	103.667	85	91.6667
36	260.5	190	170.667	104	86.5	92.3333
36.333	261	192	171	105.667	86.5	92
36.667	260	191	170.333	105.333	85.5	93
37	258.5	190.667	168	105.333	87	92.3333
37.333	258.5	191.333	168	106	87	93.6667
37.6667	254	186.333	163.333	103.333	83.5	89.3333
38	255.5	190	165.667	107	87.5	93.6667
38.3333	253	187.667	163.667	106.333	87	92.6667
38.6667	251	187.333	162.667	107	87.5	93.3333
39	249	185.667	161	106	87.5	93
39.3333	245	183	159	106	86.5	92
39.6667	245	183.333	157	106	88	91.6667
40	239.5	180.333	155.667	106	87	91.6667
40.3333	235.5	180	154	105.333	87.5	91
40.6667	235.5	178.667	153	106.333	87	91.3333
41	232.5	174.667	149	104	86	89.6667
41.3333	229	173.667	148.333	105.333	86.5	90.3333
41.6667	226.5	172	147	104	87	89.6667
42	224	171.667	144.667	106	87	90
42.3333	219.5	168.333	142	103.333	85	89.6667
42.6667	218.5	166.333	141	103.667	85.5	88
43	216	166	139	104	85.5	89
43.3333	212	161.667	136	101.667	84.5	87
43.6667	211	161.333	135.667	103.333	86.5	89
44	208	160.667	134	102.333	85	88
44.3333	203.5	158.667	130.333	101	85	85.6667
44.6667	202.5	156.667	130	101.333	86	87.6667
45	200	154.667	128.667	100.667	84	86
45.3333	198	153.333	126.667	99	84	86.3333
45.6667	196	151.333	124	99	84.5	86.3333
46	193.5	150.667	124	99.3333	84.5	86.3333
46.3333	191.5	149.333	121	98	85	86.3333
46.6667	190.5	148	120.667	98.6667	85	85
47	188	147.667	119	97.3333	85	85.6667
47.3333	186	146.333	117.333	96.3333	84	85
47.6667	184.5	144	116	96	85	84.6667
48	184	144	115	95	84.5	85
48.3333	182	142.667	114	94	85	84.3333
48.6667	181.5	142.333	114.667	94.6667	86.5	86
49	181	143	113.667	94.3333	86	87
49.3333	179	141.667	112	93.3333	86	86.3333
49.6667	178.5	141.667	113.333	94.3333	86	86.3333
50	178	142.333	112	93	86	87
50.3333	177.5	141.333	111.333	92.3333	87	86.6667
50.6667	178	142	111.667	92	86.5	87.3333
51	179	143	111.667	92.6667	87.5	87.6667
51.3333	179.5	144.667	112.333	93	89	89
51.6667	178	145	112	92.3333	89.5	89
52	180.5	146.333	112.667	93	89.5	89.3333
52.3333	180	147.667	114.333	93.6667	90.5	90.3333
52.6667	182.5	149.667	113.333	94.3333	92.5	92.6667
53	183	150.667	114	94.3333	93.5	93
53.3333	183.5	151.667	114	93.6667	94.5	94
53.6667	183.5	152.333	115	94.6667	94.5	93.3333
54	185	153.333	115.333	94.6667	94.5	94
54.3333	185	154.667	115.667	95	95	95
54.6667	188	156	116.667	96	97	97
55	187	157	116.667	94.6667	97.5	96.6667
55.3333	187.5	159.333	117.667	95.6667	97	98
55.6667	190	159.333	118.333	96.3333	99.5	99.3333
56	188.5	161.333	118.667	96.3333	99	99
56.3333	190.5	162.667	118	96.3333	100	100.333
56.6667	192.5	164.667	125	98	102.5	101.333
57	193	165	119.667	97	102.5	101.333
57.3333	193	165.333	120.333	97	103	102
57.6667	193	165	120.333	97.6667	103.5	102.333
58	192	166.333	119	96.3333	103.5	102
58.3333	195.5	167.667	120.667	99.6667	104.5	104
58.6667	194.5	167	119	98	104	102.667
59	195	165.667	119	98	103.5	102.667
59.3333	193	166	118	97.6667	104	103.667
59.6667	194	166	119	98.6667	105.5	103
60	193	164.667	117.333	97.6667	105.5	103
60.3333	191.5	164.333	115.667	97	104.5	102.667
60.6667	191	163	115.667	96.6667	104	102.333
61	189.5	162.333	113.667	96.3333	105.5	102
61.3333	188	160.333	113	95.3333	104.5	102
61.6667	186	158.333	110.333	95	106.5	100.333
62	185	155.667	109.333	95	104.5	100.667
62.3333	183.5	154.333	107	93.6667	104.5	100
62.6667	182.5	152.333	106	93.6667	103	99
63	180.5	149.667	103	92	103	98
63.3333	176.5	146	100.667	90.3333	100.5	96.6667
63.6667	175	144.333	99.6667	90.6667	100.5	95.3333
64	174	142	98.3333	90	100	95.6667
64.3333	171	139.667	96.3333	89	99.5	95
64.6667	168.5	135.667	93.3333	87.3333	99	93
65	166.5	134.333	92.3333	86.6667	98	92.6667
65.3333	164.5	131	90	86	97.5	90.6667
65.6667	161	128	88	86	96.5	89.6667
66	159	125.333	86	85	95.5	88.3333
66.3333	156.5	121.333	82.6667	82.6667	93.5	87
66.6667	155	120.333	82.6667	83.6667	94	86.3333
67	151.5	116.333	91.6667	82	93	84.6667
67.3333	150	115	78.3333	81	92.5	85
67.6667	148	112	75.3333	79.6667	92	83.3333
68	145	109.667	73.6667	78.6667	91.5	82.3333
68.3333	141.5	106.333	72	77.3333	89	79.6667
68.6667	140.5	104	71	76	90	79.6667
69	139	102.667	69.6667	77.3333	88	80
69.3333	137	99.6667	67	75.6667	88.5	78.3333
69.6667	134.5	97.3333	66.3333	74.6667	87.5	77.6667
70	132.5	96	64.6667	73.6667	87	76.3333
70.3333	131.5	95	64	74	87.5	76
70.6667	128.5	92	61.6667	72	85.5	74.6667
71	127.5	90.3333	61.3333	72.3333	86.5	73.6667
71.3333	125.5	89	59.6667	71	84.5	74
71.6667	123.5	87	58	70	85	72.3333
72	122	87	57.3333	71	84.5	73
72.3333	120.5	85	57.6667	69.6667	84	73
72.6667	119	83.6667	56.3333	69.3333	82.5	72
73	118.5	82.6667	54.6667	69	82.5	71
73.3333	117.5	81.3333	54.3333	67.6667	82	70.3333
73.6667	117	81.6667	54	68.3333	82.5	71.6667
74	115	80.3333	53	67.3333	82	70.6667
74.3333	114.5	80.6667	53.3333	68.3333	83	71
74.6667	114	80.3333	52.6667	67.6667	83	70.6667
75	113.5	79.3333	53	67	82.5	70.3333
75.3333	113.5	80	52.6667	67.3333	82.5	71
75.6667	112.5	78.6667	52	67	82	70.3333
76	114	80	51.6667	66.6667	82.5	71.3333
76.3333	114	79.6667	52.3333	67.6667	83	71.6667
76.6667	115	80.3333	52	67	82.5	72.3333
77	113	79.3333	51.6667	67	82.5	72.3333
77.3333	114	80.3333	53	68.3333	83	72.6667
77.6667	114.5	80.6667	52.6667	68.3333	83.5	72.3333
78	115	81.6667	53	68	83	73.6667
78.3333	115	82	53.3333	67.6667	84	73.6667
78.6667	115	83.6667	54	75.6667	84	74.6667
79	115.5	83	53.6667	68	84	73.6667
79.3333	115.5	83	53.3333	67.6667	83.5	73.6667
79.6667	117.5	85.3333	55	69.3333	85.5	76
80	118.5	86.3333	54.6667	69	84.5	76
80.3333	119	87	56.3333	70.3333	85.5	76.6667
80.6667	118	94	56.6667	70	86	77.6667
81	120.5	88.6667	57	69.3333	86	77.6667
81.3333	120	88.6667	57.3333	69.6667	85.5	77.3333
81.6667	120.5	91	58.3333	71	86.5	78.6667
82	122.5	91.6667	59.3333	71	87.5	79.3333
82.3333	122.5	91.6667	59.3333	71	88	80
82.6667	123.5	93.3333	59.6667	71	87.5	79.3333
83	124	93.6667	60.3333	71	87.5	79.6667
83.3333	125	94	60	71	86	80
83.6667	125	94.3333	60.3333	71	88.5	80.6667
84	125.5	95.3333	60.3333	71.3333	88	80.6667
84.3333	124.5	94.6667	60.3333	70	87	80
84.6667	125.5	94.6667	61	70	87	80
85	125.5	94.3333	60.6667	69.6667	87.5	79.6667
85.3333	124.5	94.6667	60.3333	69	87.5	78.6667
85.6667	123.5	94	59.3333	68.3333	85.5	79
86	122.5	94.3333	59	68.6667	85.5	78
86.3333	123	94.3333	60.3333	69	85	77.6667
86.6667	123	94.3333	58.6667	68.6667	84.5	77
87	121	91	57	67.3333	83	75.3333
87.3333	120	91	57	66.6667	83	75.3333
87.6667	118.5	89.6667	55.6667	66.6667	82.5	74.3333
88	117	89	55.3333	66.3333	82.5	73.6667
88.3333	116.5	88	55.3333	65.3333	82	72.6667
88.6667	115	86.3333	53.6667	65.3333	81.5	72
89	113	85.3333	51.6667	62.3333	79.5	70
89.3333	111	83	50.3333	61.3333	78.5	68.6667
89.6667	110.5	81.3333	50	62	77.5	69
90	110	80.3333	49	62	77.5	67.6667
90.3333	109	79.6667	49.3333	60.6667	77	67
90.6667	106	78.3333	47.6667	60.3333	75.5	65
91	105	76.6667	45.3333	59.3333	76	64.6667
91.3333	104	75	46	58.3333	74	63.6667
91.6667	101.5	74	45.3333	57.6667	73.5	62.3333
92	100.5	70.3333	43.3333	55.6667	71.5	60.6667
92.3333	99.5	70.3333	43	56.6667	72.5	60
92.6667	98.5	69	41.6667	54.6667	71	59.3333
93	96.5	66.6667	39.3333	54.3333	69.5	57
93.3333	96	66.6667	40.3333	54.6667	69	56.6667
93.6667	93.5	64.6667	38.3333	52.6667	68	54.6667
94	93.5	64.3333	38	53	68	55.3333
94.3333	90.5	61.6667	36	51	67	53.3333
94.6667	91.5	62	36.6667	52.6667	67	54
95	90.5	59.6667	35.3333	50.6667	65	52.3333
95.3333	88.5	59.3333	34.6667	49.3333	65	51.3333
95.6667	87.5	57	33.6667	49.3333	64	49.6667
96	85.5	56.3333	33	49	64	49.3333
96.3333	84.5	56	32.3333	48.3333	63.5	48.6667
96.6667	84.5	54.6667	32.3333	48	62.5	48
97	82.5	55.3333	32.6667	48.3333	63.5	49
97.3333	81.5	53	30.3333	46.3333	60.5	46.6667
97.6667	82.5	52.6667	31.3333	46.6667	61.5	47.3333
98	81	52.6667	30.3333	47	61	46.6667
98.3333	81	51	30	46.3333	60.5	46
98.6667	80.5	50.3333	30	45.6667	60	46.3333
99	79.5	50	29.6667	45.3333	60	45
99.3333	80	50.3333	30.3333	45.6667	60.5	45.6667
99.6667	79	50	29.6667	45	60	44.6667
100	80	50.3333	29.6667	45.3333	60	45.3333
100.333	79.5	50.3333	30.3333	45.3333	61	45
100.667	81	50.3333	30.3333	45.3333	60	45
101	80.5	50.6667	30	46	61	45.6667
101.333	80	50.3333	29.6667	44.6667	60	45.3333
101.667	81.5	51.6667	31.6667	46.3333	61.5	46.3333
102	81.5	51.6667	31.3333	45.6667	61	45.3333
102.333	82.5	52.3333	32.3333	46	61.5	45.6667
102.667	83	53	32.3333	45	60.5	46
103	83	54	32.3333	45.6667	61.5	47.3333
103.333	84.5	53.3333	33	46	60	47.6667
103.667	85	54	33.3333	45	61	47.6667
104	85.5	55.6667	34	47	62	49.3333
104.333	86	55.6667	35	47	62	49
104.667	87	57.3333	35.3333	46.6667	62.5	49.3333
105	87	57.3333	34.3333	46	62	49
105.333	91	58.6667	36.3333	46.3333	63	50.3333
105.667	88.5	59.6667	37.3333	47.3333	63.5	50.6667
106	88	60	36.3333	47.6667	62.5	50.3333
106.333	91	61	37.6667	49	64.5	51.3333
106.667	91.5	61.3333	38.3333	48	64.5	51.3333
107	93.5	62.6667	40.3333	48.6667	64.5	53.6667
107.333	91	62	37.6667	48	63	52.3333
107.667	92	63.3333	39	48.3333	63.5	53
108	92	63.6667	39.6667	48.3333	64.5	53.3333
108.333	94	65	39.3333	48.6667	64.5	67
108.667	93.5	63.3333	39.3333	47	64	53
109	92.5	65	39.3333	48.6667	63	53.3333
109.333	93	65	39.6667	48.3333	63	53.3333
109.667	92.5	64.3333	39.6667	48	63	52.6667
110	92.5	64.3333	39	48	62.5	53
110.333	92.5	64.6667	39	48.3333	63	52.6667
110.667	92	64	39	47.6667	62	53
111	91	64.3333	38.6667	47.3333	62	52
111.333	91	63.6667	38	47.3333	61.5	51.3333
111.667	90.5	63.3333	38	47.6667	62	51.6667
112	88.5	61.6667	36.3333	45.6667	60	49
112.333	88.5	62	36	46.6667	60	50.3333
112.667	87	60	35	45.6667	59	49.6667
113	87	59.3333	34.6667	45.6667	60	48.6667
113.333	85	58.3333	34	44.6667	57.5	47
113.667	86	57.3333	33	44.3333	57	46.3333
114	84	56.6667	33.3333	44	57.5	46.6667
114.333	82.5	55.3333	32	43.6667	56.5	45.6667
114.667	81.5	55	31.6667	43.6667	56.5	45
115	81	53.3333	30.3333	42.6667	55.5	43.6667
115.333	80.5	52.3333	28.6667	42	54.5	43.3333
115.667	79.5	51.6667	29.6667	43	55.5	42.6667
116	77.5	49.6667	28.3333	41	53.5	41.6667
116.333	78.5	50.3333	28.6667	42	54.5	41
116.667	77	48.3333	26.6667	40.3333	51.5	40.3333
117	77	47	26	39.6667	51	39.3333
117.333	74.5	45.6667	25.6667	39	51.5	38
117.667	73.5	45.3333	25	39	51	37.3333
118	73.5	45	25.3333	39	50	37.6667
118.333	72	43	23.3333	37.6667	49	36
118.667	72	43	23	38.3333	49.5	36.3333
119	71	41.3333	22.6667	38.3333	48	35.6667
119.333	71	41.6667	22	38	48	34.6667
119.667	69.5	40.3333	20.6667	36.3333	46	33.6667
120	69.5	40.3333	20.6667	36.3333	46	33.6667

## Sheet: Figure 2D Oscillations
Time	WT			ncfrq::tafrq											delta-ncfrq
0	0.904905	0.804527	0.891099	0.851243	0.938303	0.912267	0.824832	0.384884	1	1	-0.03918	1	0.807998	1	0.958295
0.333	0.974883	0.894636	0.94921	0.694671	0.851641	0.804673	0.68267	0.252854	0.836246	0.942372	-0.052614	0.890334	0.617584	0.883623	0.909923
0.667	0.989809	0.905597	0.968894	0.616923	0.767054	0.686741	0.46559	0.1841	0.741194	0.772951	-0.075221	0.779079	0.496855	0.763844	0.895098
1	1	0.967484	0.999128	0.521572	0.695749	0.55746	0.321804	0.0544051	0.7036	0.713254	-0.125009	0.71428	0.349056	0.658107	0.855063
1.333	0.986069	1	1	0.406173	0.662663	0.484463	0.124906	-0.042092	0.57525	0.639836	-0.138231	0.65694	0.162072	0.520745	0.836498
1.667	0.907029	0.963598	0.954024	0.282031	0.572166	0.3418	-0.030766	-0.167599	0.481787	0.541292	-0.11198	0.585275	0.0228409	0.399197	0.774171
2	0.84081	0.928749	0.907345	0.142474	0.514469	0.161208	-0.180599	-0.305905	0.379908	0.39565	-0.081682	0.491444	-0.187478	0.277005	0.712509
2.333	0.909475	0.872115	0.841289	0.0198638	0.402728	0.0575184	-0.141667	-0.422889	0.322968	0.270121	-0.047659	0.458718	-0.312566	0.128494	0.669953
2.667	0.654945	0.764209	0.743147	-0.049679	0.428464	-0.066973	-0.163682	-0.332906	0.194102	0.143673	-0.046977	0.366627	-0.39624	0.038276	0.625877
3	0.572864	0.728498	0.636854	-0.122852	0.384878	-0.173632	-0.195079	-0.614264	0.19361	0.0529089	-0.02821	0.348015	-0.457507	-0.022329	0.526476
3.333	0.446133	0.597659	0.529697	-0.135566	0.376568	-0.236971	-0.166156	-0.682444	0.11431	-0.058016	-0.055988	0.306569	-0.477042	-0.100087	0.431331
3.667	0.327938	0.495903	0.419573	-0.05414	0.341131	-0.318196	-0.20016	-0.789097	0.155941	-0.111216	-0.115056	0.330318	-0.490139	-0.158252	0.324902
4	0.231169	0.366502	0.28883	-0.150585	0.355422	-0.392183	-0.294112	-0.821042	0.14712	-0.153915	-0.137328	0.300748	-0.521211	-0.170242	0.293922
4.333	0.137373	0.270725	0.202911	-0.087964	0.308099	-0.418971	-0.362356	-0.888275	0.104648	-0.180756	-0.123215	0.303423	-0.484982	-0.200027	0.259149
4.667	0.0655903	0.156726	0.108898	-0.133091	0.273493	-0.481739	-0.348298	-0.935644	0.0833083	-0.219538	-0.121514	0.226192	-0.434675	-0.196954	0.213422
5	-0.011791	0.111358	0.0432746	-0.110292	0.229102	-0.541096	-0.520025	-0.979891	0.0874207	-0.239705	-0.084327	0.186064	-0.475778	-0.203771	0.17037
5.333	-0.056894	0.0452982	-0.027018	-0.141953	0.172044	-0.52368	-0.500798	-1	0.0253292	-0.230154	-0.087402	0.0959632	-0.4607	-0.220826	0.154428
5.667	-0.11862	-0.062493	-0.063495	-0.139045	0.112033	-0.552631	-0.587035	-0.944864	0.0381327	-0.270146	-0.089717	0.0460426	-0.5042	-0.215341	0.10822
6	-0.15422	-0.109757	-0.090851	-0.040562	0.0927951	-0.540033	-0.586009	-0.92914	0.0025666	-0.264757	-0.106818	-0.04469	-0.471505	-0.220791	0.112286
6.333	-0.170328	-0.173001	-0.130648	-0.100219	0.0569922	-0.499787	-0.596911	-0.857296	-0.019572	-0.260554	-0.113133	-0.052113	-0.434131	-0.238087	0.0915194
6.667	-0.169122	-0.19762	-0.162159	-0.051711	0.0162483	-0.427417	-0.641445	-0.80973	-0.003371	-0.244714	-0.127146	-0.067379	-0.471447	-0.188382	0.0894548
7	-0.195805	-0.223905	-0.180124	-0.094103	-0.005102	-0.381211	-0.660958	-0.734344	-0.06327	-0.219397	-0.126236	-0.081974	-0.438855	-0.178422	0.0959462
7.333	-0.19968	-0.202195	-0.193285	-0.070468	-0.024053	-0.327974	-0.558742	-0.620674	-0.038113	-0.236843	-0.145223	-0.062144	-0.420451	-0.152784	0.0968108
7.667	-0.207563	-0.288086	-0.216457	-0.059206	-0.066381	-0.300433	-0.219923	-0.576681	-0.056987	-0.248675	-0.142822	-0.06886	-0.370717	-0.123393	0.100612
8	-0.221252	-0.272354	-0.17111	-0.139987	-0.111024	-0.289424	-0.48642	-0.562471	-0.086689	-0.258866	-0.145274	-0.072612	-0.375336	-0.132166	0.0912883
8.333	-0.234354	-0.169255	-0.21563	-0.128534	-0.109399	-0.242461	-0.495446	-0.615842	-0.160837	-0.283009	-0.163485	-0.110731	-0.418101	-0.140243	0.102099
8.667	-0.243032	-0.292277	-0.214001	-0.1848	-0.152507	-0.195135	-0.4523	-0.580365	-0.211004	-0.269611	-0.173071	-0.091628	-0.457392	-0.104929	0.109779
9	-0.220849	-0.301319	-0.236959	-0.223612	-0.162187	-0.215287	-0.497877	-0.518274	-0.211714	-0.25999	-0.174078	-0.11724	-0.473185	-0.144791	0.106886
9.333	-0.231082	-0.267941	-0.216764	-0.243438	-0.175528	-0.216432	-0.404314	-0.500698	-0.226455	-0.267902	-0.193962	-0.108253	-0.493655	-0.153351	0.101973
9.667	-0.240762	-0.324345	-0.220667	-0.236899	-0.177963	-0.200554	-0.520681	-0.499334	-0.252289	-0.307126	-0.202727	-0.090586	-0.552331	-0.151296	0.106651
10	-0.279023	-0.334766	-0.257738	-0.234339	-0.181153	-0.174263	-0.472531	-0.464921	-0.285772	-0.296552	-0.216663	-0.110574	-0.553624	-0.201342	0.113711
10.333	-0.260088	-0.326449	-0.250227	-0.273757	-0.21097	-0.190326	-0.466752	-0.437244	-0.257272	-0.344879	-0.229017	-0.074966	-0.626897	-0.213573	0.1203
10.667	-0.245508	-0.310546	-0.247222	-0.37408	-0.201281	-0.193712	-0.625865	-0.417617	-0.251867	-0.365756	-0.233781	-0.072158	-0.68656	-0.242526	0.121852
11	-0.250005	-0.342061	-0.247079	-0.353071	-0.1968	-0.097419	-0.53695	-0.398014	-0.255098	-0.422012	-0.23707	-0.141547	-0.672574	-0.254087	0.13499
11.333	-0.233213	-0.309258	-0.257622	-0.337691	-0.232879	-0.213708	-0.533153	-0.399056	-0.253616	-0.470037	-0.232038	-0.130725	-0.698605	-0.258465	0.134528
11.667	-0.270471	-0.345143	-0.251378	-0.36795	-0.231366	-0.24055	-0.552144	-0.354589	-0.273805	-0.496379	-0.244332	-0.068993	-0.673816	-0.29728	0.113298
12	-0.242724	-0.271645	-0.24689	-0.371903	-0.23614	-0.252371	-0.673098	-0.347358	-0.212312	-0.490083	-0.236684	-0.108661	-0.594918	-0.308145	0.107898
12.333	-0.267403	-0.329945	-0.259106	-0.369949	-0.205413	-0.248363	-0.494879	-0.353415	-0.262402	-0.511971	-0.237873	-0.065593	-0.663669	-0.324824	0.113701
12.667	-0.250404	-0.300132	-0.236562	-0.368731	-0.244446	-0.274215	-0.515329	-0.323072	-0.248283	-0.4799	-0.253224	-0.087744	-0.585194	-0.3061	0.11817
13	-0.246433	-0.325152	-0.242868	-0.374276	-0.228897	-0.251595	-0.542244	-0.320832	-0.217316	-0.508787	-0.236541	-0.075258	-0.631598	-0.316401	0.101174
13.333	-0.275432	-0.289647	-0.239433	-0.319562	-0.234541	-0.263336	-0.399055	-0.313926	-0.13445	-0.508956	-0.247679	-0.083886	-0.618911	-0.319359	0.11015
13.667	-0.256912	-0.274836	-0.223284	-0.31735	-0.211823	-0.246156	-0.363937	-0.28098	-0.122962	-0.482349	-0.244411	-0.118315	-0.562212	-0.344238	0.104297
14	-0.26877	-0.294109	-0.248752	-0.243084	-0.22354	-0.244805	-0.362806	-0.279805	-0.1297	-0.417525	-0.239547	-0.095215	-0.539702	-0.296651	0.102726
14.333	-0.234077	-0.316542	-0.235411	-0.230637	-0.210898	-0.211014	-0.345977	-0.267978	-0.0801	-0.396905	-0.253194	-0.117498	-0.467405	-0.308855	0.0939552
14.667	-0.240646	-0.273854	-0.214406	-0.303363	-0.17178	-0.195892	-0.293135	-0.259635	-0.100563	-0.350324	-0.24404	-0.152042	-0.458935	-0.261508	0.0848793
15	-0.213211	-0.243982	-0.209404	-0.3375	-0.171072	-0.176161	-0.312647	-0.239866	-0.096286	-0.316705	-0.243572	-0.096811	-0.38856	-0.251816	0.0627681
15.333	-0.215737	-0.267278	-0.212526	-0.328137	-0.167736	-0.13909	-0.276113	-0.240316	-0.101765	-0.266879	-0.251348	-0.121849	-0.386319	-0.214547	0.062
15.667	-0.214255	-0.247351	-0.222853	-0.257501	-0.142578	-0.115402	-0.164157	-0.222511	-0.062271	-0.214601	-0.233554	-0.066944	-0.345263	-0.186764	0.0732166
16	-0.201265	-0.260876	-0.206868	-0.249322	-0.121722	-0.091714	-0.144782	-0.20383	-0.072682	-0.138708	-0.245087	-0.100473	-0.341099	-0.166861	0.0711204
16.333	-0.189933	-0.238074	-0.200139	-0.254727	-0.125555	-0.089684	-0.09876	-0.212466	-0.001653	-0.093439	-0.250977	-0.146395	-0.303466	-0.14452	0.0972739
16.667	-0.167577	-0.222573	-0.182291	-0.255398	-0.136719	-0.082996	-0.079176	-0.185789	-0.026446	-0.060973	-0.245048	-0.15994	-0.256226	-0.100897	0.0177981
17	-0.096459	-0.176032	-0.157077	-0.134291	-0.08354	-0.060167	-0.006525	-0.137466	-0.055052	-0.082186	-0.250968	-0.128692	-0.261728	-0.080566	0.104996
17.333	-0.126045	-0.198351	-0.141901	-0.084748	-0.037318	0.0167858	0.167836	-0.109529	0.0124694	0.0319824	-0.225614	-0.091879	-0.147542	-0.026761	0.14185
17.667	-0.082297	-0.12175	-0.101735	-0.073585	-0.031252	0.0143366	0.260296	-0.067972	0.0518531	0.116653	-0.215593	-0.074211	-0.110021	0.0065164	0.133303
18	-0.044943	-0.114122	-0.075576	-0.074158	-0.057533	0.0233158	0.269246	-0.058139	0.0353042	0.126739	-0.211581	-0.011923	-0.144627	0.010446	0.132544
18.333	0.0104507	-0.055396	-0.049417	-0.086226	-0.065868	0.0551537	0.314225	-0.012695	0.107374	0.132407	-0.199308	-0.001388	-0.06339	0.0429179	0.130765
18.667	0.0363664	0.0012596	0.0015447	-0.08461	-0.094262	0.0708754	0.348926	0.0013488	0.107573	0.122807	-0.211252	0.030796	-0.054037	0.0364504	0.133936
19	0.105238	0.0830922	0.0509126	-0.081055	-0.072374	0.0823018	0.413758	0.0384346	0.120564	0.121964	-0.207285	0.101231	0.0700239	0.0716828	0.127916
19.333	0.148882	0.126701	0.0857074	0.0075222	-0.040515	0.0944848	0.510031	0.0923	0.12632	0.146374	-0.217921	0.147741	0.0943525	0.0998934	0.146117
19.667	0.186997	0.175713	0.121151	0.0500624	0.0085639	0.115231	0.498547	0.153042	0.196723	0.130915	-0.209619	0.23621	0.157132	0.135154	0.126059
20	0.245674	0.214206	0.185416	0.132384	0.0088198	0.152326	0.551597	0.234343	0.220784	0.183741	-0.215006	0.245139	0.213059	0.185126	0.11256
20.333	0.260599	0.244538	0.207257	0.198038	0.0943563	0.191192	0.542467	0.343305	0.223527	0.229405	-0.228015	0.316091	0.257032	0.165794	0.113323
20.667	0.29944	0.314356	0.25892	0.337146	0.172336	0.29855	0.562155	0.450912	0.287408	0.304681	-0.206418	0.341963	0.337794	0.233509	0.12044
21	0.316197	0.373255	0.292851	0.447016	0.198877	0.346162	0.553381	0.539687	0.296672	0.435754	-0.159693	0.406604	0.468091	0.289592	0.14878
21.333	0.326492	0.373698	0.315556	0.386066	0.187473	0.333172	0.575736	0.509406	0.313225	0.473721	-0.132621	0.408131	0.512116	0.320188	0.107071
21.667	0.345496	0.398625	0.335428	0.422341	0.19945	0.368782	0.541002	0.547225	0.313204	0.471051	-0.082291	0.433889	0.53202	0.343871	0.112156
22	0.31864	0.446316	0.315251	0.473335	0.194524	0.352796	0.486355	0.646102	0.337923	0.48809	-0.016339	0.425719	0.540186	0.311915	0.120626
22.333	0.301598	0.416754	0.332585	0.552067	0.237602	0.411578	0.478789	0.722914	0.332993	0.531777	0.0324092	0.439984	0.644601	0.312897	0.12287
22.667	0.27768	0.434957	0.291548	0.621459	0.256371	0.4588	0.456983	0.780321	0.7599	0.594031	0.101495	0.4448	0.733158	0.345155	0.133367
23	0.253796	0.397923	0.292474	0.730483	0.29481	0.499565	0.446436	0.849107	0.355992	0.668064	0.168222	0.445467	0.81876	0.352006	0.112019
23.333	0.200951	0.344221	0.235243	0.75566	0.33907	0.499513	0.485994	0.873378	0.368435	0.742167	0.202428	0.384627	0.897762	0.392894	0.120898
23.667	0.145999	0.331788	0.208994	0.817494	0.358643	0.540408	0.442086	0.893052	0.382499	0.784144	0.255755	0.439876	0.932685	0.41588	0.111516
24	0.0977855	0.245207	0.153194	0.813938	0.338802	0.537907	0.3375	0.850722	0.397791	0.814507	0.27326	0.381905	0.977958	0.458536	0.105426
24.333	0.0323616	0.234614	0.111561	0.823501	0.346514	0.495655	0.252991	0.808139	0.36365	0.788945	0.266594	0.362662	1	0.430492	0.111599
24.667	0.0085471	0.196143	0.0695523	0.782252	0.368351	0.477196	0.355876	0.774231	0.34949	0.794135	0.263001	0.292431	0.951822	0.401486	0.102133
25	-0.075573	0.116977	0.0224415	0.80172	0.322829	0.46212	0.199788	0.73403	0.402159	0.774666	0.26169	0.331883	0.882811	0.375748	0.0987911
25.333	-0.08636	0.0665515	-0.028852	0.785574	0.311651	0.418489	0.240283	0.706682	0.34089	0.714712	0.229455	0.240635	0.868578	0.372441	0.0920691
25.667	-0.133294	0.0190559	-0.032971	0.69619	0.315654	0.407735	0.238286	0.679113	0.317686	0.726785	0.22968	0.180501	0.850698	0.363964	0.0443382
26	-0.143251	-0.036198	-0.094709	0.653003	0.303183	0.378732	0.290294	0.667135	0.242003	0.696666	0.194327	0.0999817	0.827474	0.310916	0.0198977
26.333	-0.166444	-0.046677	-0.108032	0.548443	0.234655	0.287669	0.130199	0.615136	0.221015	0.597856	0.184391	0.0861325	0.737155	0.254384	-0.029435
26.667	-0.17761	-0.090379	-0.133768	0.567463	0.202338	0.275874	0.131747	0.564739	0.138349	0.525868	0.142268	0.0581294	0.645893	0.250945	-0.060621
27	-0.16652	-0.101834	-0.141262	0.55242	0.209435	0.298781	0.200958	0.559503	0.120266	0.443661	0.102747	0.0334362	0.644029	0.199398	-0.068067
27.333	-0.184771	-0.154387	-0.157931	0.571331	0.214582	0.284332	0.228525	0.535632	0.104868	0.422587	0.0830915	0.0456354	0.671372	0.239213	-0.074626
27.667	-0.179349	-0.137506	-0.167744	0.57971	0.199293	0.297138	0.271463	0.516415	0.100846	0.452983	0.0734143	0.193603	0.627403	0.192331	-0.081484
28	-0.19881	-0.192818	-0.18714	0.527671	0.149771	0.271702	0.2507	0.483453	0.123976	0.439862	0.0976727	0.0434869	0.643572	0.20012	-0.128751
28.333	-0.19166	-0.235082	-0.191476	0.499093	0.119527	0.243846	0.0998839	0.448345	0.0956439	0.427137	0.119163	0.0730135	0.507415	0.180974	-0.12388
28.667	-0.203344	-0.204981	-0.19689	0.481713	0.0806444	0.201541	0.188486	0.39466	0.0752358	0.408585	0.147209	0.050002	0.45747	0.154487	-0.13137
29	-0.20912	-0.235462	-0.193104	0.398098	0.0738071	0.16288	0.120807	0.334091	0.0447666	0.377605	0.160987	-0.039066	0.421773	0.122585	-0.127258
29.333	-0.213997	-0.253815	-0.188291	0.346398	0.0218307	0.139606	0.151503	0.281713	0.0331501	0.347765	0.18053	-0.077874	0.384204	0.0848397	-0.133098
29.667	-0.214449	-0.244464	-0.197997	0.343737	0.0269411	0.0924581	0.0966472	0.240637	-0.070999	0.300262	0.178884	-0.109377	0.311392	0.0700641	-0.140517
30	-0.215214	-0.267817	-0.184468	0.263851	-0.027662	0.0853229	0.234876	0.222437	-0.073244	0.268562	0.171914	-0.052884	0.302459	0.0386978	-0.151149
30.333	-0.208444	-0.025964	-0.195335	0.267944	-0.022591	0.0491108	0.141401	0.190286	-0.071214	0.257999	0.169584	-0.131223	0.253925	0.039867	-0.158245
30.667	-0.21567	-0.248597	-0.209871	0.230326	-0.01816	0.0400232	0.228752	0.152498	-0.107132	0.200962	0.148787	-0.211438	0.190571	0.0292722	-0.168962
31	-0.208313	-0.26126	-0.184872	0.153921	-0.077064	0.0258331	0.667867	0.138698	-0.101211	0.15024	0.133528	-0.155346	0.21542	0.0369271	-0.181179
31.333	-0.192316	-0.274267	-0.206723	0.149809	-0.098127	-0.018631	0.0772948	0.111374	-0.070957	0.128887	0.11302	-0.15468	0.165586	-0.011243	-0.190576
31.667	-0.204277	-0.260778	-0.195136	0.0819566	-0.103053	-0.022877	0.184455	0.111034	-0.093119	0.0852684	0.101198	-0.194904	0.15992	-0.021087	-0.20275
32	-0.203279	-0.225446	-0.195964	0.0218618	-0.142162	-0.072238	0.135855	0.0943247	-0.09361	0.0509634	0.0808427	-0.166869	0.151091	-0.044038	-0.205968
32.333	-0.202108	-0.252995	-0.198168	-0.010296	-0.164005	-0.092544	0.199495	0.103668	-0.120079	0.0462834	0.0637881	-0.196669	0.103181	-0.072484	-0.213936
32.667	-0.194128	-0.229332	-0.195946	-0.007636	-0.175269	-0.083668	0.0405916	0.0897262	-0.106398	-0.006056	0.0360402	-0.231155	0.0558343	-0.088278	-0.215189
33	-0.188983	-0.244811	-0.19448	-0.071062	-0.197425	-0.113556	0.126379	0.0777951	-0.145691	-0.033292	0.0261043	-0.242365	0.0838528	-0.09539	-0.21649
33.333	-0.187985	-0.192465	-0.186132	-0.084125	-0.193033	-0.145786	0.0373875	0.0811534	-0.142346	-0.058993	0.0004706	-0.253288	0.0593809	-0.065062	-0.231858
33.667	-0.179971	-0.252836	-0.181804	-0.111053	-0.209931	-0.148703	-0.01997	0.0867756	-0.182593	-0.096287	-0.025467	-0.223342	0.0408262	-0.124004	-0.224163
34	-0.173236	-0.224171	-0.180015	-0.113216	-0.228993	-0.130248	0.0229674	0.0678657	-0.155573	-0.11557	-0.047009	-0.246199	0.004401	-0.110319	-0.236504
34.333	-0.170855	-0.216141	-0.180978	-0.128218	-0.237832	-0.157713	0.0173817	0.0701358	-0.147569	-0.142178	-0.054192	-0.219369	0.0126187	-0.10505	-0.247772
34.667	-0.146944	-0.19903	-0.185043	-0.163699	-0.232595	-0.138815	0.0099631	0.0640006	-0.095142	-0.136198	-0.076509	-0.223906	0.0143326	-0.145286	-0.249479
35	-0.179122	-0.176631	-0.190432	-0.215191	-0.24884	-0.164798	-0.075127	0.0436003	-0.18206	-0.179665	-0.08897	-0.223182	0.037206	-0.166602	-0.243876
35.333	-0.140593	-0.177453	-0.17415	-0.186633	-0.244548	-0.090032	0.0981924	0.0141703	-0.167863	-0.166928	-0.098298	-0.288152	0.0080568	-0.175188	-0.238834
35.667	-0.145089	-0.206842	-0.180212	-0.224351	-0.237728	-0.156106	0.0427114	0.0436622	-0.180818	-0.18434	-0.139979	-0.272952	-0.004469	-0.168496	-0.268537
36	-0.128332	-0.034194	-0.171676	-0.284097	-0.261745	-0.133902	0.0265353	0.0119777	-0.140206	-0.216599	-0.13008	-0.259433	0.0180403	-0.161753	-0.272216
36.333	-0.125226	-0.179345	-0.144815	-0.201139	-0.27008	-0.168943	-0.018355	-0.000751	-0.185089	-0.188352	-0.145963	-0.250791	0.0283888	-0.176932	-0.268573
36.667	-0.096131	-0.175569	-0.12559	-0.196937	-0.248871	-0.143198	-0.093228	0.0122524	-0.209388	-0.219763	-0.144749	-0.240353	0.006456	-0.179165	-0.271744
37	-0.073602	-0.124775	-0.102373	-0.265535	-0.293992	-0.15364	-0.043931	-0.016546	-0.27559	-0.237628	-0.160967	-0.272849	0.0019408	-0.171992	-0.27014
37.333	-0.093236	-0.152209	-0.128569	-0.245779	-0.299208	-0.160669	-0.163678	-0.014323	-0.204506	-0.254074	-0.16272	-0.257322	-0.051063	-0.177095	-0.268245
37.667	-0.03988	-0.133719	-0.111314	-0.228947	-0.281773	-0.153069	-0.067048	-0.03153	-0.231984	-0.245419	-0.15962	-0.255949	-0.065408	-0.174932	-0.276197
38	-0.021464	-0.073499	-0.092765	-0.268952	-0.322995	-0.140211	-0.149949	-0.032602	-0.227543	-0.265865	-0.16665	-0.252643	-0.088061	-0.197508	-0.273719
38.333	-0.000906	-0.058629	-0.066822	-0.262473	-0.317018	-0.161246	-0.117168	-0.02721	-0.214607	-0.283218	-0.182534	-0.235107	-0.050116	-0.177418	-0.277114
38.667	0.0291225	-0.016573	-0.05653	-0.294721	-0.322145	-0.163643	-0.089139	-0.032328	-0.233809	-0.287934	-0.185503	-0.26466	-0.094396	-0.200502	-0.285412
39	0.06582	-0.043088	0.0328592	-0.267695	-0.330567	-0.149978	-0.148895	-0.065171	-0.22882	-0.286383	-0.189552	-0.277247	-0.101926	-0.194374	-0.276211
39.333	0.0871389	0.0209841	-0.036084	-0.275885	-0.351152	-0.147662	-0.117469	-0.070755	-0.233038	-0.291458	-0.194544	-0.266482	-0.135752	-0.190525	-0.27724
39.667	0.118584	0.0050444	0.0151472	-0.288143	-0.339099	-0.167579	-0.097051	-0.070858	-0.235306	-0.280896	-0.185801	-0.269527	-0.118447	-0.193107	-0.285483
40	0.131298	0.052907	-0.000497	-0.305572	-0.33824	-0.167112	-0.161394	-0.074178	-0.245333	-0.277508	-0.197136	-0.331915	-0.119584	-0.195931	-0.275395
40.333	0.152824	0.0746168	0.0496538	-0.337283	-0.320189	-0.163624	-0.071063	-0.061286	-0.220066	-0.282606	-0.190568	-0.280701	-0.089123	-0.190554	-0.281477
40.667	0.169478	0.0801742	0.0935175	-0.314136	-0.352809	-0.14267	0.0210837	-0.081426	-0.183094	-0.279765	-0.203774	-0.336302	-0.123997	-0.188445	-0.278447
41	0.197294	0.0916527	0.0887225	-0.350561	-0.327022	-0.152356	0.0087651	-0.064496	-0.224853	-0.283468	-0.199701	-0.30775	-0.14665	-0.168355	-0.264991
41.333	0.181565	0.11319	0.0839544	-0.300123	-0.330981	-0.163915	0.0405034	-0.051462	-0.19701	-0.262314	-0.181055	-0.339271	-0.150229	-0.160352	-0.268513
41.667	0.169881	0.147947	0.113488	-0.316707	-0.323506	-0.165531	0.148706	-0.034461	-0.217418	-0.248962	-0.186778	-0.326653	-0.094518	-0.144923	-0.259812
42	0.147483	0.139365	0.117113	-0.323048	-0.269699	-0.135492	0.0864482	-0.031228	-0.180204	-0.243294	-0.193094	-0.313707	-0.051376	-0.152036	-0.23286
42.333	0.167489	0.144349	0.113127	-0.297424	-0.281002	-0.167981	0.242044	-0.03033	-0.180804	-0.245649	-0.174037	-0.333409	-0.13998	-0.138056	-0.213009
42.667	0.187045	0.137663	0.127197	-0.288001	-0.262963	-0.137733	0.239734	0.0088609	-0.178962	-0.253922	-0.233105	-0.303291	-0.15604	-0.155699	-0.215027
43	0.157217	0.16765	0.0964139	-0.204238	-0.204578	-0.101601	0.205208	0.0229049	-0.162683	-0.232582	-0.207355	-0.312263	-0.116432	-0.132661	-0.210566
43.333	0.133402	0.203787	0.100471	-0.140871	-0.160192	-0.064921	0.174184	0.11138	-0.11933	-0.166664	-0.169833	-0.264606	-0.044914	-0.087995	-0.200329
43.667	0.127282	0.120769	0.0759491	-0.08774	-0.145574	-0.058832	0.233073	0.113525	-0.072219	-0.127408	-0.130196	-0.19771	0.038966	-0.057397	-0.200813
44	0.106058	0.14702	0.07755	-0.030132	-0.121724	-0.046859	0.26204	0.116403	-0.072381	-0.094185	-0.07652	-0.147815	0.0723376	-0.044704	-0.193375
44.333	0.0450236	0.092168	0.0500588	-0.036134	-0.152245	0.0023171	0.245716	0.119785	-0.072927	-0.081867	-0.049341	-0.108649	0.120573	-0.043428	-0.189899
44.667	0.0242157	0.0772055	0.0474779	-0.012838	-0.113504	0.0097083	0.359131	0.145705	-0.090979	-0.064189	-0.011864	-0.138488	0.103265	-0.027356	-0.181156
45	0.0027852	0.0819016	0.023441	-0.016692	-0.074009	0.0119711	0.369958	0.188042	-0.040009	-0.050755	0.0210799	-0.107298	0.134506	0.0098325	-0.17573
45.333	-0.002264	0.134305	-0.01077	0.0405083	-0.073617	0.0368322	0.348733	0.199893	0.0016997	-0.001231	0.0470267	-0.077829	0.197865	0.0174874	-0.166419
45.667	-0.048473	-0.001076	0.115215	0.0520194	-0.080303	0.0485188	0.437231	0.205894	-0.036684	0.0270495	0.0733387	-0.100152	0.225512	0.0332106	-0.165687
46	-0.061056	-0.010174	-0.042002	0.0613922	-0.075545	0.0541138	0.491011	0.247191	0.0062297	0.043065	0.0680117	-0.060814	0.174587	0.0543192	-0.173892
46.333	-0.082694	-0.061003	-0.043829	0.116355	-0.046754	0.0738724	0.421621	0.271106	0.008972	0.0372688	0.0731956	-0.057565	0.250626	0.0398906	-0.164635
46.667	-0.108824	-0.054641	-0.064761	0.133038	-0.029771	0.112217	0.458511	0.276942	0.0720313	0.101778	0.0771626	-0.00748	0.232592	0.0523977	-0.167775
47	-0.109658	-0.060233	-0.086342	0.15514	0.0037628	0.126689	0.369355	0.313531	0.0706632	0.140699	0.0745736	0.0001863	0.272771	0.0589805	-0.161117
47.333	-0.138345	-0.094163	-0.110109	0.25063	0.0253346	0.144027	0.332597	0.357768	0.0678703	0.141972	0.0611696	0.010779	0.313938	0.083064	-0.160597
47.667	-0.136172	-0.116598	-0.135764	0.212116	0.051926	0.160659	0.339878	0.323836	0.0314593	0.164555	0.0768339	0.0590852	0.334985	0.106747	-0.158205
48	-0.14879	-0.14432	-0.120346	0.216566	0.078618	0.171018	0.413259	0.3428	0.0499853	0.233449	0.083265	0.03881	0.372462	0.0973299	-0.16429
48.333	-0.189331	-0.16842	-0.13599	0.207929	0.0495813	0.169821	0.267656	0.375493	0.0420407	0.215329	0.130796	0.0366079	0.463262	0.102224	-0.170756
48.667	-0.16853	-0.176888	-0.143158	0.207904	0.0501643	0.151569	0.235112	0.385303	0.063284	0.2241	0.1309	0.0672426	0.444707	0.102591	-0.163119
49	-0.173442	-0.2053	-0.134676	0.257903	0.082063	0.191528	0.299318	0.404267	0.0267315	0.249719	0.160421	0.0312464	0.423146	0.117616	-0.154734
49.333	-0.184746	-0.210375	-0.125546	0.337331	0.0912342	0.222897	0.353575	0.419903	0.0475045	0.256107	0.172465	0.0367327	0.447318	0.144486	-0.165832
49.667	-0.173691	-0.196713	-0.145857	0.270324	0.101501	0.25718	0.357834	0.463045	0.0601983	0.323105	0.207767	0.0499825	0.504121	0.153858	-0.150566
50	-0.18776	-0.207651	-0.145228	0.332606	0.104398	0.247468	0.298912	0.44643	0.0646944	0.340516	0.306148	0.0845008	0.547159	0.163764	-0.151019
50.333	-0.190564	-0.272102	-0.132184	0.290801	0.119732	0.290135	0.229208	0.450853	0.0688068	0.303025	0.365666	0.0581437	0.512917	0.158099	-0.136343
50.667	-0.186627	-0.222918	-0.163479	0.343237	0.125446	0.267589	0.42874	0.46783	0.0695532	0.318098	0.442053	0.0382879	0.540772	0.173929	-0.148234
51	-0.191953	-0.223913	-0.152757	0.268821	0.0864126	0.22911	0.186847	0.408657	0.0313017	0.294792	0.460044	0.04343	0.6732	0.144171	-0.158133
51.333	-0.155394	-0.197662	-0.156877	0.260134	0.0686446	0.212397	0.213998	0.405012	0.0310846	0.28095	0.485626	0.0397362	0.464543	0.170935	-0.180811
51.667	-0.17907	-0.195036	-0.149932	0.258319	0.0325289	0.197582	0.149134	0.35057	0.0159377	0.230959	0.477789	0.0349702	0.517033	0.0710681	-0.179762
52	-0.164905	-0.218792	-0.139263	0.266647	0.0683767	0.215803	0.0854169	0.413891	-0.032617	0.207839	0.482638	0.0573249	0.436484	0.102522	-0.157728
52.333	-0.159725	-0.20168	-0.134586	0.187995	0.0383591	0.191488	0.134983	0.330358	0.0221348	0.187835	0.477144	0.0295334	0.497452	0.108702	-0.188116
52.667	-0.175073	-0.2117	-0.134549	0.179914	-0.000473	0.116406	0.193768	0.309106	-0.017181	0.118312	0.402044	0.012948	0.430565	0.0945433	-0.187505
53	-0.156761	-0.202578	-0.121425	0.157114	0.0206348	0.153215	0.142248	0.291569	0.024363	0.0884248	0.40776	0.0086231	0.430727	0.0928716	-0.169771
53.333	-0.115674	-0.186846	-0.139687	0.123415	-0.05315	0.108828	0.0981919	0.252534	-0.083381	0.0870235	0.378431	-0.037873	0.36629	0.0738602	-0.204048
53.667	-0.163507	-0.229973	-0.140028	0.0527286	-0.056843	0.0755562	0.0346832	0.209991	-0.09091	0.0140586	0.305399	-0.067999	0.270766	0.0216982	-0.192197
54	-0.155148	-0.186824	-0.128576	0.0178451	-0.054248	0.0703214	-0.005264	0.238253	0.301712	-0.012829	0.276724	-0.103077	0.276022	0.0055544	-0.195152
54.333	-0.135488	-0.182702	-0.12962	-0.13654	-0.075109	0.0156259	-0.040458	0.145541	-0.121212	-0.028135	0.224471	-0.079575	0.204776	-0.014824	-0.1939
54.667	-0.121702	-0.158579	-0.137626	-0.09216	-0.08411	0.0236679	0.0107156	0.130652	0.338522	-0.045966	0.204085	-0.175855	0.116373	-0.025847	-0.212716
55	-0.13985	-0.172334	-0.127038	-0.17856	-0.122338	-0.003565	-0.030378	0.105024	-0.13844	-0.076807	0.183912	-0.139271	0.473106	-0.056249	-0.237665
55.333	-0.11041	-0.200113	-0.131159	-0.172627	-0.105495	-0.006533	0.079136	0.0852696	-0.17576	-0.115228	0.166127	-0.202463	0.0184725	-0.058349	-0.204183
55.667	-0.096037	-0.171679	-0.123889	-0.181752	-0.09797	-0.016323	0.0791198	0.0619832	-0.182521	-0.101713	0.167889	-0.176935	0.0589566	-0.067524	-0.210359
56	-0.085051	-0.145429	-0.106339	-0.215442	-0.130313	-0.061571	0.0110237	0.057575	-0.167722	-0.1479	0.13465	-0.223316	0.0087072	-0.085865	-0.230116
56.333	-0.080458	-0.116822	-0.099854	-0.280519	-0.162796	-0.063497	-0.047733	0.0682432	-0.171173	-0.175322	0.111358	-0.217543	-0.064929	-0.107664	-0.232883
56.667	-0.064565	-0.111781	-0.098791	-0.252151	-0.120659	-0.063317	0.0401392	0.0249432	-0.202487	-0.181689	0.0858162	-0.240439	-0.044818	-0.119706	-0.214371
57	-0.050331	-0.094268	-0.093844	-0.313986	-0.156272	-0.080449	-0.009399	0.0309676	-0.206924	-0.198856	0.0836379	-0.29405	-0.070797	-0.112694	-0.255421
57.333	-0.047328	-0.125611	-0.071193	-0.323717	-0.148333	-0.092451	-0.067113	0.0201317	-0.236188	-0.234998	0.0380171	-0.29935	-0.094645	-0.131411	-0.226421
57.667	-0.051582	-0.105109	-0.08322	-0.262281	-0.139475	-0.102501	-0.049093	0.0366597	-0.215712	-0.23118	0.0624733	-0.31364	-0.106703	-0.137664	-0.221614
58	-0.014297	-0.055292	-0.071742	-0.336	-0.130994	-0.120987	-0.011056	0.0012138	-0.199432	-0.212351	0.0251728	-0.275335	-0.094432	-0.137299	-0.254587
58.333	-0.000996	-0.061517	-0.064042	-0.337278	-0.157666	-0.118748	-0.066685	0.0128756	-0.226888	-0.226798	-0.013253	-0.306168	-0.087098	-0.172631	-0.241357
58.667	-0.028854	-0.073146	-0.063411	-0.247846	-0.1516	-0.098211	0.0202492	-0.004236	-0.224771	-0.254232	-0.019691	-0.265206	-0.107523	-0.141096	-0.215341
59	0.0122673	-0.009189	-0.047777	-0.351551	-0.19574	-0.137184	-0.053164	-0.010111	-0.233264	-0.217707	-0.014583	-0.21795	-0.08517	-0.145528	-0.252742
59.333	0.023253	-0.025128	-0.042803	-0.343679	-0.205911	-0.132212	-0.094406	-0.026412	-0.252005	-0.267197	-0.063155	-0.292675	-0.1626	-0.15725	-0.243526
59.667	0.016787	-0.030204	-0.02652	-0.323416	-0.181382	-0.134765	0.0352738	0.0098222	-0.268576	-0.278331	-0.052464	-0.276326	-0.16021	-0.158813	-0.211844
60	0.0373456	0.0186933	-0.025351	-0.302705	-0.174436	-0.096681	-0.001024	0.0259717	-0.234157	-0.279546	-0.059571	-0.223678	-0.126631	-0.160699	-0.219362
60.333	0.0464306	0.0165494	-0.010445	-0.332874	-0.233103	-0.145546	-0.129946	-0.023732	-0.188174	-0.293411	-0.081082	-0.230297	-0.165758	-0.134311	-0.249895
60.667	0.0709639	0.0776887	0.0139878	-0.351497	-0.212322	-0.149973	-0.067616	-0.033487	-0.24689	-0.299685	-0.09333	-0.276948	-0.1642	-0.174252	-0.23107
61	0.0581386	0.0723835	0.0258167	-0.327256	-0.200244	-0.098821	-0.01884	-0.00726	-0.085489	-0.320201	-0.087279	-0.246446	-0.206758	-0.165981	-0.208958
61.333	0.0937648	0.102715	0.0322752	-0.369856	-0.244851	-0.13446	-0.146511	-0.016321	-0.166159	-0.320765	-0.095968	-0.201829	-0.155872	-0.127934	-0.230421
61.667	0.0920679	0.0732104	0.0371157	-0.353621	-0.249223	-0.123971	-0.108369	-0.02856	-0.213422	-0.339526	-0.116582	-0.271659	-0.158368	-0.077612	-0.219366
62	0.106648	0.100898	0.0401198	-0.364089	-0.199189	-0.102366	-0.125171	-0.035523	-0.236437	-0.332138	-0.106774	-0.276328	-0.171874	-0.160837	-0.19603
62.333	0.124511	0.106801	0.0518408	-0.378395	-0.234866	-0.111426	-0.124918	-0.056744	-0.219062	-0.328935	-0.091642	-0.200614	-0.166671	-0.143561	-0.225447
62.667	0.107746	0.146443	0.053254	-0.36763	-0.220549	-0.147666	-0.216368	-0.083555	-0.225057	-0.331279	-0.12368	-0.266026	-0.198426	-0.127275	-0.226543
63	0.107604	0.162693	0.0594156	-0.318029	-0.206157	-0.106614	-0.185211	-0.058677	-0.220835	-0.339889	-0.117203	-0.2754	-0.229862	-0.1424	-0.207239
63.333	0.136077	0.125199	0.066063	-0.364955	-0.213763	-0.121635	-0.211648	-0.075805	-0.208502	-0.329291	-0.112186	-0.208178	-0.1875	-0.139703	-0.211088
63.667	0.103968	0.144207	0.0552241	-0.36876	-0.211595	-0.113723	-0.187373	-0.07851	-0.260094	-0.335775	-0.131675	-0.260967	-0.212967	-0.161527	-0.203873
64	0.0845419	0.0853888	0.0440061	-0.357447	-0.192122	-0.097038	-0.23712	-0.062928	-0.203588	-0.337804	-0.127632	-0.279636	-0.268569	-0.148807	-0.188776
64.333	0.0822224	0.196191	0.0296306	-0.339431	-0.21072	-0.096023	-0.191515	-0.070902	-0.138697	-0.306301	-0.112454	-0.261929	-0.220178	-0.113548	-0.203451
64.667	0.0588917	0.155765	0.0373317	-0.361933	-0.218136	-0.143145	-0.246162	-0.094448	-0.188481	-0.319644	-0.139061	-0.264457	-0.219867	-0.123553	-0.209795
65	0.0781716	0.119594	0.0286505	-0.324266	-0.187344	-0.098032	-0.218029	-0.094504	-0.203824	-0.31793	-0.132721	-0.262299	-0.26731	-0.131282	-0.173298
65.333	0.0516955	0.109748	0.0182151	-0.383723	-0.198497	-0.111856	-0.293259	-0.075508	-0.182229	-0.305007	-0.108341	-0.231452	-0.20603	-0.107171	-0.191588
65.667	0.0376266	0.104672	0.0017629	-0.393943	-0.184004	-0.118627	-0.272111	-0.097565	-0.191073	-0.307049	-0.140835	-0.250849	-0.280298	-0.118409	-0.19344
66	0.0145719	0.0490149	-0.006217	-0.343695	-0.165361	-0.10405	-0.26681	-0.084396	-0.168766	-0.291987	-0.123376	-0.264297	-0.195839	-0.11113	-0.165634
66.333	-0.002159	0.0375019	-0.013144	-0.333287	-0.166	-0.083901	-0.196809	-0.047114	-0.142731	-0.28997	-0.102251	-0.207287	-0.161636	-0.073191	-0.143505
66.667	-0.022379	0.00748	-0.026304	-0.302532	-0.143735	-0.079035	-0.150223	-0.063043	-0.164455	-0.260573	-0.107776	-0.225881	-0.173382	-0.057628	-0.120773
67	-0.043498	0.0193609	-0.037845	-0.280926	-0.123004	-0.080782	-0.187042	-0.022953	-0.121047	-0.236093	-0.107961	-0.142306	-0.145935	-0.067662	-0.118058
67.333	-0.069352	0.0154352	-0.047687	-0.28106	-0.096628	-0.071254	-0.104843	-0.021936	-0.180125	-0.229797	-0.11525	-0.175434	-0.134184	-0.045829	-0.106735
67.667	-0.060301	-0.016254	-0.052724	-0.214055	-0.071571	-0.039392	0.0145149	0.0129492	-0.115586	-0.185867	-0.094399	-0.169987	-0.126701	-0.04297	-0.09555
68	-0.093586	-0.056966	-0.066641	-0.214528	-0.060449	-0.016094	-0.069845	0.0222382	-0.098211	-0.207313	-0.072103	-0.113322	-0.093589	-0.003477	-0.096595
68.333	-0.108554	-0.037095	-0.080881	-0.224259	-0.078644	-0.023983	0.0297642	0.0451133	-0.056722	-0.188135	-0.05618	-0.070255	-0.054969	-0.018629	-0.089591
68.667	-0.099399	-0.043379	-0.059713	-0.178089	-0.043853	-0.003393	0.0984533	0.039262	-0.056304	-0.184038	-0.022734	-0.051497	-0.045303	-0.006015	-0.091394
69	-0.121693	-0.088402	-0.081672	-0.180501	-0.042717	-0.001104	0.0760218	0.0482434	-0.072086	-0.173905	0.0005811	-0.101435	-0.032097	0.0223569	-0.088261
69.333	-0.118553	-0.087672	-0.08528	-0.140556	-0.013649	0.00077	0.0932683	0.0527845	-0.050545	-0.156634	0.0098415	-0.12062	0.0098501	-0.001264	-0.099143
69.667	-0.096058	-0.110911	-0.078847	-0.184489	-0.022348	0.0018613	0.0582217	0.0661662	0.0258863	-0.169094	0.0266466	-0.068413	-0.002104	0.0195242	-0.098205
70	-0.093159	-0.087132	-0.07892	-0.199979	-0.026318	-6.73e-05	0.225746	0.0643128	-0.048755	-0.179634	0.0324085	-0.100679	0.0148964	0.040874	-0.097413
70.333	-0.10201	-0.098817	-0.075295	-0.127463	-0.026227	0.0082368	0.228293	0.0808479	-0.065852	-0.200777	0.0326792	-0.062948	0.0805937	0.0493061	-0.102751
70.667	-0.122265	-0.116367	-0.078118	-0.111278	-0.004968	0.0096405	0.196582	0.0852873	0.0187998	-0.180472	0.0210701	-0.064673	0.0661447	0.0491903	-0.108839
71	-0.118295	-0.080977	-0.084371	-0.129553	-0.008812	0.0031301	0.249007	0.114448	0.0059228	-0.162387	0.0247329	-0.038704	0.0948909	0.0579439	-0.109515
71.333	-0.10292	-0.082603	-0.069951	-0.086077	-0.006583	0.0102628	0.20224	0.121544	0.0131043	-0.16251	-0.001464	0.026912	0.122234	0.0581751	-0.11975
71.667	-0.103338	-0.113085	-0.066838	-0.058355	0.0038849	0.0082301	0.169278	0.145145	0.0300181	-0.144205	-0.032938	0.0588662	0.0955197	0.066555	-0.124577
72	-0.131646	-0.132588	-0.06602	0.0365467	0.0430781	0.0363435	0.0948227	0.148662	0.0114414	-0.146652	-0.044882	0.087188	0.0945905	0.0509472	-0.120047
72.333	-0.128713	-0.145078	-0.082068	0.308415	0.0411064	0.0659166	0.075058	0.187151	0.0033872	-0.088385	-0.030739	0.0823467	0.0692351	0.0610944	-0.126048
72.667	-0.102106	-0.128369	-0.0962	0.248171	0.0814818	0.0755206	0.0957889	0.172972	0.0422777	-0.070638	-0.009127	0.120268	0.038987	0.0604962	-0.116587
73	-0.112028	-0.111718	-0.040787	0.217763	0.0807819	0.055369	0.0238353	0.183065	0.0295103	-0.047275	0.0359857	0.100566	0.0458015	0.0990786	-0.130609
73.333	-0.106675	-0.11869	-0.082635	0.172528	0.083036	0.0121019	-0.000517	0.17838	0.0135094	-0.026794	0.0513609	0.123667	0.043625	0.0608246	-0.147621
73.667	-0.094791	-0.129227	-0.070157	0.204227	0.100949	0.031234	0.0127076	0.182015	-0.046687	-0.048648	0.0648652	0.0655992	0.0200291	0.0190075	-0.141748
74	-0.10613	-0.151201	-0.06467	0.315887	0.176087	0.0964703	0.0297895	0.2385	-0.043122	0.0149671	0.0883935	0.0765935	0.0170211	0.0627355	-0.114831
74.333	-0.103922	-0.102303	-0.074161	0.326693	0.203217	0.128465	0.0384869	0.258654	0.036127	0.0640956	0.169556	0.15007	0.147786	0.111154	-0.1214
74.667	-0.091623	-0.136636	-0.071479	0.359586	0.20956	0.144993	-0.030339	0.276105	0.0260222	0.110677	0.242079	0.173475	0.0994519	0.14561	-0.113657
75	-0.077941	-0.084693	-0.075897	0.410481	0.253055	0.186826	0.0024857	0.316242	0.0429041	0.168758	0.346393	0.12434	0.0948328	0.133996	-0.113663
75.333	-0.065435	-0.086204	-0.075213	0.360521	0.222207	0.190366	-0.01509	0.311155	0.0486606	0.192261	0.478345	0.164251	0.14364	0.166628	-0.10251
75.667	-0.070968	-0.129849	-0.061656	0.428272	0.234662	0.222202	0.0036604	0.325554	0.0299515	0.243051	0.634073	0.327022	0.176796	0.207383	-0.101541
76	-0.067274	-0.075778	-0.066073	0.410296	0.210998	0.217853	-0.070274	0.334749	0.0642064	0.242882	0.790667	0.29705	0.253043	0.24157	-0.101828
76.333	-0.05888	-0.073841	-0.044502	0.377939	0.184124	0.218008	-0.155721	0.308157	0.0534668	0.269129	0.881427	0.233284	0.279763	0.245017	-0.092896
76.667	-0.05294	-0.111278	-0.066946	0.355288	0.2123	0.196503	-0.058361	0.305145	0.0514182	0.305502	0.958012	0.220428	0.207678	0.280787	-0.097102
77	-0.054568	-0.069163	-0.05285	0.326173	0.192786	0.196944	-0.116031	0.284981	0.050653	0.247014	0.976885	0.247545	0.24001	0.283537	-0.093593
77.333	-0.029378	-0.073894	-0.043585	0.251648	0.174263	0.161825	-0.109106	0.270242	0.040023	0.240194	0.991683	0.220098	0.209717	0.314053	-0.090976
77.667	-0.025961	-0.05138	-0.046004	0.221489	0.14514	0.14524	-0.149783	0.223772	0.0193409	0.215922	1	0.225315	0.148911	0.280088	-0.089209
78	-0.024029	-0.060422	-0.036415	0.183373	0.153747	0.145394	-0.062536	0.195186	0.034469	0.167828	0.993836	0.163729	0.126777	0.235563	-0.089391
78.333	0.0219992	-0.033366	-0.015086	0.140027	0.103883	0.123552	-0.095124	0.178342	0.0654905	0.150126	0.967503	0.196641	0.136606	0.256538	-0.089059
78.667	-0.014809	-0.047467	-0.043386	0.0683959	0.103158	0.106628	-0.102751	0.129624	0.0322581	0.126156	0.932636	0.148155	0.0469554	0.227853	-0.093381
79	0.0160477	-0.005294	-0.015635	0.043408	0.0972012	0.0622661	-0.097763	0.078565	0.0017888	0.10464	0.893708	0.156854	0.0327217	0.177887	-0.096728
79.333	0.0033951	-0.008875	-0.0224	-0.050957	0.0448726	0.0531542	-0.108458	0.0637784	-0.001881	0.0523836	0.861078	0.121662	0.0123555	0.177797	-0.094596
79.667	0.0701594	-0.013549	-9.86e-05	-0.035617	0.0213335	0.0288894	-0.110768	0.0543786	-0.05161	0.0258559	0.805083	0.128715	-0.05422	0.173366	-0.094403
80	0.0105759	0.0161503	-0.002411	-0.029974	0.0391213	0.0244877	-0.09869	0.0267157	-0.037742	0.0077353	0.763143	0.0808419	-0.034101	0.158187	-0.093702
80.333	0.0303742	0.0301005	0.0206177	-0.103902	-0.007472	0.0023333	-0.137951	0.0042881	-0.048262	-0.018059	0.733631	0.0987213	-0.037369	0.304346	-0.093583
80.667	0.0295759	0.0254266	0.0109122	-0.100098	-0.049776	-0.001626	-0.125561	-0.00426	-0.079905	-0.038471	0.700453	0.0871276	-0.075569	0.243581	-0.093471
81	0.0529337	0.03748	0.0153197	-0.097737	-0.027712	-0.025813	-0.111398	-0.033532	-0.106703	-0.069451	0.656551	0.0109686	-0.074107	0.18855	-0.087417
81.333	0.0426312	0.0461996	0.0322761	-0.152619	-0.055415	-0.044192	-0.157018	-0.038595	-0.088012	-0.090315	0.618702	0.0248891	-0.131425	0.16249	-0.089688
81.667	0.0415909	0.0462964	0.0180368	-0.145086	-0.059914	-0.046641	-0.09521	-0.040023	-0.074332	-0.105077	0.5856	0.0197788	-0.147641	0.112257	-0.092077
82	0.0566892	0.0788122	0.0478391	-0.095435	-0.059507	-0.0783	-0.17394	-0.042065	-0.048298	-0.115756	0.55011	0.0140195	-0.167487	0.0991957	-0.090109
82.333	0.0670529	0.0274665	0.0478477	-0.142809	-0.047317	-0.060962	-0.030022	-0.04966	-0.062052	-0.113995	0.516719	0.0216861	-0.147004	0.0622013	-0.084129
82.667	0.0573038	0.0865941	0.0477226	-0.185699	-0.0575	-0.074631	-0.149099	-0.086123	-0.038232	-0.127594	0.472938	0.0080268	-0.147889	0.0303004	-0.078273
83	0.0665616	0.0992797	0.0318898	-0.176773	-0.058099	-0.083511	-0.115962	-0.075888	-0.059166	-0.13832	0.421826	-0.037608	-0.14175	-0.012831	-0.086301
83.333	0.0799319	0.117828	0.0531642	-0.1782	-0.043344	-0.107331	-0.15564	-0.07965	-0.063493	-0.162393	0.397303	-0.043941	-0.216374	-0.043796	-0.084319
83.667	0.0759542	0.073379	0.0439984	-0.217559	-0.067109	-0.098977	-0.092789	-0.08633	-0.090971	-0.163737	0.345507	-0.069477	-0.191273	-0.040937	-0.080139
84	0.0857303	0.0968707	0.0534525	-0.179991	-0.061622	-0.102676	-0.060069	-0.085084	-0.09919	-0.153163	0.326535	-0.035189	-0.198803	-0.076109	-0.077182
84.333	0.0695528	0.119213	0.0491702	-0.202751	-0.066637	-0.084088	-0.052622	-0.106116	-0.096119	-0.149844	0.280991	-0.092356	-0.185076	-0.108359	-0.072078
84.667	0.127712	0.0570601	0.042973	-0.213865	-0.066909	-0.096534	-0.101848	-0.135813	-0.091481	-0.162769	0.262095	-0.022075	-0.219066	-0.122358	-0.074156
85	0.0915594	0.104176	0.0556925	-0.211056	-0.091253	-0.106793	-0.113645	-0.123141	-0.055527	-0.15631	0.228719	-0.047572	-0.196193	-0.124485	-0.069119
85.333	0.0937672	0.145888	0.0576711	-0.268574	-0.124792	-0.092007	-0.091082	-0.118127	-0.073885	-0.173454	0.205337	-0.067216	-0.203462	-0.111497	-0.06465
85.667	0.102265	0.118682	0.0455368	-0.24677	-0.1022	-0.100262	-0.100168	-0.146027	-0.051545	-0.179821	0.177863	-0.075826	-0.211779	-0.109576	-0.065454
86	0.0602031	0.116423	0.0471646	-0.220092	-0.083834	-0.097608	-0.075684	-0.150056	-0.025894	-0.17027	0.162968	-0.079577	-0.148524	-0.11114	-0.069236
86.333	0.0634131	0.111923	0.0369721	-0.259709	-0.116291	-0.118747	-0.187091	-0.17563	-0.059049	-0.15744	0.13954	-0.062903	-0.217015	-0.106728	-0.067298
86.667	0.0589515	0.0847175	0.0217613	-0.268735	-0.097271	-0.102661	-0.107246	-0.159173	-0.084664	-0.18048	0.10872	-0.118733	-0.254643	-0.05989	-0.062198
87	0.0596041	0.076136	0.0168312	-0.275026	-0.092689	-0.120834	-0.211311	-0.154024	-0.073262	-0.178393	0.105781	-0.106591	-0.248192	-0.093186	-0.056565
87.333	0.0481266	0.0382403	0.0202672	-0.290873	-0.122681	-0.125729	-0.166332	-0.154167	-0.07326	-0.169145	0.0997237	-0.029443	-0.282695	-0.092339	-0.057391
87.667	0.0400364	0.0755259	0.0116142	-0.315513	-0.120941	-0.117296	-0.253299	-0.161745	-0.09745	-0.168559	0.0740293	-0.085617	-0.209209	-0.088515	-0.053111
88	0.0403434	0.0808543	0.0093559	-0.310715	-0.115579	-0.097331	-0.206712	-0.136157	-0.093337	-0.161519	0.0589673	-0.059074	-0.250156	-0.093	-0.045826
88.333	0.0300409	0.0261174	0.0060991	-0.292948	-0.120695	-0.125681	-0.201768	-0.144509	-0.079251	-0.191429	0.0454721	-0.084513	-0.227854	-0.113888	-0.048304
88.667	0.0300374	0.0504703	-0.000827	-0.295111	-0.113371	-0.126725	-0.317301	-0.12649	-0.070886	-0.180635	0.055995	-0.071091	-0.277279	-0.10859	-0.043405
89	0.0084687	0.0328071	-0.004785	-0.296678	-0.112109	-0.117147	-0.235267	-0.133595	-0.076913	-0.179897	0.034225	-0.060499	-0.245311	-0.077056	-0.04401
89.333	0.0311699	0.0195124	0.0102281	-0.334853	-0.133776	-0.119985	-0.280053	-0.145496	-0.063429	-0.097051	0.0089108	-0.061381	-0.273889	-0.089421	-0.043062
89.667	0.0031738	0.0374276	0.0220853	-0.327221	-0.133092	-0.112828	-0.220956	-0.136562	-0.031115	-0.158366	0.0047247	-0.064827	-0.261105	-0.089644	-0.033663
90	-0.001634	-0.000181	0.0022584	-0.343308	-0.128862	-0.110773	-0.187089	-0.12583	-0.067339	-0.183393	0.144206	-0.053661	-0.259384	-0.08282	-0.033626
90.333	0.0012305	-0.011406	-0.003697	-0.32017	-0.100549	-0.119833	-0.263569	-0.125902	-0.07057	-0.171144	-0.023194	-0.068772	-0.27606	-0.091353	-0.032013
90.667	-0.010488	0.0127743	0.0055693	-0.344312	-0.042365	-0.107626	-0.259519	-0.134024	-0.048888	-0.168187	-0.028566	-0.03699	-0.271955	-0.074504	-0.025678
91	0.006476	-0.000923	0.0002614	-0.357814	-0.11025	-0.105155	-0.348884	-0.147043	-0.073987	-0.170634	-0.035338	-0.125198	-0.266648	-0.064276	-0.023714
91.333	-0.013503	-0.009619	-0.017353	-0.322791	-0.090665	-0.103125	-0.232906	-0.133891	-0.062476	-0.158386	-0.037821	-0.033763	-0.171535	0.0061182	-0.015635
91.667	-0.017066	-0.004349	-0.005657	-0.317048	-0.099917	-0.085294	-0.244391	-0.132078	-0.022544	-0.140918	-0.04263	0.0152888	-0.226158	-0.047759	-0.014843
92	-0.006702	-0.009884	-0.004083	-0.315482	-0.079136	-0.124971	-0.284546	-0.141336	-0.038161	-0.161364	-0.052718	-0.004585	-0.247407	-0.050395	-0.008156
92.333	-0.022085	-0.044044	-0.014951	-0.335159	-0.097055	-0.094669	-0.274702	-0.153756	-0.056847	-0.146255	-0.070944	-0.018721	-0.287055	-0.058687	-0.002817
92.667	-0.01414	-0.012564	0.0159054	-0.294757	-0.065735	-0.111514	-0.215708	-0.146975	-0.060814	-0.130973	-0.070719	-0.028307	-0.22677	-0.046367	-0.002521
93	-0.001841	-0.027066	0.0059288	-0.292246	-0.083011	-0.104435	-0.163179	-0.121765	-0.02497	-0.1297	-0.080108	-0.038828	-0.230609	-0.058732	0.0012507
93.333	-0.00848	-0.039383	-0.004857	-0.307149	-0.07799	-0.102353	-0.087549	-0.155713	-0.012308	-0.118405	-0.08545	-0.039309	-0.226705	-0.047432	0.0070883
93.667	-0.01937	-0.03624	-0.00088	-0.291262	-0.071848	-0.084106	-0.133438	-0.166746	-0.014028	-0.115215	-0.081787	-0.030936	-0.186897	-0.062583	0.006841
94	-0.021033	-0.020393	0.0007743	-0.275425	-0.075944	-0.094495	-0.121569	-0.167274	-0.057376	-0.11857	-0.085973	-0.037957	-0.242187	-0.078325	0.014739
94.333	-0.014298	-0.029089	-0.005343	-0.271233	-0.061138	-0.062761	-0.131742	-0.180925	-0.030739	-0.109042	-0.099423	0.0179045	-0.151492	-0.079488	0.0131645
94.667	-0.012297	-0.040028	0.0202774	-0.23267	-0.056732	-0.064664	-0.052836	-0.164019	-0.033116	-0.091807	-0.098148	-0.039303	-0.189692	-0.073814	0.0149655
95	-0.007186	-0.02809	0.0032842	-0.239807	-0.056576	-0.077552	-0.076623	-0.177629	-0.059859	-0.098905	-0.098896	-0.01603	-0.196546	0.0320366	0.019076
95.333	-0.006291	-0.003219	0.0148162	-0.248046	-0.063805	-0.071669	-0.138611	-0.184207	-0.046868	-0.102283	-0.10433	-0.020068	-0.201424	-0.097955	0.0225094
95.667	-0.003081	-0.024102	0.0014405	-0.23375	-0.056104	-0.073286	-0.077742	-0.189349	-0.06914	-0.100883	-0.106554	-0.056505	-0.188641	-0.095444	0.0333154
96	-0.007128	-0.039868	-0.016416	-0.242677	-0.061709	-0.076438	-0.10278	-0.199127	-0.042502	-0.080031	-0.102845	-0.018659	-0.197054	-0.111132	0.035168
	-0.010864	-0.017354	0.0118477	-0.249474	-0.051104	-0.063448	-0.115351	-0.206178	-0.026936	-0.086641	-0.111701	0.0081707	-0.157758	-0.128965	0.0400877
	-0.01778	0.0047001	0.0113987	-0.212354	-0.063324	-0.064647	-0.056149	-0.192228	-0.063128	-0.070755	-0.128436	-0.043012	-0.170647	-0.127446	0.0408563
	-0.029603	-0.036012	0.0040939	-0.216904	-0.031651	-0.064545	-0.18805	-0.171679	0.0077915	-0.074923	-0.141156	-0.007748	-0.153959	-0.133512	0.04639
	0.0021528	-0.000967	0.000918	-0.157665	-0.025297	-0.063348	-0.061542	-0.160372	-0.031337	-0.034143	-0.14306	-0.017753	-0.122198	-0.134461	0.0551705
	0.0161111	0.0056823	0.0256749	-0.170421	-0.040863	-0.051037	-0.103262	-0.149379	-0.007901	-0.040184	-0.133176	0.0087506	-0.111493	-0.164941	0.0521266
	0.0179733	0.0239434	0.0228229	-0.156622	-0.001695	-0.042162	4.089e-05	-0.13174	0.0065143	-0.038446	-0.124844	-0.002976	-0.104991	-0.124992	0.0529201
	0.0327605	-0.001939	0.0225886	-0.146065	-0.033976	-0.030942	-0.117725	-0.120385	0.0479486	-0.016106	-0.091276	0.0775003	-0.068813	-0.126181	0.0594909
	0.0097409	0.0299434	0.0337441	-0.058224	-0.024162	-0.020218	-0.073745	-0.128886	0.0271021	0.0036644	-0.070973	0.0873076	-0.06923	-0.111342	0.0693774
	-0.003292	0.0114181	0.012271	-0.072521	-0.011606	-0.025349	-0.06907	-0.117302	0.037791	-0.002597	-0.037816	0.0814909	-0.058569	-0.09814	0.0783777
	0.0135689	0.0091592	0.0328437	-0.085236	0.0106195	-0.024803	-0.082579	-0.120757	-0.002981	-0.021206	-0.013481	0.0469291	-0.054873	-0.087483	0.0833673
	0.0164339	0.0205794	0.0374414	-0.091676	-0.015083	-0.022279	-0.107304	-0.09699	0.0395809	0.0122139	0.0155687	0.104014	-0.068646	-0.078621	0.0864586
	0.0256225	0.0379208	0.0360197	-0.076187	-0.008765	-0.02905	-0.103776	-0.096407	0.0593126	0.0170445	0.0316284	0.0604441	-0.100238	-0.109344	0.0908767
	0.0437965	0.0243387	0.0518696	-0.076718	0.0493043	-0.017362	-0.101334	-0.095485	0.0355843	0.0252004	0.0455738	0.0562913	-0.06484	-0.08435	0.0962587
	0.0157658	0.0076518	0.0501523	-0.045118	-0.019561	-0.01916	-0.078622	-0.097102	-0.004115	0.021461	0.0398058	0.0091248	-0.122633	-0.081464	0.094515
	0.0425104	0.0424667	0.0590396	-0.037734	0.0056218	-0.01294	-0.002531	-0.102977	0.0409912	0.0275706	0.0550136	-0.006159	-0.11509	-0.102941	0.101989
	0.0580234	0.0471628	0.0652013	-0.028918	-0.001506	-0.034834	-0.053781	-0.020653	0.0425278	0.0294713	0.0417161	0.0122944	-0.093464	-0.089283	0.105555
	0.0495184	0.0855405	0.0555228	-0.030534	-0.008671	-0.02687	-0.082781	-0.118955	0.0510565	0.0406607	0.024768	0.0137822	-0.123193	-0.08838	0.11089
	0.0545946	0.0284469	0.0756907	-0.044185	0.0059729	-0.011123	-0.060799	-0.111511	0.0174086	0.0464214	0.0316099	0.0319485	-0.121575	-0.067486	0.116212
	0.0523097	0.0622273	0.078344	-0.010853	0.0214073	-0.034995	-0.096932	-0.11428	0.0066689	0.0417414	0.0120758	0.0278531	-0.14823	-0.089338	0.119192
	0.0708644	0.0307108	0.0849117	-0.028879	0.0069989	-0.04502	-0.04263	-0.121527	0.046217	0.0647668	-0.010211	0.0278492	-0.120739	-0.064744	0.129742
	0.0659876	0.0551221	0.0762035	0.0144568	0.0480031	-0.014642	-0.028051	-0.108453	0.0068146	0.0395539	-0.033685	0.0329913	-0.112261	-0.071267	0.13076
	0.0672623	0.0861435	0.0768598	-0.018795	0.0299333	-0.003188	-0.009449	-0.123145	0.0281357	0.059662	-0.045309	0.044043	-0.127586	-0.058654	0.130843
	0.0528478	0.085838	0.0649953	-0.003007	0.0421622	-0.024355	-0.024582	-0.135762	0.0025759	0.0640614	-0.058105	0.0474243	-0.111424	-0.070776	0.134614
	0.072646	0.0761069	0.0852442	0.0514672	0.0642763	1.017e-05	-0.104147	-0.117034	0.0516829	0.0585442	-0.072893	0.0856719	-0.082315	-0.072153	0.140668
	0.0577472	0.131959	0.0995559	0.0037948	0.0605187	-0.028783	-0.048429	-0.120063	0.0432999	0.0687464	-0.095104	0.0367089	-0.05809	-0.076424	0.138241
	0.0750923	0.124526	0.0914696	0.0306216	0.0541342	0.0158097	-0.003615	-0.1244	0.0404292	0.067844	-0.114745	0.0351559	-0.051283	-0.07863	0.142403
	0.075814	0.0873203	0.0839758	0.0711231	0.0824108	-0.002598	-0.034804	-0.116034	0.0655318	0.0759301	-0.11131	0.0884933	-0.057929	-0.053797	0.147092
	0.0899101	0.0951203	0.0773996	0.0771551	0.0783766	0.0056544	-0.064682	-0.134723	0.0903055	0.0784819	-0.128806	0.041309	-0.013747	-0.054343	0.154623
	0.0788132	0.105736	0.0610013	0.0690741	0.0948815	-0.008588	0.0006709	-0.130946	0.0335072	0.0729753	-0.139076	0.0882956	-0.037135	-0.039075	0.155927
	0.0801916	0.0823247	0.0923958	0.0980888	0.085881	-0.021919	-0.099953	-0.133391	0.078723	0.0678534	-0.150716	0.0561436	-0.020187	-0.057926	0.157233
	0.0715133	0.0843768	0.0815557	0.129929	0.0804633	0.0016927	-0.04434	-0.141767	0.0869458	0.0720562	-0.166843	0.064556	-0.049076	-0.052603	0.164949
	0.0605892	0.106258	0.0729027	0.120306	0.0734248	-0.019552	-0.038414	-0.133329	0.0893364	0.0704096	-0.170831	0.0792403	-0.054014	-0.05698	0.161287
	0.0604125	0.0879052	0.0668392	0.143702	0.0903322	0.0168657	-0.043017	-0.146656	0.0618814	0.0848439	-0.189118	0.0376213	-0.023813	-0.06101	0.172504
	0.083321	0.0608731	0.0707069	0.125269	0.0914795	0.0095501	-0.013677	-0.11588	0.0624315	0.0920697	-0.186383	0.113622	-0.024119	-0.02224	0.176871
	0.0768896	0.0964343	0.0513671	0.126785	0.0827808	0.0189458	-0.021617	-0.139805	0.0896486	0.0937251	-0.204593	0.0954875	-0.014713	-0.022168	0.17817
	0.0852489	0.0604354	0.07982	0.115074	0.0823073	6.982e-05	0.0307038	-0.107876	0.0533152	0.0910914	-0.198801	0.146358	-0.005404	-0.018881	0.181233
	0.0365169	0.430524	0.0556212	0.197187	0.106168	0.0184748	-0.006055	-0.118547	0.0638946	0.0950616	-0.218107	0.110878	-0.000512	0.0031651	0.192785
	0.0548296	0.0602852	0.074495	0.16474	0.0869553	0.0287296	0.0531469	-0.113421	0.0343889	0.0964148	-0.233275	0.12298	0.009361	-0.013754	0.191664
	0.061461	0.092916	0.0586352	0.170383	0.0851738	0.0233126	0.0194556	-0.105835	0.0558744	0.0977109	-0.234282	0.140688	0.0211127	-0.009691	0.192793
	0.0596254	0.121351	0.0472553	0.148419	0.115901	0.027816	0.0426447	-0.092849	0.0942396	0.113889	-0.2451	0.114732	-0.00523	-0.001554	0.201928
	0.0512932	0.0583935	0.0479128	0.201999	0.104889	0.0268506	-0.026598	-0.109701	0.125677	0.131822	-0.255112	0.100786	0.0022005	0.0209232	0.20606
	0.0650782	0.0575141	0.0520774	0.219974	0.116941	0.0433013	0.0087287	-0.081723	0.106552	0.120724	-0.26412	0.128132	0.0379107	0.0079151	0.212696
	0.0529786	0.0868111	0.0949144	0.221531	0.113586	0.0260151	0.0315008	-0.098851	0.144972	0.314233	-0.157023	0.109521	0.0285623	0.0280053	0.222552
	0.0436097	0.0665605	0.0459968	0.235528	0.135222	0.0360356	0.0374272	-0.074493	0.12703	0.148138	-0.284585	0.0881735	0.0499731	-0.004914	0.225567
	0.0502756	0.0369418	0.0457625	0.235205	0.125744	0.021403	0.0537792	-0.071284	0.0998491	0.144621	-0.290931	0.089873	0.0228507	0.0142917	0.231431
	0.0142613	0.0219227	0.0409674	0.234623	0.138009	0.0294468	0.0908346	-0.070315	0.0829166	0.133569	-0.299042	0.0816465	0.0056027	0.0341674	0.237575
	0.032574	0.0413899	0.0386834	0.25051	0.136052	0.0317356	0.0997844	-0.063036	0.121533	0.159269	-0.30119	0.239884	0.061678	0.0389025	0.243908
	0.0265914	-0.000184	0.0458165	0.310952	0.138571	0.0572457	0.0276223	-0.066096	0.119233	0.16303	-0.322823	0.135382	0.06922	0.0426981	0.250762
	0.0178786	0.0564725	0.0600473	0.272081	0.136499	0.0415996	0.122436	-0.049467	0.129648	0.167349	-0.320027	0.12727	0.050309	0.0583394	0.258324
	0.0312494	0.0463381	0.0510704	0.299604	0.147847	0.0601068	0.116998	-0.05475	0.118776	0.166726	-0.32867	0.14379	0.748015	0.0323613	0.256106
	0.0217417	0.0143628	0.0551541	0.288589	0.170414	0.0529977	0.123133	-0.037063	0.112585	0.172835	-0.335488	0.124892	0.0652298	0.0535771	0.266749
	0.0352502	0.018599	0.046257	0.290892	0.148471	0.0691899	0.147573	-0.046219	0.113793	0.201663	-0.34372	0.120051	0.0975619	0.0513695	0.273032
	0.0203519	0.0436991	0.0537692	0.319658	0.159895	0.0721555	0.195515	-0.048025	0.155917	0.184204	-0.361018	0.158144	0.102342	0.0686739	0.279931
	0.019242	0.0185638	0.0588244	0.336738	0.163396	0.0769955	0.183614	-0.049879	0.171758	0.203847	-0.356579	0.150262	0.0821317	0.0655818	0.286318
	0.0254587	0.0126263	0.0558914	0.354058	0.163612	0.0529928	0.0812776	-0.05648	0.128683	0.212933	-0.367276	0.123102	0.102614	0.071843	0.290637
	0.0328162	0.0109988	0.0582221	0.35274	0.151367	0.0746761	0.153303	-0.057221	0.140226	0.197033	-0.378824	0.0959591	0.0776674	0.0845378	0.298424
	0.0536167	0.0183389	0.0630884	0.367135	0.20364	0.0903457	0.123886	-0.054887	0.179633	0.194283	-0.388851	0.139313	0.0975265	0.104065	0.302554
	0.0733804	0.0247593	0.0352464	0.394549	0.196109	0.0897727	0.131228	-0.045236	0.1684	0.20095	-0.383987	0.129251	0.0854237	0.122226	0.306126
	0.0166313	0.0719888	0.0508277	0.390247	0.194831	0.0894842	0.157172	-0.038975	0.184875	0.218232	-0.393086	0.127468	0.26706	0.133822	0.311019
	0.0398508	0.0461637	0.0592293	0.40504	0.216492	0.0976824	0.189371	-0.037044	0.211677	0.221179	-0.419176	0.140872	0.133762	0.140699	0.314711
	0.0397086	0.0225227	0.0713011	0.436085	0.233461	0.115072	0.183785	-0.042509	0.22105	0.219987	-0.411817	0.15594	0.143538	0.138572	0.31785
	0.033139	-0.00612	0.0556314	0.420694	0.24579	0.107026	0.197427	-0.028749	0.230292	0.230177	-0.366446	0.133101	0.124932	0.150436	0.326127
	0.0517277	0.0359375	0.0697273	0.436929	0.262874	0.105123	0.199287	-0.030579	0.214126	0.250471	-0.417786	0.154308	0.139906	0.156777	0.328045
	0.0312303	0.0019504	0.0700057	0.475631	0.255872	0.114859	0.224144	-0.021922	0.190782	0.234257	-0.40994	0.168745	0.138873	0.161726	0.333024
	0.0331967	0.0240616	0.0726333	0.447809	0.24911	0.104574	0.221105	-0.008161	0.242168	0.274792	-0.427831	0.184978	0.207473	0.166434	0.337061
	0.0424545	0.0177793	0.0710227	0.469564	0.247228	0.108138	0.162392	-0.012901	0.219316	0.250998	-0.454286	0.170498	0.142827	0.190249	0.341687
	0.0281777	0.0056341	0.0786416	0.489867	0.244501	0.11613	0.315589	0.0145164	0.269574	0.249783	-0.449118	0.175583	0.186697	0.206346	0.348247
	0.0611434	0.0203306	0.0685313	0.523307	0.251901	0.134273	0.246346	-0.005553	0.264566	0.260274	-0.460407	0.162268	0.182902	0.203014	0.345999
	0.064457	0.0377294	0.0651126	0.533575	0.26257	0.136848	0.289909	0.0043278	0.257937	0.253176	-0.474116	0.188696	0.176932	0.182046	0.355565
	0.0598222	0.0225379	0.0785877	0.51723	0.276546	0.14005	0.334263	0.0067397	0.263474	0.278446	-0.472445	0.228378	0.175951	0.220012	0.357312
	0.0618922	0.0324061	0.0753861						0.286745	0.268638	-0.472935	0.236464	0.161346	0.226409

## Sheet: Figure 2E Period
NcWT	ncfrq::tafrq
20.45	25.23
20.78	25.39
20.67	26.23
	26.23
	26.96
	25.73
	25.67
	26.33
	25.91
	26.24
	25.73
