# Supplementary material for: Circadian oscillations in Trichoderma atroviride and the role of core clock components in secondary metabolism, development, and mycoparasitism against the phytopathogen Botrytis cinerea
Source: eLife. 2022 Aug 11;11:e71358. doi: 10.7554/eLife.71358 (PMC9427114; doi:10.7554/eLife.71358)
Supplement: Table 1—source data 1. — The table shows m/z value, fold change, and p-value for both diffusible and volatile organic compounds (VOCs) compounds produced in the three lighting conditions (LL, DD, and LP). [file elife-71358-table1-data1.xlsx]

## Sheet: Δblr1-TaWT_x0009__x0009__x0009__x0009__x0009__x0009__x0009__x0009__x0009__x0009__x0009__x0009__x0009__x0009__x0009__x0009_
Δblr1/TaWT
DIFFUSIBLES												VOLATILES
DD				LL				LP				DD				LL				LP
m/z	FC	Pval		m/z	FC	Pval		m/z	FC	Pval		m/z	FC	Pval		m/z	FC	Pval		m/z	log2(FC)	Pval
1539.59	2.3185	0.00033377		1329.29	0.28781	2.3974e-05		381.77	3.4274	0.00022291		106.9	0.54938	0.013008		131.89	1.9358	0.017444		N/a
1456.74	3.9291	0.00035576		296.76	0.2715	3.5217e-05		1153.43	3.6192	0.00057828		58.86	0.53369	0.018815		231.93	1.8208	0.022753
1679.08	5.0862	0.0011668		1444.89	0.23301	0.00011839		574.6	2.1684	0.00070003		60.83	0.61488	0.033081		295.67	1.933	0.022766
1502.63	4.0019	0.0012324		837	0.29048	0.00019135		957.65	3.1475	0.0011507		64.84	0.49759	0.044749		81.64	2.0549	0.022902
1481.13	5.3418	0.0016173		1301.17	0.24842	0.00021902		1523.96	3.2101	0.0018326		371.03	0.51935	0.047424		67.69	2.3448	0.023134
839.72	2.1218	0.0019362		869.93	0.34203	0.00024857		1285.11	2.4161	0.0021913						343.75	1.8686	0.023864
1153.43	3.9245	0.0027266		632.01	0.35351	0.00028763		536.73	2.9662	0.0024752						230.96	1.74	0.029287
1455.28	2.6502	0.0032849		1323.7	0.26644	0.00032129		973.14	3.284	0.0035037						462.9	1.8016	0.030668
1516.25	2.4327	0.0034366		498.06	0.31831	0.00032633		1163.88	2.115	0.0045773						155.92	1.6852	0.031115
1704.17	2.6223	0.0044912		935.27	0.27492	0.00036768		1156.41	2.6996	0.0052914						53.74	1.9166	0.036372
1479.23	3.1512	0.0070542		1769.95	0.22547	0.00038587		558.69	2.1314	0.0054451						202	1.6387	0.038284
1702.72	2.0185	0.0073294		997.38	0.30954	0.00051556		1141.07	2.8024	0.0061976						117.87	1.6205	0.038315
1130.91	2.3437	0.0074905		1315.68	0.16526	0.00058095		837	2.0959	0.0065671						233.89	1.6825	0.04032
1501.54	2.3168	0.0080911		1741.95	0.12978	0.00062307		737.37	3.6356	0.0070939						158.01	1.7693	0.046813
1523.96	2.4821	0.0085891		872.16	0.36782	0.00074247		782.82	3.1024	0.0074453						304	1.762	0.048232
1033.97	2.044	0.0095426		516.02	0.34216	0.00078088		1544.55	4.4401	0.0082589						79.89	1.674	0.049926
1677.57	3.2667	0.010947		1558.91	0.21129	0.00084923		759.18	2.6807	0.0086223						167.07	5.853	0.0044
1541.52	2.0914	0.012444		1775.04	0.3884	0.00089026		1543.06	4.2146	0.008687
1544.55	2.6688	0.014007		1679.08	0.30833	0.00089206		804.94	2.2734	0.0087949
1662.81	2.2873	0.019031		1340.57	0.27726	0.00092038		520.69	2.3422	0.0095895
1540.73	2.1319	0.020059		895.13	0.3666	0.00092619		542.99	2.1195	0.0097103
1161.91	0.26003	0.025918		655.82	0.40747	0.00093303		775.16	2.425	0.010031
1459.67	2.1826	0.026006		1342.25	0.25989	0.00093785		1289.64	4.3955	0.010109
1543.06	2.23	0.034329		1328.09	0.24194	0.0010126		1502.63	3.9847	0.010515
1245.48	0.24473	0.034831		1151.11	0.30659	0.0010899		1151.11	2.1678	0.010753
1661.23	2.2046	0.039417		1677.57	0.35108	0.0011294		296.76	2.1767	0.011553
1689.7	2.4005	0.041901		979.82	0.41911	0.0011737		1130.91	2.1206	0.012131
1690.76	2.9794	0.043701		1314.27	0.26305	0.0012183		500.95	2.0441	0.012323
1146.76	0.13478	0.049786		918.81	0.40193	0.0013277		1479.23	3.3606	0.012734
				1474.8	0.31234	0.0016097		903.73	2.0268	0.014009
				1338.82	0.2217	0.0017036		821.02	2.1226	0.014073
				834.47	0.26306	0.0017115		716.95	2.3231	0.014958
				1476.35	0.38638	0.0017202		611.35	2.3106	0.015038
				1701.61	0.36767	0.0018435		928.57	2.2363	0.015201
				856.15	0.46776	0.0019355		1481.13	3.9638	0.015719
				1326.39	0.25152	0.0019724		1074.86	2.3385	0.016781
				1501.54	0.38478	0.0020962		1455.28	3.0935	0.018138
				1578.76	0.22606	0.0021128		663.68	2.293	0.018392
				1701.12	0.35626	0.0021598		590.2	2.3455	0.018761
				484	0.39478	0.0022007		1287.28	2.9541	0.01942
				1704.17	0.37229	0.0022134		1477.65	3.0046	0.020324
				500.95	0.45991	0.0024508		1501.54	2.8485	0.021634
				1071.04	0.25337	0.0024655		1498.4	2.0161	0.021873
				874.89	0.38089	0.0024847		1181.34	2.0199	0.024105
				1702.72	0.38245	0.0024859		1271.46	2.2694	0.02474
				1498.4	0.37149	0.003133		1516.25	2.2851	0.025318
				1108.71	0.301	0.003356		1019.42	2.624	0.025636
				897.39	0.44968	0.003459		1500.32	2.4059	0.025742
				1538.53	0.41658	0.0035752		1456.74	2.8708	0.026649
				1356.02	0.39175	0.0037368		1521.27	2.7608	0.027528
				1535.68	0.38009	0.0037583		1518.28	2.6832	0.029425
				697.12	0.33168	0.003896		1154.95	2.1192	0.031912
				1084.61	0.48255	0.0039403		685.04	2.5885	0.031953
				854.31	0.48328	0.0039673		1059.59	2.8773	0.032638
				1312.17	0.36568	0.0040273		765.59	2.8226	0.032661
				1303.2	0.30197	0.0042449		1713.5	2.2364	0.032724
				660.32	0.42159	0.0043138		1519.27	2.6183	0.033676
				1521.27	0.26683	0.0044136		1125.95	2.0652	0.035963
				1285.11	0.36518	0.0044466		813.02	3.0535	0.037062
				1177.49	0.16866	0.004627		960.03	2.6251	0.038907
				1477.65	0.49417	0.0046852		1541.52	2.4087	0.039743
				755.14	0.40187	0.0048003		1476.35	2.3666	0.039814
				920.39	0.44777	0.0049428		1474.8	2.0742	0.043391
				1786.49	0.40693	0.0050417		1539.59	2.0146	0.045501
				1324.94	0.24597	0.0050533		997.38	2.6472	0.048073
				1537.7	0.43006	0.0050589		1102.3	2.4621	0.049364
				1500.32	0.36735	0.0052634
				611.35	0.2416	0.0053354
				1453.44	0.42627	0.0053765
				1023.06	0.30695	0.0057706
				1728.12	0.4335	0.0062124
				781.17	0.43032	0.006599
				1153.43	0.46574	0.0068254
				654.01	0.34132	0.0070012
				1161.91	0.38516	0.007582
				1751.71	0.4397	0.0078161
				1519.27	0.33335	0.0078514
				1430.49	0.33687	0.0079348
				1496.24	0.29978	0.0080641
				1534.01	0.39148	0.0082737
				1472.45	0.36209	0.0093341
				1165.81	0.20004	0.0095275
				1357.77	0.23042	0.0096801
				1469.68	0.32979	0.010168
				797.13	0.42278	0.010506
				1033.97	0.22635	0.010682
				988.86	0.4401	0.010726
				1543.06	0.44033	0.010987
				1298.82	0.35077	0.011244
				1215.55	0.39175	0.011607
				1752.81	0.47329	0.011961
				809.87	0.36928	0.013077
				952.07	0.42904	0.014934
				1265.74	0.30345	0.015963
				1584.86	0.32664	0.016103
				1540.73	0.44953	0.016276
				1539.59	0.43288	0.016454
				1662.81	0.40583	0.017612
				1125.95	0.28148	0.017698
				1481.13	0.4251	0.018432
				990.09	0.39668	0.018717
				1502.63	0.43568	0.020181
				1337.57	0.28366	0.02031
				1195.44	0.27898	0.021275
				1772.56	0.44282	0.02415
				1043.52	0.38862	0.025681
				1556.47	0.31509	0.025724
				1067.57	0.30377	0.026548
				1753.81	0.49705	0.026809
				850.99	0.4657	0.027107
				1493.59	0.38314	0.029134
				1516.25	0.41754	0.029241
				1541.52	0.46211	0.029567
				1518.28	0.36493	0.030202
				982.28	0.35004	0.031308
				1245.48	0.43996	0.031378
				821.02	0.47927	0.032285
				1191.74	0.34519	0.032533
				1517.67	0.38126	0.032621
				978.47	0.39319	0.033184
				1366.38	0.35365	0.033736
				1090.46	0.31036	0.034484
				946.97	0.384	0.035883
				1077.13	0.40402	0.036031
				1069.57	0.38401	0.037213
				1523.96	0.45105	0.038019
				1804.39	0.31805	0.040341
				638.98	0.19073	0.040846
				1102.3	0.38746	0.042849

## Sheet: Δtafrq-TaWT
Δtafrq/TaWT
DIFFUSIBLES												VOLATILES
DD				LL				LP				DD				LL				LP
m/z	FC	Pval		m/z	FC	Pval		m/z	FC	Pval		m/z	FC	Pval		m/z	FC	Pval		m/z	FC	Pval
1016.13	5.4432	2.0102e-05		856.15	2.4548	5.1938e-07		874.89	4.8884	1.3216e-09		371.03	3.5381	2.2716e-06		77.91	2.1753	0.0045189		382.78	0.30334	0.010222
574.6	6.291	3.2712e-05		484	4.4186	2.4682e-06		869.93	4.1968	8.3242e-09		372.05	3.4909	8.581e-06		131.89	2.2738	0.013529		168.07	0.31465	0.016919
296.76	4.8538	7.6821e-05		759.18	3.0466	1.0457e-05		632.01	7.9911	9.7124e-09		373	3.0522	2.2404e-05		120.91	1.6175	0.013843		184.9	0.29375	0.017213
563.45	4.1737	8.3018e-05		854.31	2.7378	1.098e-05		781.17	5.1859	1.3144e-08		106.9	1.8139	6.6693e-05		133.88	2.0623	0.014422		167.07	0.35859	0.023066
647.89	6.6992	0.00013134		782.82	2.5224	1.8657e-05		296.76	5.4495	1.3614e-08		60.83	1.8443	8.5543e-05		117.87	2.0179	0.015295		186.97	0.33405	0.027991
534.64	5.2787	0.00028989		906.3	2.9144	1.9239e-05		837	5.0724	1.5306e-08		387.78	2.8938	0.00010286		79.89	1.9874	0.018322		183.86	0.33424	0.030657
590.2	4.1908	0.00033909		655.82	2.4183	3.0242e-05		716.95	8.4861	1.6825e-08		389.76	2.8376	0.00018745		231.93	2.0206	0.020846		226.8	0.36289	0.034812
500.95	3.2623	0.00037804		878.25	2.3689	3.5331e-05		647.89	15.274	1.8612e-08		168.07	0.1009	0.00035648		97.77	2.1952	0.023394		224.92	0.37117	0.040496
381.77	2.6821	0.00050457		616.45	5.0204	5.2219e-05		755.14	4.0433	2.6306e-08		100.91	1.6755	0.00036685		155.92	2.0522	0.025251		171.01	0.33541	0.042053
516.02	4.7152	0.00057176		850.99	3.009	5.8211e-05		782.82	6.2025	2.7434e-08		64.84	2.104	0.00046512		96.68	1.8261	0.026009		165.06	0.39496	0.044735
675.79	4.3966	0.00072688		879.66	2.3081	6.1463e-05		655.82	6.7174	2.8623e-08		388.81	2.7331	0.00053435		373	0.41473	0.027743
997.38	8.6381	0.0008031		663.68	4.3997	6.6441e-05		872.16	4.0083	3.5793e-08		167.07	0.016155	0.00059684		67.69	2.3418	0.034717
1023.06	3.2996	0.0011081		1215.55	4.6918	6.6451e-05		797.13	3.9397	4.4918e-08		444.99	1.8749	0.00072176		343.75	1.9033	0.035059
1217.91	8.3819	0.0011687		1161.91	7.6882	6.8106e-05		897.39	3.9011	5.8976e-08		92.91	1.856	0.00077315		167.07	0.0669863	0.018
1004.62	3.6328	0.0013423		716.95	2.8541	6.8304e-05		821.02	3.3517	6.1758e-08		126.96	1.852	0.0011136		208.07	1.8388	0.03617
928.57	2.729	0.0015025		737.37	3.6549	7.6025e-05		759.18	6.2816	6.6791e-08		226.8	0.18563	0.0011329		295.67	2.0899	0.038818
520.69	6.2106	0.001772		853.12	2.6338	7.8023e-05		1728.12	3.7228	6.9138e-08		98.92	1.7257	0.0011496		53.74	2.1041	0.039363
663.68	3.16	0.0020158		1077.13	4.3328	0.00010547		854.31	5.5579	7.8679e-08		382.78	0.02838	0.0013751		159.92	1.9151	0.046159
993.86	3.7593	0.0025364		632.01	2.6654	0.00010811		853.12	5.9612	1.1087e-07		332.83	0.0028074	0.0020287
542.99	3.9771	0.0028239		1469.68	3.0469	0.00011793		480.08	4.0136	2.0212e-07		224.92	0.32036	0.0022868
1008.74	5.0098	0.0032627		1008.74	4.9461	0.00014317		895.13	3.5567	2.1985e-07		150.97	1.7989	0.0024913
1198.86	6.3668	0.0033181		905.34	3.2856	0.00015507		498.06	4.5728	2.5255e-07		165.06	0.20818	0.0030934
1033.97	4.3187	0.0036885		1146.76	7.6104	0.00017319		381.77	4.6281	2.8446e-07		183.86	0.0055593	0.0041426
660.32	4.1826	0.0048322		1677.57	0.17769	0.0001982		877.24	6.2042	4.0946e-07		349.61	0.0051228	0.0045633
1098.35	3.0241	0.0060459		881.78	2.26	0.00030977		1215.55	6.3367	4.414e-07		58.86	1.5723	0.0045969
973.14	4.4	0.0073841		1312.17	6.0895	0.00033743		922.66	3.4351	4.7226e-07		73.9	1.6979	0.0046949
484	2.872	0.0088435		982.28	3.1623	0.00038104		1498.4	8.1895	4.9636e-07		184.9	0.076907	0.0074922
661.86	3.4432	0.0095261		1561.38	9.3703	0.00050272		775.16	4.7205	5.0645e-07		134.93	1.7274	0.0089116
680.87	3.8583	0.010711		480.08	2.7666	0.00050676		1337.57	7.4223	5.1076e-07		152.97	1.5821	0.012949
1215.55	4.3752	0.011335		542.99	2.4088	0.00053263		654.01	4.8861	6.6929e-07		128.97	1.511	0.013393
988.86	3.9773	0.011433		1556.47	2.5981	0.00057599		804.94	3.7351	7.6343e-07		154.93	1.5994	0.01412
702.73	3.3164	0.012754		1472.45	3.111	0.00062262		574.6	9.4033	8.6855e-07		181.89	0.09548	0.018347
536.73	4.7131	0.013302		993.86	25.186	0.00065906		920.39	3.5215	1.1133e-06		462.9	1.6798	0.034046
813.02	7.3454	0.015078		928.57	5.689	0.00067962		1338.82	5.228	1.1476e-06		101.96	1.513	0.041267
809.87	6.4309	0.015294		1679.08	0.20808	0.00082572		1298.82	5.6355	1.1709e-06		209.89	0.36818	0.041991
1153.43	7.0091	0.01533		1001.48	9.6293	0.00084451		879.66	5.3783	1.7454e-06		212.82	0.34129	0.046805
611.35	2.605	0.018947		1686.26	2.0834	0.00088168		1181.34	9.5078	1.7673e-06
725.71	3.4274	0.019598		1191.74	5.7626	0.00090921		616.45	6.8729	1.8689e-06
659.22	3.9772	0.0197		1496.24	3.8658	0.00098903		558.69	3.6883	2.2105e-06
513.23	2.7278	0.024164		1490.44	9.3019	0.0010933		957.65	10.606	2.2876e-06
982.28	4.4638	0.026084		877.24	2.391	0.0011981		960.03	10.963	2.8068e-06
990.09	3.303	0.027098		500.95	2.7535	0.0013698		935.27	8.5363	2.9786e-06
1303.2	4.0546	0.027695		1122.52	10.272	0.0013702		520.69	5.7755	3.1197e-06
1028.1	5.4911	0.027784		1519.27	2.2348	0.0013906		737.37	9.1173	3.2374e-06
984.62	3.9558	0.027844		1074.86	9.9352	0.0014176		856.15	5.2042	3.2933e-06
1102.3	6.9969	0.030786		986.35	4.3957	0.0014733		697.12	11.335	3.516e-06
1090.46	3.2375	0.03086		1298.82	3.1006	0.0014814		878.25	5.145	3.7629e-06
986.35	3.369	0.030945		1713.5	4.6722	0.0015767		1539.59	4.0982	4.2338e-06
1084.61	3.084	0.031006		498.06	2.8448	0.0015854		500.95	4.0928	4.8154e-06
1067.57	4.2801	0.031063		1444.89	2.6217	0.0016056		516.02	5.7822	5.0785e-06
685.04	3.8959	0.031243		1782.83	4.3643	0.0016176		534.64	3.9966	6.0039e-06
1237.4	5.9378	0.031807		1781.46	3.576	0.0017816		484	5.0593	6.4566e-06
1459.67	7.2062	0.032621		685.04	5.84	0.0020008		850.99	6.8366	6.498e-06
1013.13	3.018	0.033602		1354.38	7.7906	0.002037		1496.24	10.819	6.5062e-06
907.46	2.2674	0.033805		1314.27	3.8311	0.0020653		955.83	6.6686	7.8006e-06
1077.13	3.2766	0.035314		1684.92	2.0414	0.0021503		563.45	5.2307	8.0001e-06
1584.86	4.6743	0.036147		1711.51	8.8518	0.0021836		984.62	5.6349	8.218e-06
616.45	3.9722	0.036214		647.89	7.1491	0.0022028		1538.53	4.0809	8.5407e-06
558.69	4.5392	0.037891		590.2	4.2109	0.0022343		1207.73	10.075	1.1986e-05
1001.48	3.1011	0.037911		1806.06	5.8238	0.0022774		765.59	6.2681	1.2582e-05
632.01	5.4265	0.039536		1558.91	4.6039	0.0023194		611.35	6.1442	2.0211e-05
1074.86	2.8429	0.042153		1777.15	3.413	0.0024085		1144.49	4.4331	2.3396e-05
839.72	4.7382	0.042647		1315.68	3.4274	0.002443		1519.27	6.918	2.4962e-05
1059.59	2.8251	0.043312		1293.36	9.9286	0.0024512		1474.8	5.6628	4.8643e-05
935.27	4.7704	0.044194		1352.94	5.625	0.0024553		813.02	10.324	6.8221e-05
1444.89	7.877	0.047868		574.6	2.8259	0.0024564		1472.45	8.4561	7.4098e-05
1265.74	5.539	0.049545		1163.88	7.1009	0.0025024		536.73	6.558	7.5633e-05
				960.03	2.1958	0.0025694		834.47	5.7701	7.6145e-05
				1133.91	3.5887	0.0026424		1314.27	7.5528	7.7258e-05
				1342.25	3.3721	0.0026854		660.32	5.0431	9.3116e-05
				1783.86	4.5329	0.0028112		513.23	4.1514	0.00010566
				1757.28	2.3621	0.0030532		1521.27	6.752	0.00010956
				1357.77	4.1443	0.003324		1751.71	4.7651	0.00011069
				513.23	2.3758	0.0033418		1493.59	7.0794	0.00011304
				1090.46	2.6458	0.0034044		1752.81	5.0977	0.00011515
				1148.97	6.7439	0.0037675		918.81	2.9947	0.00011916
				1356.02	5.6065	0.0037815		1518.28	5.0419	0.00012443
				1102.3	5.3448	0.0040038		1329.29	6.505	0.00012685
				1779.19	4.2311	0.0040669		1757.28	4.7096	0.00012742
				1738.23	9.5238	0.0041046		1755.09	5.048	0.00016613
				1195.44	4.3783	0.0042066		1342.25	4.2017	0.0001755
				1474.8	2.999	0.0043191		903.73	4.967	0.00017694
				1013.13	7.3564	0.0043257		1753.81	4.9543	0.00018985
				1534.01	5.4616	0.0046638		982.28	5.1798	0.00022102
				1785.25	2.7192	0.0047553		1077.13	6.0489	0.00022355
				1498.4	3.2742	0.0049295		1340.57	4.7128	0.00023029
				988.86	3.5984	0.0053707		702.73	4.5675	0.00023122
				1755.09	2.4278	0.0055198		1537.7	5.6183	0.00023368
				520.69	3.0406	0.0055896		1687.77	4.0021	0.00023575
				973.14	4.4084	0.0056758		1151.11	3.6567	0.00023587
				984.62	2.7073	0.0057011		1578.76	3.7939	0.00024029
				680.87	4.7008	0.0059281		839.72	2.7384	0.00024253
				874.89	2.0152	0.0064054		1684.92	3.9656	0.00024606
				1775.04	2.9889	0.0068457		881.78	3.8952	0.00027086
				1488.03	9.3664	0.006992		667	5.8285	0.00027476
				1004.62	3.2407	0.007115		1813.56	2.5372	0.00038149
				1476.35	2.2182	0.0075057		990.09	10.293	0.00040032
				1535.68	3.4465	0.0075763		1008.74	3.566	0.00040434
				962.06	5.7175	0.007698		685.04	11.422	0.0004106
				1753.81	2.399	0.0078755		1138.27	3.0017	0.00043452
				1040.93	3.8568	0.0089755		962.06	19.897	0.00044395
				675.79	6.0584	0.00923		680.87	4.9444	0.00045368
				1804.39	5.7233	0.0094077		1328.09	3.5249	0.00046352
				1151.11	3.7521	0.0097389		1556.47	3.2188	0.00046433
				1028.1	6.0382	0.0099311		1065.37	6.6507	0.00050472
				1207.73	3.5802	0.010073		1019.42	5.7224	0.00050904
				702.73	4.2907	0.010511		1133.91	4.3579	0.00055885
				1752.81	2.0785	0.011352		1783.86	6.0818	0.00061173
				1338.82	3.2347	0.011797		1810.25	5.6117	0.0006295
				1328.09	2.2974	0.011996		1444.89	6.1328	0.00065802
				1209.53	5.4089	0.013367		928.57	6.4619	0.00070454
				955.83	2.3781	0.01397		953.97	2.8586	0.00070643
				1447.21	3.424	0.014238		1146.76	11.081	0.00076626
				1564.37	5.345	0.01462		1500.32	4.6301	0.00085257
				1337.57	3.0968	0.014953		1517.67	4.0725	0.00086113
				1810.25	3.1116	0.014976		1259.53	5.4104	0.00088487
				957.65	2.9821	0.015025		1354.38	12.232	0.00095153
				516.02	2.137	0.015808		1782.83	7.1572	0.00099938
				1098.35	4.6877	0.017869		988.86	8.4075	0.0010036
				725.71	3.8625	0.018144		638.98	6.8793	0.0010895
				1237.4	2.6143	0.018393		1786.49	3.9862	0.0010922
				1019.42	4.9139	0.018777		542.99	3.9947	0.0011206
				1340.57	3.06	0.019495		1301.17	4.4216	0.0012238
				1059.59	3.7651	0.020408		659.22	4.658	0.0012807
				1329.29	2.8222	0.020523		1177.49	4.4191	0.0012865
				1144.49	4.5735	0.023858		1777.15	7.3692	0.0014595
				907.46	3.4085	0.025239		663.68	6.1303	0.0014719
				1234.9	2.8544	0.028599		1013.13	10.297	0.0014779
				1217.91	5.3969	0.029069		1016.13	6.5003	0.0015231
				660.32	2.3941	0.030253		1781.46	6.9352	0.0015287
				611.35	2.1149	0.03058		1779.19	7.6381	0.001548
				1108.71	3.0586	0.031441		661.86	4.3126	0.0015496
				1177.49	2.4381	0.032108		1163.88	11.122	0.0016276
				1772.56	2.5119	0.032249		1469.68	11.043	0.0016283
				1366.38	2.2847	0.032777		1490.44	11.173	0.001676
				813.02	3.7335	0.033402		1558.91	5.9712	0.0017157
				935.27	2.2348	0.034258		1161.91	8.9179	0.0019078
				1566.43	3.8114	0.035692		1513.4	3.186	0.0019097
				990.09	4.241	0.03664		1366.38	4.6434	0.0019646
								1775.04	6.7461	0.0021854
								1205.88	5.015	0.002263
								1785.25	5.6025	0.0023142
								979.82	3.7212	0.0023151
								1356.02	8.4898	0.0023155
								1535.68	8.117	0.0024031
								973.14	9.5014	0.0025208
								1772.56	10.152	0.0026199
								1352.94	10.233	0.0026214
								993.86	6.7651	0.0027077
								1566.43	5.2024	0.002714
								1711.51	7.065	0.0027439
								1108.71	3.0758	0.0027784
								1209.53	9.6374	0.0028595
								1191.74	8.1144	0.0028771
								1806.06	11.833	0.002906
								1713.5	5.9421	0.003032
								1686.26	4.3503	0.0033233
								1303.2	3.6173	0.0034082
								1098.35	7.3723	0.0037595
								1315.68	6.1434	0.0038372
								1447.21	6.3298	0.0039095
								906.3	3.2889	0.0045765
								946.97	3.4739	0.0051569
								1501.54	4.2647	0.0052627
								725.71	3.6138	0.0053797
								1033.97	2.9199	0.0053837
								1804.39	11.001	0.005681
								1148.97	11.246	0.0057675
								1534.01	9.9986	0.0058045
								986.35	4.3629	0.0067063
								1067.57	4.2777	0.0071383
								1738.23	4.0615	0.0072198
								1125.95	2.9653	0.0086311
								1102.3	6.4855	0.0090076
								1701.12	2.807	0.0090921
								590.2	4.6893	0.0092565
								1309.7	3.6528	0.0097703
								1701.61	2.7027	0.0099403
								1564.37	6.4056	0.010303
								1516.25	3.8023	0.010489
								1561.38	12.069	0.010671
								1074.86	8.6212	0.010705
								1357.77	8.3865	0.010714
								1001.48	3.3686	0.011052
								1217.91	5.1338	0.01117
								1312.17	7.5526	0.011286
								905.34	3.8124	0.011316
								1741.95	4.612	0.011946
								1165.81	5.1485	0.012188
								1540.73	3.912	0.013003
								1141.07	3.2518	0.014248
								1271.46	8.2624	0.014977
								1237.4	4.1697	0.015091
								1769.95	4.4949	0.015361
								1043.52	4.2154	0.016276
								907.46	3.5495	0.016364
								1059.59	9.0751	0.016487
								1581.75	2.099	0.01689
								1293.36	13.685	0.017097
								1122.52	4.8746	0.018184
								1476.35	4.8167	0.018975
								1028.1	3.5615	0.01939
								1544.55	5.4876	0.020746
								369.06	2.9987	0.021838
								1488.03	8.0833	0.023979
								1234.9	6.4081	0.025735
								1541.52	4.533	0.026319
								1523.96	4.5307	0.026824
								1702.72	2.4185	0.029413
								1502.63	4.89	0.029706
								1023.06	2.6679	0.032844
								1040.93	4.4632	0.0331
								1198.86	4.3648	0.034269
								1249.07	2.6589	0.034866
								1543.06	4.3365	0.03748
								1326.39	3.0022	0.037836
								1195.44	2.9355	0.040049
								1090.46	3.9859	0.040395

## Sheet: OEtafrq-TaWT
OE::tafrq/TaWT
DIFFUSIBLES												VOLATILES
DD				LL				LP				DD				LL				LP
m/z	FC	Pval		m/z	FC	Pval		m/z	FC	Pval		m/z	FC	Pval		m/z	FC	Pval		m/z	FC	Pval
574.6	3.6129	0.0018494		1028.1	3.8949	8.0871e-05		611.35	5.4758	9.3489e-07		N/a				N/a				391	1.7205	0.0042228
1237.4	3.2286	0.0022253		1711.51	4.9513	0.00088491		563.45	3.4384	1.0628e-05										97.77	2.0604	0.008213
1019.42	3.4986	0.0043711		484	2.4885	0.00093871		296.76	4.1082	3.5744e-05										198.93	1.9196	0.011015
1043.52	2.7169	0.0053673		906.3	2.4148	0.0024417		500.95	5.2641	4.0512e-05										79.89	1.785	0.012301
1130.91	3.4033	0.0065648		616.45	2.8373	0.0027268		484	3.8928	4.9664e-05										463.88	1.8657	0.013425
616.45	3.5923	0.010233		879.66	2.1665	0.0029826		574.6	6.7083	5.4516e-05										231.93	1.7128	0.020439
663.68	3.1189	0.011382		480.08	2.1014	0.005509		655.82	5.8695	5.4775e-05										77.91	1.6113	0.020874
655.82	3.6654	0.012719		1207.73	2.6574	0.0058038		632.01	7.5626	5.5884e-05										148.97	1.8685	0.032464
660.32	4.125	0.012734		988.86	3.0047	0.0058666		834.47	5.7221	5.6921e-05										244.01	1.8453	0.036059
1217.91	6.1194	0.012827		1023.06	4.8772	0.0068563		516.02	5.6696	9.4308e-05										279.02	1.5889	0.049371
647.89	5.0733	0.015136		1008.74	3.925	0.0072355		654.01	4.8993	0.00010153
516.02	3.507	0.015911		905.34	2.3979	0.0072616		1354.38	5.651	0.00011626
1303.2	4.9829	0.016129		1133.91	2.499	0.0077725		837	4.9426	0.00013383
1071.04	2.8371	0.021053		1312.17	2.639	0.0078107		498.06	3.0396	0.00013597
659.22	4.0868	0.021336		1098.35	2.6271	0.0078939		480.08	3.1925	0.00014685
632.01	4.4671	0.021768		1016.13	6.2079	0.013707		616.45	8.1093	0.00023112
534.64	4.1078	0.02252		759.18	2.3765	0.014169		558.69	4.5792	0.00023775
1265.74	5.2855	0.025032		1102.3	5.2504	0.014809		536.73	7.7084	0.00031831
1016.13	3.4721	0.026392		990.09	8.9279	0.018673		716.95	5.9577	0.00037818
1502.63	8.8977	0.02674		663.68	2.6226	0.020339		781.17	5.2394	0.00038758
1430.49	5.1591	0.030118		1205.88	3.8068	0.023416		797.13	4.0102	0.00043216
654.01	3.3704	0.033687		737.37	3.3923	0.023936		782.82	6.4833	0.00046566
661.86	3.9274	0.03372		984.62	2.1096	0.024113		755.14	3.9904	0.00049126
1323.7	5.1294	0.038814		647.89	3.4936	0.02686		513.23	4.3697	0.00050325
1481.13	11.539	0.039277		907.46	2.9405	0.028341		702.73	5.3633	0.00052339
520.69	4.0591	0.039329		982.28	2.6437	0.028814		982.28	5.1505	0.00055389
1523.96	4.2101	0.042764		1354.38	2.8996	0.028847		381.77	3.0476	0.00072943
1476.35	3.7623	0.042885		1459.67	2.0253	0.02926		821.02	3.464	0.000779
1153.43	4.2669	0.042946		1163.88	2.6926	0.030641		659.22	3.5532	0.00080071
960.03	3.9495	0.043787		1309.7	2.6601	0.031161		759.18	5.869	0.0008053
1539.59	4.7117	0.043808		1090.46	2.5714	0.032541		1217.91	7.8941	0.00096277
1538.53	3.8478	0.044778		1161.91	3.0445	0.038043		955.83	3.804	0.00099787
542.99	2.1848	0.045369		725.71	3.426	0.038427		520.69	7.3387	0.0010968
1519.27	5.4975	0.04575		1352.94	2.853	0.038586		973.14	12.619	0.0011297
				997.38	6.422	0.042115		1502.63	10.499	0.0012238
				1040.93	2.2059	0.042995		918.81	3.4464	0.0012768
				1141.07	2.7553	0.043505		590.2	5.6935	0.0013106
				1115.39	2.2011	0.046341		953.97	3.1625	0.001363
								1013.13	7.78	0.0014073
								775.16	4.607	0.0014592
								737.37	8.5349	0.0014895
								542.99	4.1366	0.0015453
								663.68	6.1441	0.0016004
								1459.67	6.86	0.0016885
								1566.43	2.6523	0.0017515
								667	5.7598	0.0020014
								1259.53	5.5429	0.0020093
								979.82	5.8885	0.0023003
								804.94	3.5411	0.0023571
								534.64	5.4094	0.0024708
								1133.91	11.358	0.0027427
								1481.13	8.6253	0.002811
								839.72	2.4929	0.0030356
								1084.61	3.4176	0.0031052
								1209.53	7.9178	0.0033506
								920.39	2.8987	0.0034327
								1071.04	3.0155	0.0034639
								697.12	6.284	0.0037282
								878.25	2.7718	0.0038453
								853.12	3.7311	0.0044558
								647.89	9.1434	0.0046317
								1165.81	4.8446	0.0050523
								962.06	4.2971	0.0054174
								1163.88	6.0826	0.0057475
								1023.06	3.3333	0.0057682
								1501.54	6.3159	0.0059392
								1328.09	2.7984	0.0060307
								1028.1	7.2574	0.0061525
								903.73	4.2326	0.0062859
								369.06	3.4461	0.0066992
								1271.46	12.221	0.0069769
								765.59	6.3701	0.007252
								813.02	7.3609	0.0073516
								988.86	3.1971	0.0084248
								1102.3	7.1411	0.0088088
								1074.86	5.0324	0.009061
								877.24	3.0396	0.0091611
								1496.24	4.0858	0.0094897
								957.65	5.9746	0.009638
								1521.27	7.7101	0.0097159
								1198.86	5.634	0.0097501
								1352.94	6.278	0.0097797
								1357.77	2.8447	0.010118
								1191.74	7.0547	0.010259
								680.87	4.1112	0.010402
								1144.49	5.2848	0.010411
								661.86	4.1463	0.010417
								952.07	3.6409	0.010485
								1195.44	2.7111	0.010799
								638.98	6.3109	0.011161
								1329.29	5.088	0.011234
								1523.96	10.474	0.011754
								1069.57	4.0441	0.011889
								1019.42	4.0266	0.01238
								984.62	3.4342	0.013301
								1125.95	4.6698	0.014118
								1065.37	8.2843	0.014477
								1690.76	2.7896	0.015221
								895.13	2.4678	0.015246
								850.99	2.8834	0.015317
								874.89	2.6504	0.015637
								1498.4	4.8334	0.017388
								1161.91	4.0239	0.017485
								1293.36	9.7535	0.018954
								1098.35	3.0921	0.019091
								1312.17	6.5716	0.019387
								1177.49	4.4791	0.019525
								1008.74	3.5271	0.019585
								685.04	9.086	0.020026
								1249.07	3.9465	0.02065
								1366.38	2.8608	0.022439
								675.79	3.4876	0.02245
								879.66	2.7335	0.022742
								1456.74	5.8101	0.02425
								854.31	2.3136	0.024303
								1207.73	6.1822	0.024606
								1287.28	5.6539	0.024722
								1043.52	4.9579	0.026321
								978.47	6.0633	0.027333
								1314.27	4.7403	0.027982
								1711.51	2.7528	0.030274
								1561.38	3.8217	0.030612
								660.32	3.9737	0.030723
								1326.39	3.1321	0.032826
								1500.32	5.6889	0.034669
								1544.55	5.6029	0.042406
								1519.27	4.1292	0.044796
								1146.76	10.239	0.04958
